# Supplementary material for: Metal-free direct C–H phosphonation of N-heterocycles with diphenylphosphine oxides under mild conditions
Source: Royal Society of Chemistry journal article supplement (doi:10.1039/d3gc01251d), 2023-01-01
Supplement: d3gc01251d1.pdf [file d3gc01251d1.pdf]

# Metal-Free Direct C-H Phosphonation of N-heterocycles with Diphenylphosphine Oxides under Mild Condition

Zhao-Nan Cai,<sup>a</sup> Ya-Ping Han,<sup>a</sup> Yuecheng Zhang,<sup>a</sup> Hong-Yu Zhang,<sup>\*a</sup> Jiquan Zhao,<sup>\*a</sup>  
and Shang-Dong Yang<sup>b</sup>

<sup>a</sup> School of Chemical Engineering and Technology, Hebei Provincial Key Lab of Green Chemical Technology & High Efficient Energy Saving, Tianjin Key Laboratory of Chemical Process Safety, Hebei University of Technology, Tianjin 300130, P. R. China. Phone: 86-22-60204726.

<sup>b</sup> State Key Laboratory of Applied Organic Chemistry, Lanzhou University, Lanzhou 730000, P. R. China

\* E-mail: zhanghy@hebut.edu.cn; zhaojq@hebut.edu.cn

## Supporting Information

### Table of Contents

|                                                                                                     |     |
|-----------------------------------------------------------------------------------------------------|-----|
| I. General methods and materials.....                                                               | S2  |
| II. Synthesis of substrates.....                                                                    | S2  |
| III. General procedure.....                                                                         | S2  |
| IV. Procedure for the recovery and reuse of remainder DBU, diphenylphosphine oxide and DMC<br>..... | S3  |
| V. Mechanistic Experiments.....                                                                     | S4  |
| VI. Characterization data of <b>3a–5</b> .....                                                      | S5  |
| VII. NMR charts of <b>3a–5</b> .....                                                                | S18 |
| VIII. References.....                                                                               | S75 |

## I. General methods and materials

All manipulations were performed under an air atmosphere unless otherwise stated.  $^1\text{H}$  and  $^{13}\text{C}$  NMR spectra were recorded on a Bruker AC-P 400 spectrometer (400 MHz for  $^1\text{H}$ , 100 MHz for  $^{13}\text{C}$ ) in  $\text{CDCl}_3$ . Chemical shifts (ppm) were recorded with tetramethylsilane (TMS) as the internal reference standard. Multiplicities are given as: s (singlet), d (doublet), t (triplet), dd (doublet of doublets), q (quartet) or m (multiplet). Copies of their  $^1\text{H}$  NMR and  $^{13}\text{C}$  NMR spectra are provided in the Supporting Information. High resolution mass spectra (HRMS) were recorded on quadrupole time-of-flight mass spectrometer (Q-TOF-MS) using electrospray ionization (ESI) as an ionization method. Melting points were obtained on Shanghai Inesa WRS-3 melting point apparatus. Solvents were dried and purified according to the procedure from "Purification of Laboratory Chemicals book". The crude products were purified by flash column chromatography on silica gel and the reported yields are the actual isolated yields of pure products. Unless stated otherwise, commercial reagents were used without further purification. All reagents were weighed and handled in air at room temperature.

## II. Synthesis of substrates

### General Procedure for the Preparation of various 1,2,4-Triazine-3,5(2H,4H)-diones

The substrates of various 1,2,4-triazine-3,5(2H,4H)-diones **1a-1t**, **1ai** were synthesized according to procedures described in the previous literature studies.<sup>1,2</sup>

### General Procedure to Prepare Various Quinoxalin-2(1H)-ones

The substrates of various quinoxalin-2(1H)-ones **1z-1ab**, **1aj-1am** were synthesized according to procedures described in the previous literature studies.<sup>3</sup>

## III. General procedure

### Procedure for the Synthesis of **3a**

To a solution of 2,4-dibenzyl-1,2,4-triazine-3,5(2H,4H)-dione **1a** (0.2 mmol) and diphenylphosphine oxide **2a** (0.5 mmol) in DMC (1 mL) were placed in a flame-dried Schlenk-tube equipped with a magnetic stir bar, followed by addition of DBU (2.0 equiv.) *via* syringe. The reaction was stirred at room temperature while the flask was left uncapped for 12 h. The progress of the reaction was monitored by TLC. After completion, the residue was quenched with water, and ethyl acetate was added three times for extraction. The combined organic layers were dried over anhydrous  $\text{Na}_2\text{SO}_4$ . The resulting mixture was then concentrated under reduced pressure and washed by *n*-hexane to give **3a** (97% yield).

### Scale-up experiment

To a solution of 2,4-dibenzyl-1,2,4-triazine-3,5(2H,4H)-dione **1a** (1.17 g, 4 mmol) and

diphenylphosphine oxide **2a** (2.02 g, 10 mmol) in DMC (0.2 M) were placed in a flame-dried Schlenk-tube equipped with a magnetic stir bar, followed by addition of DBU (2.0 equiv.) *via* syringe. The reaction was stirred at room temperature while the flask was left uncapped for 12 h. The progress of the reaction was monitored by TLC. After completion, the residue was quenched with water, and ethyl acetate was added three times for extraction. The combined organic layers were dried over anhydrous Na<sub>2</sub>SO<sub>4</sub>. The resulting mixture was then concentrated under reduced pressure and washed by *n*-hexane to give **3a** (1.80 g, 92% yield).

#### **Procedure for the synthesis of 4<sup>3</sup>**

A solution of **3u** (0.2 mmol) in toluene was added CuTc (0.008 mmol), then the mixture was stirred for 3 min at room temperature, followed by addition of TsN<sub>3</sub> (0.24 mmol) *via* syringe. The reaction mixture was stirred for 7 h at room temperature. The residue was purified by column chromatography to afford **4** as white solid in 84% yield.

#### **Procedure for the synthesis of 5<sup>3</sup>**

A mixture of **3t** (0.2 mmol) and an excess of *m*-CPBA (0.4 mmol) was stirred at room temperature for 13 h. The mixture was poured into saturated NaHCO<sub>3</sub> (aq.) and extracted with ethyl acetate. The combined extracts were dried over anhydrous Na<sub>2</sub>SO<sub>4</sub>, filtered, and evaporated. The residue was purified by column chromatography to afford **5** as white solid in 41% yield.

### **IV. Procedure for the recovery and reuse of remainder DBU, diphenylphosphine oxide and DMC**

To a solution of 2,4-dibenzyl-1,2,4-triazine-3,5(2*H*,4*H*)-dione **1a** (0.2 mmol) and diphenylphosphine oxide **2a** (2.5 equiv.) in DMC (1 mL) were placed in a flame-dried Schlenk-tube equipped with a magnetic stir bar, followed by addition of DBU (2.0 equiv.) *via* syringe. The reaction was stirred at room temperature while the Schlenk-tube was left uncapped for 12 h. The progress of the reaction was monitored by TLC. After the reaction completing, the reaction mixture was distillation under reduced pressure (0.1 Mpa, 43°C) and 88 % of DMC was recovered. And the residue was washed with water and *n*-hexane, the expected product was obtained in 89% yield, which was collected by filtration. The water (include excess DBU and diphenylphosphine oxide) was evaporated under reduced pressure. The 0.2 mmol of 2,4-dibenzyl-1,2,4-triazine-3,5(2*H*,4*H*)-dione, diphenylphosphine oxide (2.0 equiv.), DMC (1 mL) and DBU (1.0 equiv.) were added to the residue, and the mixture reacted under standard conditions for 12 hours. The abovementioned post-processing procedure was repeated, and the target product was obtained in 87% yield. This cycle was repeated four times totally, the yield of each cycle is shown in Figure S1.

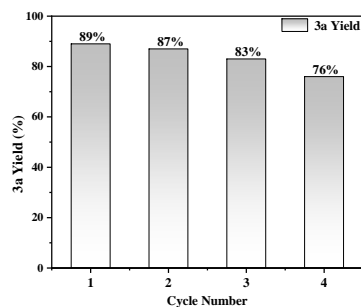

**Figure S1** Product yields of recovery and reuse experiments

## V. Mechanistic Experiments

### Radical Trapping Experiment

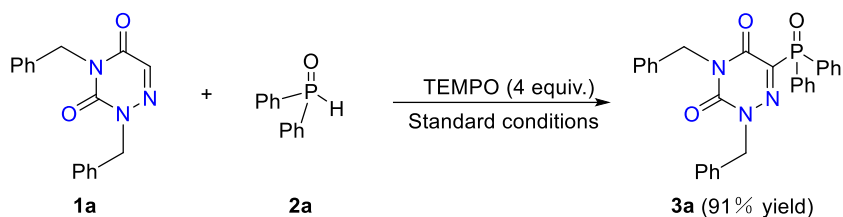

To a solution of 2,4-dibenzyl-1,2,4-triazine-3,5(2*H*,4*H*)-dione **1a** (0.2 mmol), diphenylphosphine oxide **2a** (0.5 mmol) and 2,2,6,6-tetramethyl-1-piperidinyloxy (TEMPO) (4.0 equiv.) in DMC (1 mL) were placed in a flame-dried Schlenk-tube equipped with a magnetic stir bar, followed by addition of DBU (2.0 equiv.) *via* syringe. The reaction was stirred at room temperature while the flask was left uncapped for 12 h. The progress of the reaction was monitored by TLC. After completion, the residue was quenched with water, and ethyl acetate was added three times for extraction. The combined organic layers were dried over anhydrous Na<sub>2</sub>SO<sub>4</sub>. The resulting mixture was then concentrated under reduced pressure and washed by *n*-hexane to give **3a** (91% yield).

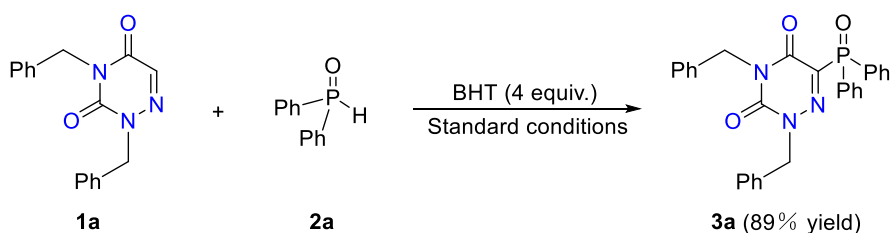

To a solution of 2,4-dibenzyl-1,2,4-triazine-3,5(2*H*,4*H*)-dione **1a** (0.2 mmol), diphenylphosphine oxide **2a** (0.5 mmol) and butylated hydroxytoluene (BHT) (4 equiv.) in DMC (1 mL) were placed in a flame-dried Schlenk-tube equipped with a magnetic stir bar, followed by addition of DBU (2.0 equiv.) *via* syringe. The reaction was stirred at room temperature while the flask was left uncapped for 12 h. The progress of the reaction was monitored by TLC. After completion, the residue was quenched with water, and ethyl acetate was added three times for extraction. The combined organic layers were dried over anhydrous Na<sub>2</sub>SO<sub>4</sub>. The resulting mixture was then concentrated under reduced pressure and

washed by *n*-hexane, the residues were further purified by chromatography on silica gel to afford **3a** (89% yield).

### The detection of intermediate **B**

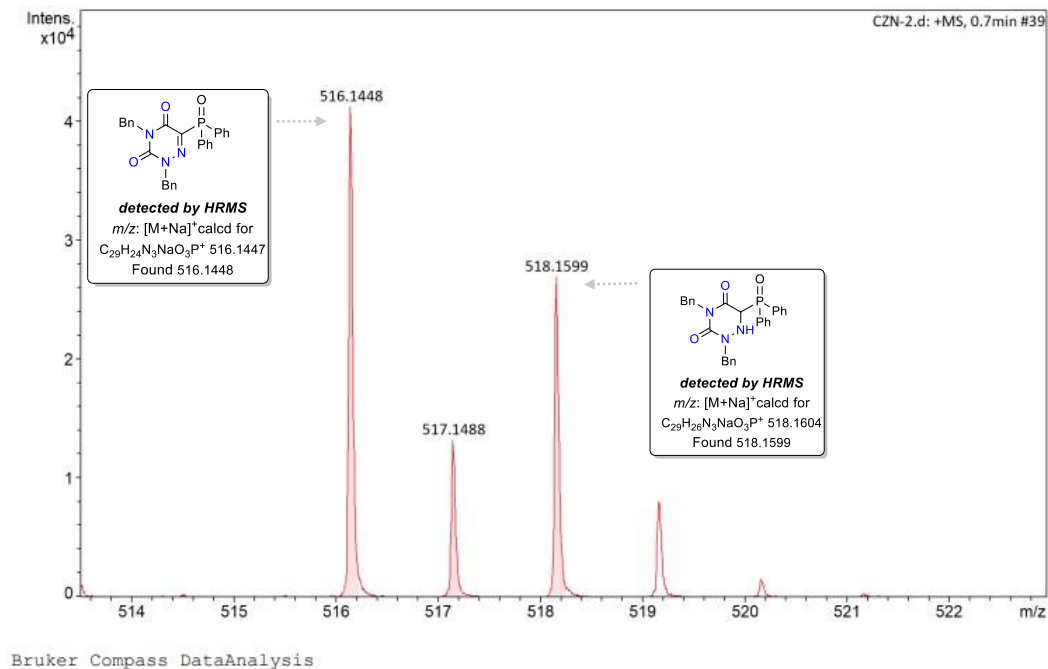

**Figure S2** The HRMS analysis of the intermediate **B**

To a solution of 2,4-dibenzyl-1,2,4-triazine-3,5(2*H*,4*H*)-dione **1a** (0.2 mmol) and diphenylphosphine oxide **2a** (0.5 mmol) in DMC (1 mL) were placed in a flame-dried Schlenk-tube equipped with a magnetic stir bar, followed by addition of DBU (2.0 equiv.) *via* syringe. The reaction was stirred at room temperature while the flask was left uncapped. After 1h reaction, the reaction mixture was directly detected by high-resolution mass spectrometer, and the intermediate **B** and target product **3a** can be found respectively.

## VI. Characterization data of **3a–5**

Compounds **3z**, **3aa**, **3ad**, **3ae**, **3af**, **3ag** are known compounds<sup>4,7</sup>, so only <sup>1</sup>H NMR spectrum were included in the Supporting Information.

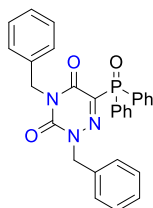

2,4-dibenzyl-6-(diphenylphosphoryl)-1,2,4-triazine-3,5(2*H*,4*H*)-dione (**3a**). a white solid (97% yield, 96.1 mg). m. p. = 178-179 °C. <sup>1</sup>H NMR (400 MHz, CDCl<sub>3</sub>)  $\delta$ : 7.82–7.78 (m, 4H), 7.63–7.60 (m,

2H), 7.54–7.50 (m, 4H), 7.44 (s, 2H), 7.34–7.30 (m, 6H), 7.22–7.20 (m, 2H), 5.05 (s, 2H), 5.03 (s, 2H);  $^{13}\text{C}$  NMR (100 MHz,  $\text{CDCl}_3$ )  $\delta$ : 154.8, 154.6, 148.1, 141.0, 139.8, 134.8, 134.5, 132.4(d,  $J = 2.2$  Hz), 131.8(d,  $J = 10.0$  Hz), 130.2, 129.6, 129.1, 128.7, 128.5, 128.4, 128.2, 55.8, 44.1;  $^{31}\text{P}$  NMR (162 MHz,  $\text{CDCl}_3$ )  $\delta$ : 22.8 (s); HRMS (ESI):  $m/z$  calcd for  $\text{C}_{29}\text{H}_{24}\text{N}_3\text{NaO}_3\text{P}^+$   $[\text{M}+\text{Na}]^+$  516.1447. Found 516.1447.

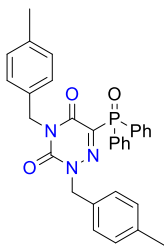

6-(diphenylphosphoryl)-2,4-bis(4-methylbenzyl)-1,2,4-triazine-3,5(2H,4H)-dione (**3b**). a white solid (80% yield, 83.6 mg). m. p. = 183–184 °C.  $^1\text{H}$  NMR (400 MHz,  $\text{CDCl}_3$ )  $\delta$ : 7.80–7.75 (m, 4H), 7.61–7.57 (m, 2H), 7.51–7.47 (m, 4H), 7.31 (d,  $J = 8.0$  Hz, 2H), 7.11–7.07 (m, 6H), 4.97 (s, 2H), 4.95 (s, 2H), 2.34 (s, 3H), 2.30 (s, 3H);  $^{13}\text{C}$  NMR (100 MHz,  $\text{CDCl}_3$ )  $\delta$ : 154.9, 154.7, 148.0, 140.9, 139.6, 138.4, 138.0, 132.4(d,  $J = 3.0$  Hz), 132.0, 131.8(d,  $J = 9.7$  Hz), 131.5, 130.3, 129.6, 129.4, 129.2(d,  $J = 7.0$  Hz), 128.4(d,  $J = 12.9$  Hz), 55.7, 43.9, 21.2, 21.1;  $^{31}\text{P}$  NMR (162 MHz,  $\text{CDCl}_3$ )  $\delta$ : 22.8 (s); HRMS (ESI):  $m/z$  calcd for  $\text{C}_{31}\text{H}_{28}\text{N}_3\text{NaO}_3\text{P}^+$   $[\text{M}+\text{Na}]^+$  544.1760. Found 544.1761.

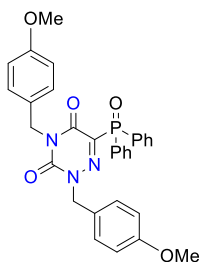

6-(diphenylphosphoryl)-2,4-bis(4-methoxybenzyl)-1,2,4-triazine-3,5(2H,4H)-dione (**3c**). a white solid (82% yield, 90.3 mg). m. p. = 172–173 °C.  $^1\text{H}$  NMR (400 MHz,  $\text{CDCl}_3$ )  $\delta$ : 7.79–7.74 (m, 4H), 7.60–7.57 (m, 2H), 7.50–7.47 (m, 4H), 7.37 (d,  $J = 8.0$  Hz, 2H), 7.11 (d,  $J = 8.0$  Hz, 2H), 6.81–6.77 (m, 4H), 4.95 (s, 2H), 4.93 (s, 2H), 3.79 (s, 3H), 3.76 (s, 3H);  $^{13}\text{C}$  NMR (100 MHz,  $\text{CDCl}_3$ )  $\delta$ : 159.7, 159.4, 154.8, 154.6, 148.0, 140.8, 139.5, 132.3(d,  $J = 2.5$  Hz), 131.8(d,  $J = 9.9$  Hz), 131.2, 130.6, 130.3, 129.2, 128.4(d,  $J = 12.9$  Hz), 127.1, 126.6, 113.9(d,  $J = 17.5$  Hz), 55.3, 55.2, 55.2, 43.6;  $^{31}\text{P}$  NMR (162 MHz,  $\text{CDCl}_3$ )  $\delta$ : 22.9 (s); HRMS (ESI):  $m/z$  calcd for  $\text{C}_{31}\text{H}_{28}\text{N}_3\text{NaO}_5\text{P}^+$   $[\text{M}+\text{Na}]^+$  576.1659. Found 576.1658.

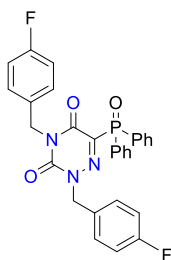

6-(diphenylphosphoryl)-2,4-bis(4-fluorobenzyl)-1,2,4-triazine-3,5(2H,4H)-dione (**3d**). a white solid (63% yield, 66.2 mg). m. p. = 158–159 °C.  $^1\text{H}$  NMR (400 MHz,  $\text{CDCl}_3$ )  $\delta$ : 7.78–7.73 (m, 4H), 7.62–7.58 (m, 2H), 7.51–7.48 (m, 4H), 7.42–7.39 (m, 2H), 7.15–7.12 (m, 2H), 7.79 (q,  $J = 8.0$  Hz, 4H), 4.98 (s, 2H), 4.95 (s, 2H);  $^{13}\text{C}$  NMR (100 MHz,  $\text{CDCl}_3$ )  $\delta$ : 164.0, 163.8, 161.6, 161.4, 154.7, 154.5, 148.0, 141.3, 140.0, 132.5(d,  $J = 3.3$  Hz), 131.8, 131.7, 131.7, 131.1(d,  $J = 7.6$  Hz), 130.7(d,  $J = 2.5$  Hz), 130.2(d,  $J = 3.5$  Hz), 130.1, 129.0, 128.5(d,  $J = 13.2$  Hz), 115.8, 115.6(d,  $J = 1.0$  Hz), 115.3, 55.0,

43.5;  $^{31}\text{P}$  NMR (162 MHz,  $\text{CDCl}_3$ )  $\delta$ : 22.9 (s); HRMS (ESI):  $m/z$  calcd for  $\text{C}_{29}\text{H}_{22}\text{F}_2\text{N}_3\text{NaO}_3\text{P}^+$   $[\text{M}+\text{Na}]^+$  552.1259. Found 552.1257.

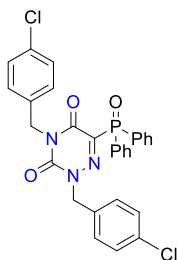

*2,4-bis(4-chlorobenzyl)-6-(diphenylphosphoryl)-1,2,4-triazine-3,5(2H,4H)-dione (3e)*. a white solid (72% yield, 80.3 mg). m. p. = 160-161 °C.  $^1\text{H}$  NMR (400 MHz,  $\text{CDCl}_3$ )  $\delta$ : 7.72–7.67 (m, 4H), 7.57–7.53 (m, 2H), 7.46–7.42 (m, 4H), 7.29 (d,  $J$  = 8.0 Hz, 2H), 7.21–7.17 (m, 4H), 7.03 (d,  $J$  = 8.0 Hz, 2H), 4.92 (s, 2H), 4.89 (s, 2H);  $^{13}\text{C}$  NMR (100 MHz,  $\text{CDCl}_3$ )  $\delta$ : 154.6, 154.4, 148.0, 141.4, 140.1, 134.7, 134.3, 133.2, 132.7, 132.5(d,  $J$  = 3.3 Hz), 131.8(d,  $J$  = 10.0 Hz), 131.1, 130.6, 130.0, 128.9, 128.7, 128.6, 128.5, 55.0, 43.5;  $^{31}\text{P}$  NMR (162 MHz,  $\text{CDCl}_3$ )  $\delta$ : 22.9 (s); HRMS (ESI):  $m/z$  calcd for  $\text{C}_{29}\text{H}_{22}\text{Cl}_2\text{N}_3\text{NaO}_3\text{P}^+$   $[\text{M}+\text{Na}]^+$  584.0668. Found 584.0667.

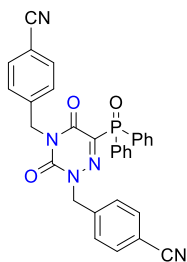

*4,4'-((6-(diphenylphosphoryl)-3,5-dioxo-1,2,4-triazine-2,4(3H,5H)-diyl)bis(methylene))dibenzonitrile (3f)*. a white solid (51% yield, 55.7 mg). m. p. = 201-202 °C.  $^1\text{H}$  NMR (400 MHz,  $\text{CDCl}_3$ )  $\delta$ : 7.79–7.74 (m, 4H), 7.64 (t,  $J$  = 8.0 Hz, 2H), 7.59–7.49 (m, 11H), 7.28 (s, 1H), 5.08 (s, 2H), 5.03 (s, 2H);  $^{13}\text{C}$  NMR (100 MHz,  $\text{CDCl}_3$ )  $\delta$ : 154.5, 154.3, 148.0, 142.0, 140.7, 140.0, 139.0, 132.7(d,  $J$  = 2.6 Hz), 132.5, 132.4, 131.7(d,  $J$  = 11.0 Hz), 130.3, 129.8, 128.6(d,  $J$  = 12.6 Hz), 118.3, 118.1, 112.7, 112.4, 55.2, 43.9;  $^{31}\text{P}$  NMR (162 MHz,  $\text{CDCl}_3$ )  $\delta$ : 23.0 (s); HRMS (ESI):  $m/z$  calcd for  $\text{C}_{31}\text{H}_{22}\text{N}_5\text{NaO}_3\text{P}^+$   $[\text{M}+\text{Na}]^+$  566.1352. Found 566.1353.

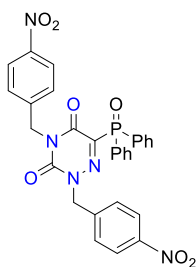

*6-(diphenylphosphoryl)-2,4-bis(4-nitrobenzyl)-1,2,4-triazine-3,5(2H,4H)-dione (3g)*. a yellow solid (58% yield, 67.7 mg). m. p. = 118-119 °C.  $^1\text{H}$  NMR (400 MHz,  $\text{CDCl}_3$ )  $\delta$ : 8.07 (d,  $J$  = 8.0 Hz, 4H), 7.79–7.74 (m, 4H), 7.63–7.60 (m, 2H), 7.56–7.48 (m, 6H), 7.32 (d,  $J$  = 8.0 Hz, 2H), 5.11 (s, 2H), 5.06 (s, 2H);  $^{13}\text{C}$  NMR (100 MHz,  $\text{CDCl}_3$ )  $\delta$ : 154.5, 154.3, 148.0, 148.0, 147.8, 142.2, 141.4, 141.0, 140.9, 132.8(d,  $J$  = 2.6 Hz), 131.8(d,  $J$  = 9.5 Hz), 130.5, 130.1, 129.8, 128.6(d,  $J$  = 13.1 Hz), 123.9(d,  $J$  = 16.4 Hz), 54.9, 43.6;  $^{31}\text{P}$  NMR (162 MHz,  $\text{CDCl}_3$ )  $\delta$ : 22.9 (s); HRMS (ESI):  $m/z$  calcd for  $\text{C}_{29}\text{H}_{22}\text{N}_5\text{NaO}_7\text{P}^+$   $[\text{M}+\text{Na}]^+$  606.1149. Found 606.1148.

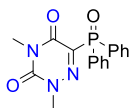

6-(diphenylphosphoryl)-2,4-dimethyl-1,2,4-triazine-3,5(2H,4H)-dione (**3h**). a white solid (74% yield, 50.4 mg). m. p. = 198-199 °C. <sup>1</sup>H NMR (400 MHz, CDCl<sub>3</sub>) δ: 7.87–7.82 (m, 4H), 7.58–7.55 (m, 2H), 7.49–7.46 (m, 4H), 3.69 (s, 3H), 3.27 (s, 3H); <sup>13</sup>C NMR (100 MHz, CDCl<sub>3</sub>) δ: 155.4 155.2, 148.5, 139.9, 138.6, 132.5(d, *J* = 2.9 Hz), 131.9(d, *J* = 10.0 Hz), 130.2, 129.1, 128.4(d, *J* = 12.8 Hz), 40.5, 27.1; <sup>31</sup>P NMR (162 MHz, CDCl<sub>3</sub>) δ: 21.5 (s); HRMS (ESI): *m/z* calcd for C<sub>17</sub>H<sub>16</sub>N<sub>3</sub>NaO<sub>3</sub>P<sup>+</sup> [M+Na]<sup>+</sup> 364.0821. Found 364.0821.

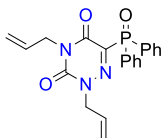

2,4-diallyl-6-(diphenylphosphoryl)-1,2,4-triazine-3,5(2H,4H)-dione (**3i**). a white solid (76% yield, 59.6 mg). m. p. = 152-153 °C. <sup>1</sup>H NMR (400 MHz, CDCl<sub>3</sub>) δ: 7.84–7.79 (m, 4H), 7.59–7.55 (m, 2H), 7.50–7.46 (m, 4H), 5.89–5.74 (m, 2H), 5.29–5.19 (m, 4H), 4.56 (d, *J* = 4.0 Hz, 2H), 4.45 (d, *J* = 4.0 Hz, 2H); <sup>13</sup>C NMR (100 MHz, CDCl<sub>3</sub>) δ: 154.6, 154.4, 147.7, 140.8, 139.5, 132.4(d, *J* = 3.2 Hz), 131.9(d, *J* = 9.7 Hz), 130.4, 130.2, 129.6, 129.1, 128.5(d, *J* = 12.3 Hz), 120.4, 120.0, 54.9, 42.9; <sup>31</sup>P NMR (162 MHz, CDCl<sub>3</sub>) δ: 22.1 (s); HRMS (ESI): *m/z* calcd for C<sub>21</sub>H<sub>20</sub>N<sub>3</sub>NaO<sub>3</sub>P<sup>+</sup> [M+Na]<sup>+</sup> 416.1134. Found 416.1130.

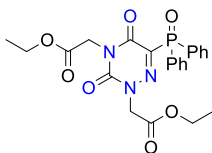

diethyl 2,2'-(6-(diphenylphosphoryl)-3,5-dioxo-1,2,4-triazine-2,4(3H,5H)-diyl)diacetate (**3j**). a white solid (74% yield, 72.2 mg). m. p. = 183-184 °C. <sup>1</sup>H NMR (400 MHz, CDCl<sub>3</sub>) δ: 7.86–7.81 (m, 4H), 7.60–7.56 (m, 2H), 7.51–7.47 (m, 4H), 4.78 (s, 2H), 4.58 (s, 2H), 4.26–4.15 (m, 4H), 1.28 (t, *J* = 8.0 Hz, 3H), 1.23 (t, *J* = 8.0 Hz, 3H); <sup>13</sup>C NMR (100 MHz, CDCl<sub>3</sub>) δ: 16 6.6, 165.9, 154.5, 154.3, 148.0, 141.5, 140.3, 132.7(d, *J* = 2.0 Hz), 132.0(d, *J* = 10.4 Hz), 13 0.0, 128.9, 128.6(d, *J* = 12.8 Hz), 62.2, 62.1, 53.4, 41.4, 14.1, 14.0; <sup>31</sup>P NMR (162 MHz, CD Cl<sub>3</sub>) δ: 21.6 (s); HRMS (ESI): *m/z* calcd for C<sub>23</sub>H<sub>24</sub>N<sub>3</sub>NaO<sub>7</sub>P<sup>+</sup> [M+Na]<sup>+</sup> 508.1244. Found 508.1 245.

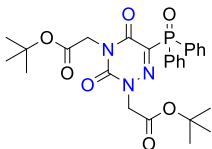

di-tert-butyl 2,2'-(6-(diphenylphosphoryl)-3,5-dioxo-1,2,4-triazine-2,4(3H,5H)-diyl)diacetate (**3k**). a white solid (80% yield, 86.7 mg). m. p. = 161-162 °C. <sup>1</sup>H NMR (400 MHz, CDCl<sub>3</sub>) δ: 7.86–7.81 (m, 4H), 7.58–7.55 (m, 2H), 7.49–7.45 (m, 4H), 4.67 (s, 2H), 4.47 (s, 2H), 1.45 (s, 9H), 1.40 (s, 9H); <sup>13</sup>C NMR (100 MHz, CDCl<sub>3</sub>) δ: 165.5, 164.9, 154.6, 154.4, 148.0, 141.0, 140.0, 132.5(d, *J* = 2.4 Hz), 132.0(d, *J* = 9.9 Hz), 130.2, 129.0, 128.5(d, *J* = 12.9 Hz), 83.3, 83.1, 54.1, 42.1, 27.9, 27.8; <sup>31</sup>P NMR (162 MHz, CDCl<sub>3</sub>) δ: 21.5 (s); HRMS (ESI): *m/z* calcd for C<sub>27</sub>H<sub>32</sub>N<sub>3</sub>NaO<sub>7</sub>P<sup>+</sup> [M+H]<sup>+</sup> 564.1870. Found 564.1870.



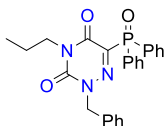

2-benzyl-6-(diphenylphosphoryl)-4-propyl-1,2,4-triazine-3,5(2H,4H)-dione (**3l**). a white solid (87% yield, 77.6 mg). m. p. = 145-146 °C. <sup>1</sup>H NMR (400 MHz, CDCl<sub>3</sub>) δ: 7.83–7.78 (m, 4H), 7.59–7.55 (m, 2H), 7.49–7.46 (m, 4H), 7.41–7.40 (m, 2H), 7.27–7.26 (m, 3H), 5.02 (s, 2H), 3.91 (t, *J* = 8.0 Hz, 2H), 1.70–1.61 (m, 2H), 0.84 (t, *J* = 8.0 Hz, 3H); <sup>13</sup>C NMR (100 MHz, CDCl<sub>3</sub>) δ: 155.0, 154.8, 148.2, 140.3, 139.1, 135.0, 132.4(d, *J* = 2.7 Hz), 131.8(d, *J* = 9.9 Hz), 130.4, 129.5, 129.3, 128.5(d, *J* = 3.2 Hz), 128.4, 128.2, 54.1, 44.1, 21.3, 10.8; <sup>31</sup>P NMR (162 MHz, CDCl<sub>3</sub>) δ: 22.4 (s); HRMS (ESI): *m/z* calcd for C<sub>25</sub>H<sub>24</sub>N<sub>3</sub>NaO<sub>3</sub>P<sup>+</sup> [M+Na]<sup>+</sup> 468.1447. Found 468.1447.

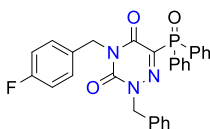

2-benzyl-6-(diphenylphosphoryl)-4-(4-fluorobenzyl)-1,2,4-triazine-3,5(2H,4H)-dione (**3m**). a white solid (81% yield, 82.3 mg). m. p. = 146-147 °C. <sup>1</sup>H NMR (400 MHz, CDCl<sub>3</sub>) δ: 7.79–7.73 (m, 4H), 7.61–7.58 (m, 2H), 7.51–7.47 (m, 4H), 7.40–7.39 (m, 2H), 7.27–7.26 (m, 3H), 7.14 (t, *J* = 8.0 Hz, 2H), 6.96 (t, *J* = 8.0 Hz, 2H), 4.99 (s, 2H), 4.99 (s, 2H); <sup>13</sup>C NMR (100 MHz, CDCl<sub>3</sub>) δ: 164.0, 161.6, 154.7, 154.6, 148.1, 141.3, 140.0, 134.8, 132.5(d, *J* = 3.3 Hz), 131.8(d, *J* = 9.7 Hz), 131.1(d, *J* = 8.7 Hz), 130.3(d, *J* = 3.0 Hz), 130.2, 129.6, 129.1, 128.6(d, *J* = 1.2 Hz), 128.4, 128.3, 115.8, 115.6, 55.0, 44.2; <sup>31</sup>P NMR (162 MHz, CDCl<sub>3</sub>) δ: 22.8 (s); HRMS (ESI): *m/z* calcd for C<sub>29</sub>H<sub>23</sub>FN<sub>3</sub>NaO<sub>3</sub>P<sup>+</sup> [M+Na]<sup>+</sup> 534.1353. Found 534.1353.

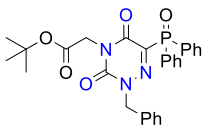

tert-butyl 2-(2-benzyl-6-(diphenylphosphoryl)-3,5-dioxo-2,5-dihydro-1,2,4-triazin-4(3H)-yl)acetate (**3n**). a white solid (75% yield, 77.8 mg). m. p. = 144-145 °C. <sup>1</sup>H NMR (400 MHz, CDCl<sub>3</sub>) δ: 7.85–7.80 (m, 4H), 7.59–7.56 (m, 2H), 7.49–7.45 (m, 4H), 7.37–7.36 (m, 2H), 7.27–7.26 (m, 3H), 5.02 (s, 2H), 4.62 (s, 2H), 1.42 (s, 9H); <sup>13</sup>C NMR (100 MHz, CDCl<sub>3</sub>) δ: 165.7, 155.0, 154.8, 148.3, 141.3, 140.0, 134.8, 132.5(d, *J* = 2.8 Hz), 131.9(d, *J* = 10.0 Hz), 130.2, 129.3, 129.1, 128.6, 128.4, 128.2, 83.3, 54.0, 44.1, 27.9; <sup>31</sup>P NMR (162 MHz, CDCl<sub>3</sub>) δ: 21.8 (s); HRMS (ESI): *m/z* calcd for C<sub>28</sub>H<sub>28</sub>N<sub>3</sub>NaO<sub>5</sub>P<sup>+</sup> [M+Na]<sup>+</sup> 540.1659. Found 540.1659.

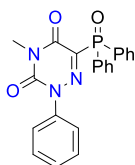

6-(diphenylphosphoryl)-4-methyl-2-phenyl-1,2,4-triazine-3,5(2H,4H)-dione (**3o**). a white solid (88% yield, 71.3 mg). m. p. = 236-237 °C. <sup>1</sup>H NMR (400 MHz, CDCl<sub>3</sub>) δ: 7.92–7.87 (m, 4H), 7.59–7.55 (m, 2H), 7.50–7.44 (m, 7H), 7.17 (d, *J* = 4.0 Hz, 2H), 3.76 (s, 3H); <sup>13</sup>C NMR (100 MHz, CDCl<sub>3</sub>) δ: 155.1, 154.9, 148.2, 141.2, 139.9, 132.6(d, *J* = 1.7 Hz), 132.0(d, *J* = 1.0 Hz), 130.2, 129.5(d, *J* = 3.3 Hz), 129.1, 128.5(d, *J* = 12.7 Hz), 127.6, 40.7; <sup>31</sup>P NMR (162 MHz, CDCl<sub>3</sub>) δ: 22.4 (s); HRMS (ESI): *m/z* calcd for C<sub>22</sub>H<sub>18</sub>N<sub>3</sub>NaO<sub>3</sub>P<sup>+</sup> [M+Na]<sup>+</sup> 448.1047. Found 448.1047.

2 MHz, CDCl<sub>3</sub>) δ: 21.2 (s); HRMS (ESI): m/z calcd for C<sub>22</sub>H<sub>18</sub>N<sub>3</sub>NaO<sub>3</sub>P<sup>+</sup> [M+Na]<sup>+</sup> 426.0978. Found 426.0978.

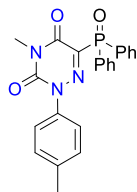

6-(diphenylphosphoryl)-4-methyl-2-(p-tolyl)-1,2,4-triazine-3,5(2H,4H)-dione (**3p**). a white solid (94% yield, 78.2 mg). m. p. = 210-211 °C. <sup>1</sup>H NMR (400 MHz, CDCl<sub>3</sub>) δ: 7.93–7.88 (m, 4 H), 7.58–7.55 (m, 2H), 7.50–7.46 (m, 4H), 7.25 (d, *J* = 8.0 Hz, 2H), 7.04 (d, *J* = 8.0 Hz, 2 H), 3.75 (s, 3H), 2.35 (s, 3H); <sup>13</sup>C NMR (100 MHz, CDCl<sub>3</sub>) δ: 155.2, 155.0, 148.3, 141.0, 13 9.7(d, *J* = 7.2 Hz), 132.5(d, *J* = 2.3 Hz), 132.0(d, *J* = 9.3 Hz), 130.2, 129.3, 129.1, 128.5(d, *J* = 12.4 Hz), 127.3, 40.7, 21.2; <sup>31</sup>P NMR (162 MHz, CDCl<sub>3</sub>) δ: 21.2 (s); HRMS (ESI): m/z calcd for C<sub>23</sub>H<sub>20</sub>N<sub>3</sub>NaO<sub>3</sub>P<sup>+</sup> [M+Na]<sup>+</sup> 440.1134. Found 440.1133.

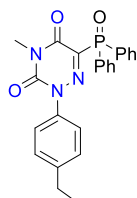

6-(diphenylphosphoryl)-2-(4-ethylphenyl)-4-methyl-1,2,4-triazine-3,5(2H,4H)-dione (**3q**). a white solid (92% yield, 79.7 mg). m. p. = 170-171 °C. <sup>1</sup>H NMR (400 MHz, CDCl<sub>3</sub>) δ: 7.93–7.88 (m, 4H), 7.58–7.55 (m, 2H), 7.50–7.46 (m, 4H), 7.28 (d, *J* = 12.0 Hz, 2H), 7.07 (d, *J* = 8.0 Hz, 2H), 3.76 (s, 3H), 2.66 (q, *J* = 8.0 Hz, 2H), 1.22 (t, *J* = 8.0 Hz, 3H); <sup>13</sup>C NMR (100 MHz, CDCl<sub>3</sub>) δ: 155.3, 155.1, 148.4, 145.8, 141.0, 139.8, 132.5(d, *J* = 3.6 Hz), 132.0(d, *J* = 11.2 Hz), 130.2, 129.5, 129.1, 129.0, 128.5(d, *J* = 11.6 Hz), 127.3, 40.7, 28.5, 15.1; <sup>31</sup>P NMR (162 MHz, CDCl<sub>3</sub>) δ: 21.1 (s); HRMS (ESI): m/z calcd for C<sub>24</sub>H<sub>22</sub>N<sub>3</sub>NaO<sub>3</sub>P<sup>+</sup> [M+Na]<sup>+</sup> 454.1291. Found 454.1291.

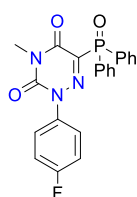

6-(diphenylphosphoryl)-2-(4-fluorophenyl)-4-methyl-1,2,4-triazine-3,5(2H,4H)-dione (**3r**). a white solid (90% yield, 75.8 mg). m. p. = 184-185 °C. <sup>1</sup>H NMR (400 MHz, CDCl<sub>3</sub>) δ: 7.91–7.86 (m, 4H), 7.60–7.56 (m, 2H), 7.50–7.47 (m, 4H), 7.16–7.11 (m, 4H), 3.74 (s, 3H); <sup>13</sup>C NMR (100 MHz, CDCl<sub>3</sub>) δ: 164.0, 161.6, 155.1, 154.9, 148.2, 141.2, 139.9, 132.6(d, *J* = 2.7 Hz), 132.0(d, *J* = 9.9 Hz), 130.1, 129.7(d, *J* = 9.3 Hz), 129.0, 128.6(d, *J* = 13.1 Hz), 127.8, 116.7, 116.5, 40.7; <sup>31</sup>P NMR (162 MHz, CDCl<sub>3</sub>) δ: 21.3 (s); HRMS (ESI): m/z calcd for C<sub>22</sub>H<sub>17</sub>FN<sub>3</sub>NaO<sub>3</sub>P<sup>+</sup> [M+Na]<sup>+</sup> 444.0884. Found 444.0882.

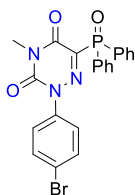

2-(4-bromophenyl)-6-(diphenylphosphoryl)-4-methyl-1,2,4-triazine-3,5(2H,4H)-dione (**3s**). a white solid (93% yield, 89.3 mg). m. p. = 155-156 °C. <sup>1</sup>H NMR (400 MHz, CDCl<sub>3</sub>) δ: 7.91–7.86 (m, 4H), 7.58–7.57 (m, 4H), 7.51–7.47 (m, 4H), 7.05 (d, *J* = 8.0 Hz, 2H), 3.75 (s, 3H); <sup>13</sup>C NMR (100 MHz, CDCl<sub>3</sub>) δ: 154.9, 154.7, 148.0, 141.2, 140.0, 132.7, 132.6(d, *J* = 2.8 Hz), 132.0(d, *J* = 11.4 Hz), 131.0, 130.1, 129.4, 129.0, 128.6(d, *J* = 13.8 Hz), 123.7, 40.7; <sup>31</sup>P NMR (162 MHz, CDCl<sub>3</sub>) δ: 21.2 (s); HRMS (ESI): *m/z* calcd for C<sub>22</sub>H<sub>17</sub>BrN<sub>3</sub>NaO<sub>3</sub>P<sup>+</sup> [M+Na]<sup>+</sup> 504.0083. Found 504.0082.

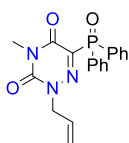

2-allyl-6-(diphenylphosphoryl)-4-methyl-1,2,4-triazine-3,5(2H,4H)-dione (**3t**). a white solid (94% yield, 69.0 mg). m. p. = 152-153 °C. <sup>1</sup>H NMR (400 MHz, CDCl<sub>3</sub>) δ: 7.87–7.82 (m, 4H), 7.59–7.55 (m, 2H), 7.51–7.47 (m, 4H), 5.83–5.73 (m, 1H), 5.29–5.19 (m, 4H), 4.45 (d, *J* = 4.0 Hz, 2H), 3.68 (s, 3H); <sup>13</sup>C NMR (100 MHz, CDCl<sub>3</sub>) δ: 154.9, 154.7, 148.1, 140.3, 139.1, 132.5(d, *J* = 1.9 Hz), 131.9(d, *J* = 11.2 Hz), 130.3, 129.6, 129.2, 128.5(d, *J* = 11.8 Hz), 120.0, 42.9, 40.5; <sup>31</sup>P NMR (162 MHz, CDCl<sub>3</sub>) δ: 21.6 (s); HRMS (ESI): *m/z* calcd for C<sub>19</sub>H<sub>18</sub>N<sub>3</sub>NaO<sub>3</sub>P<sup>+</sup> [M+Na]<sup>+</sup> 390.0978. Found 390.0977.

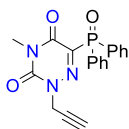

6-(diphenylphosphoryl)-4-methyl-2-(prop-2-yn-1-yl)-1,2,4-triazine-3,5(2H,4H)-dione (**3u**). a white solid (95% yield, 69.3 mg). m. p. = 155-156 °C. <sup>1</sup>H NMR (400 MHz, CDCl<sub>3</sub>) δ: 7.88–7.83 (m, 4H), 7.60–7.56 (m, 2H), 7.51–7.47 (m, 4H), 4.60 (s, 2H), 3.71 (s, 3H), 2.19–2.17 (m, 1H); <sup>13</sup>C NMR (100 MHz, CDCl<sub>3</sub>) δ: 154.3, 154.1, 147.6, 140.4, 139.2, 132.6(d, *J* = 2.4 Hz), 131.9(d, *J* = 9.9 Hz), 130.7, 130.6, 130.1, 129.0, 128.8, 128.6(d, *J* = 13.2 Hz), 75.9, 72.0, 40.5, 29.9; <sup>31</sup>P NMR (162 MHz, CDCl<sub>3</sub>) δ: 21.4 (s); HRMS (ESI): *m/z* calcd for C<sub>19</sub>H<sub>16</sub>N<sub>3</sub>NaO<sub>3</sub>P<sup>+</sup> [M+Na]<sup>+</sup> 388.0821. Found 388.0821.

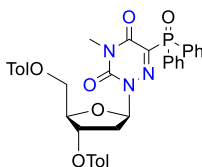

(2R,3S,5S)-5-(6-(diphenylphosphoryl)-4-methyl-3,5-dioxo-4,5-dihydro-1,2,4-triazin-2(3H)-yl)-2-(((4-methylbenzoyl)oxy)methyl)tetrahydrofuran-3-yl 4-methylbenzoate (**3v**). a white solid (83% yield, 112.6 mg). m. p. = 115-116 °C. <sup>1</sup>H NMR (400 MHz, CDCl<sub>3</sub>) δ: 7.94–7.89 (m, 6H), 7.84–7.79 (m, 2H), 7.60–7.51 (m, 6H), 7.22 (t, *J* = 8.0 Hz, 4H), 6.67 (t, *J* = 8.0 Hz, 1H), 4.81–4.77 (m, 1H), 4.40–4.36 (m, 1H), 4.13–4.08 (m, 1H), 3.90–3.86 (m, 1H), 3.31 (s, 3H), 2.67–2.60

(m, 1H), 2.43–2.36 (m, 7H);  $^{13}\text{C}$  NMR (100 MHz,  $\text{CDCl}_3$ )  $\delta$ : 166.1, 165.7, 154.6, 154.4, 148.4, 144.3, 143.9, 142.5, 141.2, 132.7(d,  $J = 2.0$  Hz), 132.6(d,  $J = 3.0$  Hz), 132.0(d,  $J = 10.2$  Hz), 131.6(d,  $J = 10.3$  Hz), 130.3, 129.7(d,  $J = 1.3$  Hz), 129.3, 129.2(d,  $J = 10.7$  Hz), 129.0, 128.8, 128.7, 128.2, 126.9, 126.4, 87.7, 82.8, 75.0, 64.4, 35.0, 27.2, 21.7, 21.6;  $^{31}\text{P}$  NMR (162 MHz,  $\text{CDCl}_3$ )  $\delta$ : 24.2 (s); HRMS (ESI):  $m/z$  calcd for  $\text{C}_{37}\text{H}_{34}\text{N}_3\text{NaO}_8\text{P}^+$   $[\text{M}+\text{Na}]^+$  702.1976. Found 702.1977.

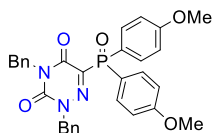

*2,4-dibenzyl-6-(bis(4-methoxyphenyl)phosphoryl)-1,2,4-triazine-3,5(2H,4H)-dione (3w)*. a white solid (90% yield, 99.2 mg). m. p. = 173–174 °C.  $^1\text{H}$  NMR (400 MHz,  $\text{CDCl}_3$ )  $\delta$ : 7.70–7.65 (m, 4H), 7.41–7.39 (m, 2H), 7.31–7.23 (m, 8H), 6.97 (d,  $J = 8.0$  Hz, 4H), 5.04 (s, 2H), 4.99 (s, 2H), 3.86 (s, 6H);  $^{13}\text{C}$  NMR (100 MHz,  $\text{CDCl}_3$ )  $\delta$ : 162.8(d,  $J = 2.8$  Hz), 154.8, 154.7, 148.2, 141.6, 140.3, 135.0, 134.6, 133.8(d,  $J = 12.8$  Hz), 129.6, 129.1, 128.7, 128.5(d,  $J = 3.7$  Hz), 128.2, 121.6, 120.5, 114.1(d,  $J = 14.4$  Hz), 55.8, 55.3, 44.1;  $^{31}\text{P}$  NMR (162 MHz,  $\text{CDCl}_3$ )  $\delta$ : 22.7 (s); HRMS (ESI):  $m/z$  calcd for  $\text{C}_{31}\text{H}_{28}\text{N}_3\text{NaO}_5\text{P}^+$   $[\text{M}+\text{Na}]^+$  576.1659. Found 576.1660.

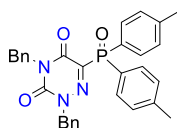

*2,4-dibenzyl-6-(di-p-tolylphosphoryl)-1,2,4-triazine-3,5(2H,4H)-dione (3x)*. a white solid (93% yield, 97.4 mg). m. p. = 177–178 °C.  $^1\text{H}$  NMR (400 MHz,  $\text{CDCl}_3$ )  $\delta$ : 7.71–7.66 (m, 4H), 7.45–7.44 (m, 2H), 7.35–7.31 (m, 10H), 7.25–7.23 (m, 2H), 5.07 (s, 2H), 5.03 (s, 2H), 2.46 (s, 6 H);  $^{13}\text{C}$  NMR (100 MHz,  $\text{CDCl}_3$ )  $\delta$ : 154.8, 154.6, 148.1, 142.9, 142.9, 141.4, 140.1, 134.9, 134.6, 131.8(d,  $J = 11.4$  Hz), 129.6, 129.3, 129.1, 128.7, 128.5(d,  $J = 3.5$  Hz), 128.2, 127.1, 126.0, 55.8, 44.1, 21.7;  $^{31}\text{P}$  NMR (162 MHz,  $\text{CDCl}_3$ )  $\delta$ : 23.1 (s); HRMS (ESI):  $m/z$  calcd for  $\text{C}_{31}\text{H}_{28}\text{N}_3\text{NaO}_5\text{P}^+$   $[\text{M}+\text{Na}]^+$  544.1760. Found 544.1759.

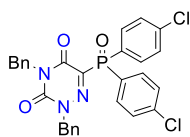

*2,4-dibenzyl-6-(bis(4-chlorophenyl)phosphoryl)-1,2,4-triazine-3,5(2H,4H)-dione (3y)*. a white solid (33% yield, 36.5 mg). m. p. = 225–226 °C.  $^1\text{H}$  NMR (400 MHz,  $\text{CDCl}_3$ )  $\delta$ : 7.69–7.64 (m, 4H), 7.47–7.45 (m, 4H), 7.41–7.40 (m, 2H), 7.33–7.26 (m, 6H), 7.19–7.17 (m, 2H), 5.05 (s, 2H), 5.00 (s, 2H);  $^{13}\text{C}$  NMR (100 MHz,  $\text{CDCl}_3$ )  $\delta$ : 154.8, 154.6, 148.0, 140.2, 139.4, 139.3, 138.9, 134.7, 134.3, 133.1(d,  $J = 11.7$  Hz), 129.6, 129.2, 129.1, 128.9, 128.8, 128.7(d,  $J = 5.6$  Hz), 128.4(d,  $J = 5.4$  Hz), 127.3, 55.9, 44.3;  $^{31}\text{P}$  NMR (162 MHz,  $\text{CDCl}_3$ )  $\delta$ : 21.0 (s); HRMS (ESI):  $m/z$  calcd for  $\text{C}_{29}\text{H}_{22}\text{Cl}_2\text{N}_3\text{NaO}_3\text{P}^+$   $[\text{M}+\text{Na}]^+$  584.0668. Found 584.0669.

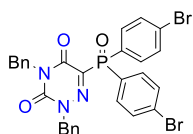

*2,4-dibenzyl-6-(bis(4-bromophenyl)phosphoryl)-1,2,4-triazine-3,5(2H,4H)-dione (3z)*. a white solid (28% yield, 35.2 mg). m. p. = 247-248 °C. <sup>1</sup>H NMR (400 MHz, CDCl<sub>3</sub>) δ: 7.61–7.55 (m, 8H), 7.41–7.39 (m, 2H), 7.32–7.26 (m, 6H), 7.18–7.17 (m, 2H), 5.04 (s, 2H), 5.00 (s, 2H); <sup>13</sup>C NMR (100 MHz, CDCl<sub>3</sub>) δ: 154.7, 154.5, 148.0, 140.1, 138.8, 134.7, 134.2, 133.2(d, *J* = 1.0 Hz), 133.0, 132.1, 131.9(d, *J* = 14.0 Hz), 129.6, 129.2, 128.8(d, *J* = 6.1 Hz), 128.6(d, *J* = 6.1 Hz), 128.4, 128.0(d, *J* = 4.1 Hz), 127.7, 55.9, 44.3; <sup>31</sup>P NMR (162 MHz, CDCl<sub>3</sub>) δ: 21.4 (s); HRMS (ESI): *m/z* calcd for C<sub>29</sub>H<sub>22</sub>Br<sub>2</sub>N<sub>3</sub>NaO<sub>3</sub>P<sup>+</sup> [M+Na]<sup>+</sup> 671.9658. Found 671.9657.

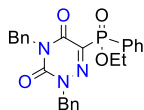

*ethyl (2,4-dibenzyl-3,5-dioxo-2,3,4,5-tetrahydro-1,2,4-triazin-6-yl)(phenyl)phosphinate (3aa)*. a white solid (49% yield, 45.6 mg). m. p. = 132-133 °C. <sup>1</sup>H NMR (400 MHz, CDCl<sub>3</sub>) δ: 7.94–7.88 (m, 2H), 7.63–7.58 (m, 1H), 7.52–7.47 (m, 2H), 7.46–7.43 (m, 2H), 7.31–7.27 (m, 6H), 7.24–7.22 (m, 2H), 5.14–5.11 (m, 1H), 5.01 (s, 2H), 4.99–4.96 (m, 1H), 4.38–4.23 (m, 2H), 1.38 (t, *J* = 8.0 Hz, 3H); <sup>13</sup>C NMR (100 MHz, CDCl<sub>3</sub>) δ: 154.6, 154.4, 148.2, 140.5, 138.9, 134.9, 134.6, 132.9(d, *J* = 3.4 Hz), 132.5(d, *J* = 9.5 Hz), 129.6, 129.5, 129.0, 128.7, 128.5(d, *J* = 5.4 Hz), 128.4, 128.2(d, *J* = 3.9 Hz), 128.0, 62.8, 55.8, 44.2, 16.5; <sup>31</sup>P NMR (162 MHz, CDCl<sub>3</sub>) δ: 22.9 (s); HRMS (ESI): *m/z* calcd for C<sub>25</sub>H<sub>24</sub>N<sub>3</sub>NaO<sub>4</sub>P<sup>+</sup> [M+Na]<sup>+</sup> 484.1397. Found 484.1394.

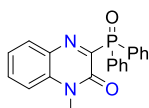

*3-(diphenylphosphoryl)-1-methylquinoxalin-2(1H)-one (3ab)*. a yellow solid (98% yield, 70.8 mg). <sup>1</sup>H NMR (400 MHz, CDCl<sub>3</sub>) δ: 8.02 (d, *J* = 8.0 Hz, 1H), 7.94 (t, *J* = 8.0 Hz, 4H), 7.64 (t, *J* = 8.0 Hz, 1H), 7.53 (d, *J* = 8.0 Hz, 2H), 7.48–7.47 (m, 4H), 7.38–7.32 (m, 2H), 3.61 (s, 3H). The spectral characteristics data were consistent with it reported previously in the literature.<sup>7</sup>

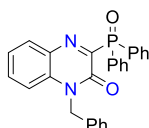

*1-benzyl-3-(diphenylphosphoryl)quinoxalin-2(1H)-one (3ac)*. a yellow solid (97% yield, 84.8 mg). <sup>1</sup>H NMR (400 MHz, CDCl<sub>3</sub>) δ: 8.02–7.97 (m, 4H), 7.95 (s, 1H), 7.58–7.55 (m, 2H), 7.51–7.48 (m, 5H), 7.33–7.25 (m, 5H), 7.15 (d, *J* = 8.0 Hz, 2H), 5.41 (s, 2H). The spectral characteristics data were consistent with it reported previously in the literature.<sup>7</sup>

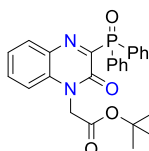

*tert-butyl 2-(3-(diphenylphosphoryl)-2-oxoquinoxalin-1(2H)-yl)acetate (3ad)*. a yellow solid (98% yield, 90.1 mg). m. p. = 183-184 °C. <sup>1</sup>H NMR (400 MHz, CDCl<sub>3</sub>) δ: 8.04 (d, *J* = 8.0 Hz, 1H), 7.96–7.90 (m, 4H), 7.61 (t, *J* = 8.0 Hz, 1H), 7.56–7.52 (m, 2H), 7.48–7.44 (m, 4H), 7.37 (t, *J* = 8.0 Hz, 1H), 7.10 (d, *J* = 8.0 Hz, 1H), 4.85 (s, 2H), 1.37 (s, 9H); <sup>13</sup>C NMR (100 MHz, CDCl<sub>3</sub>) δ: 165.5, 156.4, 155.2, 153.7, 153.5, 133.5, 133.4, 133.2(d, *J* = 1.4 Hz), 133.

1, 132.3, 132.1(d,  $J = 10.8$  Hz), 131.0, 129.9, 128.3(d,  $J = 12.6$  Hz), 124.2, 113.3, 83.3, 43.9, 27.8;  $^{31}\text{P}$  NMR (162 MHz,  $\text{CDCl}_3$ )  $\delta$ : 23.8 (s); HRMS (ESI):  $m/z$  calcd for  $\text{C}_{26}\text{H}_{25}\text{N}_2\text{NaO}_4\text{P}^+$   $[\text{M}+\text{Na}]^+$  483.1444. Found 483.1444.

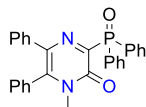

*3-(diphenylphosphoryl)-1-methyl-5,6-diphenylpyrazin-2(1H)-one (3ae)*. a yellow solid (65% yield, 60.2 mg). m. p. = 198-200 °C.  $^1\text{H}$  NMR (400 MHz,  $\text{CDCl}_3$ )  $\delta$ : 8.02–7.97 (m, 4H), 7.90–7.86 (m, 1H), 7.57 (d,  $J = 8.0$  Hz, 2H), 7.54–7.50 (m, 4H), 7.47–7.45 (m, 2H), 7.35–7.30 (m, 1H), 7.24 (d,  $J = 8.0$  Hz, 1H), 7.13–7.05 (m, 3H), 7.00 (d,  $J = 8.0$  Hz, 2H), 3.33 (s, 3H);  $^{13}\text{C}$  NMR (100 MHz,  $\text{CDCl}_3$ )  $\delta$ : 155.3, 155.1, 150.8, 149.5, 142.0, 136.6, 134.3, 134.1, 132.1(d,  $J = 9.6$  Hz), 131.9(d,  $J = 2.4$  Hz), 131.8, 131.7, 131.5(d,  $J = 2.7$  Hz), 131.4, 130.4, 130.1, 129.4(d,  $J = 7.2$  Hz), 129.1, 128.9, 128.8, 128.6, 128.5, 128.2(d,  $J = 12.4$  Hz), 127.6, 127.3, 127.2, 34.2;  $^{31}\text{P}$  NMR (162 MHz,  $\text{CDCl}_3$ )  $\delta$ : 24.7 (s); HRMS (ESI):  $m/z$  calcd for  $\text{C}_{29}\text{H}_{23}\text{N}_2\text{NaO}_2\text{P}^+$   $[\text{M}+\text{Na}]^+$  485.1389. Found 485.1389.

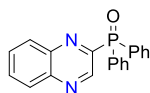

*diphenyl(quinoxalin-2-yl)phosphine oxide (3af)*. a white solid (40% yield, 26.4 mg).  $^1\text{H}$  NMR (400 MHz,  $\text{CDCl}_3$ )  $\delta$ : 9.67 (s, 1H), 8.21–7.18 (m, 2H), 8.02–7.97 (m, 4H), 7.91–7.83 (m, 2H), 7.60–7.57 (m, 2H), 7.53–7.49 (m, 4H). The spectral characteristics data were consistent with it reported previously in the literature.<sup>4</sup>

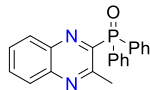

*(3-methylquinoxalin-2-yl)diphenylphosphine oxide (3ag)*. a white solid (60% yield, 41.0 mg).  $^1\text{H}$  NMR (400 MHz,  $\text{CDCl}_3$ )  $\delta$ : 8.02 (d,  $J = 8.0$  Hz, 1H), 7.93 (d,  $J = 8.0$  Hz, 1H), 7.85–7.77 (m, 5H), 7.69–7.66 (m, 1H), 7.57–7.53 (m, 2H), 7.49–7.45 (m, 4H), 2.99 (s, 3H). The spectral characteristics data were consistent with it reported previously in the literature.<sup>4, 5</sup>

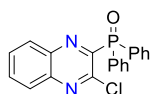

*(3-chloroquinoxalin-2-yl)diphenylphosphine oxide (3ah)*. a white solid (23% yield, 16.8 mg).  $^1\text{H}$  NMR (400 MHz,  $\text{CDCl}_3$ )  $\delta$ : 8.05 (d,  $J = 8.0$  Hz, 1H), 7.96 (d,  $J = 8.0$  Hz, 1H), 7.89–7.86 (m, 1H), 7.83–7.75 (m, 5H), 7.62–7.58 (m, 2H), 7.53–7.49 (m, 4H). The spectral characteristics data were consistent with it reported previously in the literature.<sup>4</sup>

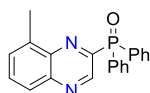

*(8-methylquinoxalin-2-yl)diphenylphosphine oxide (3ai)*. a white solid (28% yield, 19.2 mg). (PET/EtOAc = 4:1 as the eluent).  $^1\text{H}$  NMR (400 MHz,  $\text{CDCl}_3$ )  $\delta$ : 9.64 (s, 1H), 8.01–7.96 (m, 5H), 7.74 (t,  $J = 8.0$  Hz, 1H), 7.64 (d,  $J = 8.0$  Hz, 1H), 7.56–7.52 (m, 2H), 7.49–7.45 (m, 4H), 2.73 (s, 3H). The spectral characteristics data were consistent with it reported previously in the literature.<sup>4</sup>

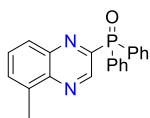

(5-methylquinoxalin-2-yl)diphenylphosphine oxide (**3ai'**). a white solid (25% yield, 17.4 mg). (PET/EtOAc = 1:1 as the eluent).  $^1\text{H}$  NMR (400 MHz,  $\text{CDCl}_3$ )  $\delta$ : 9.60 (s, 1H), 7.98–7.93 (m, 5H), 7.71–7.68 (m, 2H), 7.56–7.52 (m, 2H), 7.49–7.45 (m, 4H), 2.81 (s, 3H). The spectral characteristics data were consistent with it reported previously in the literature.<sup>4</sup>

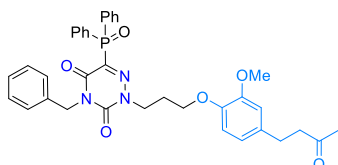

4-benzyl-6-(diphenylphosphoryl)-2-(3-(2-methoxy-4-(3-oxobutyl)phenoxy)propyl)-1,2,4-triazine-3,5(2H,4H)-dione (**3ak**). a white solid (54% yield, 34.4 mg). m. p. = 132–133 °C. (PET/EtOAc = 1:4 as the eluent).  $^1\text{H}$  NMR (400 MHz,  $\text{CDCl}_3$ )  $\delta$ : 7.62–7.57 (m, 4H), 7.41–7.37 (m, 2H), 7.29–7.24 (m, 4H), 7.12–7.09 (m, 3H), 7.05–7.03 (m, 2H), 6.52–6.46 (m, 3H), 4.87 (s, 2H), 3.90 (t,  $J$  = 6.0 Hz, 2H), 3.81 (t,  $J$  = 6.0 Hz, 2H), 3.50 (s, 3H), 2.68–2.64 (m, 2H), 2.58–2.54 (m, 2H), 1.97 (s, 3H), 1.95–1.92 (m, 2H);  $^{13}\text{C}$  NMR (100 MHz,  $\text{CDCl}_3$ )  $\delta$ : 208.0, 155.1, 154.9, 149.3, 148.3, 146.4, 140.6, 139.3, 134.6, 134.0, 132.3(d,  $J$  = 2.5 Hz), 131.8(d,  $J$  = 9.9 Hz), 130.4, 129.3, 129.1, 128.7, 128.5(d,  $J$  = 3.0 Hz), 128.4, 120.0, 113.3, 112.1, 67.2, 56.0, 55.6, 45.4, 39.1, 30.1, 29.3, 26.9;  $^{31}\text{P}$  NMR (162 MHz,  $\text{CDCl}_3$ )  $\delta$ : 22.7 (s); HRMS (ESI):  $m/z$  calc'd for  $\text{C}_{36}\text{H}_{36}\text{N}_3\text{NaO}_6\text{P}^+$  [ $\text{M}+\text{Na}$ ] $^+$  660.2234. Found 660.2236.

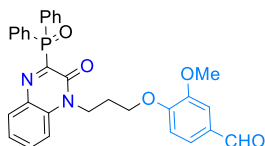

4-(3-(3-(diphenylphosphoryl)-2-oxoquinoxalin-1(2H)-yl)propoxy)-3-methoxybenzaldehyde (**3al**). a white solid (66% yield, 71.3 mg). m. p. = 131–132 °C. (PET/EtOAc = 1:4 as the eluent).  $^1\text{H}$  NMR (400 MHz,  $\text{CDCl}_3$ )  $\delta$ : 9.84 (s, 1H), 8.03 (d,  $J$  = 8.0 Hz, 1H), 7.94–7.89 (m, 4H), 7.59–7.58 (m, 2H), 7.55–7.52 (m, 2H), 7.46–7.41 (m, 5H), 7.38–7.35 (m, 2H), 6.84 (d,  $J$  = 8.0 Hz, 1H), 4.46 (t,  $J$  = 8.0 Hz, 2H), 4.11–4.09 (m, 2H), 3.86 (s, 3H), 2.34–2.28 (m, 2H);  $^{13}\text{C}$  NMR (100 MHz,  $\text{CDCl}_3$ )  $\delta$ : 190.9, 156.3, 155.1, 154.3, 154.0, 153.3, 149.7, 133.8, 133.6, 133.2, 133.0, 132.3, 132.1(d,  $J$  = 4.2 Hz), 131.9, 131.1, 130.4, 130.0, 128.3(d,  $J$  = 12.1 Hz), 126.6, 124.0, 113.9, 111.5, 109.1, 66.2, 55.8, 39.4, 27.0;  $^{31}\text{P}$  NMR (162 MHz,  $\text{CDCl}_3$ )  $\delta$ : 23.9 (s); HRMS (ESI):  $m/z$  calc'd for  $\text{C}_{31}\text{H}_{27}\text{N}_2\text{NaO}_5\text{P}^+$  [ $\text{M}+\text{Na}$ ] $^+$  561.1550. Found 561.1551.

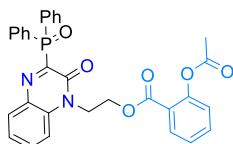

2-(3-(diphenylphosphoryl)-2-oxoquinoxalin-1(2H)-yl)ethyl 2-acetoxybenzoate (**3am**). a white solid (62% yield, 68.7 mg). m. p. = 130–131 °C. (PET/EtOAc = 1:4 as the eluent).  $^1\text{H}$  NMR (400 MHz,  $\text{CDCl}_3$ )  $\delta$ : 8.01 (d,  $J$  = 8.0 Hz, 1H), 7.95–7.90 (m, 4H), 7.84–7.74 (m, 1H), 7.65–7.61 (m, 1H), 7.59–7.52 (m, 3H), 7.48–7.42 (m, 6H), 7.37–7.32 (m, 2H), 4.45–4.42 (m, 2H), 4.

36–4.33 (m, 2H), 1.83 (s, 3H);  $^{13}\text{C}$  NMR (100 MHz,  $\text{CDCl}_3$ )  $\delta$ : 170.7, 156.3, 155.0, 154.1, 153.8, 133.6, 133.4, 133.0, 132.5, 132.3, 132.1(d,  $J = 4.4$  Hz), 131.9, 131.6, 131.5(d,  $J = 2.5$  Hz), 131.4, 131.4, 131.3, 130.9, 129.8, 128.8, 128.6, 128.5, 128.3(d,  $J = 5.9$  Hz), 128.2, 127.2, 126.8, 124.1, 113.7, 60.3, 40.8, 20.5;  $^{31}\text{P}$  NMR (162 MHz,  $\text{CDCl}_3$ )  $\delta$ : 23.9 (s); HRMS (ESI):  $m/z$  calcd for  $\text{C}_{31}\text{H}_{25}\text{N}_2\text{NaO}_6\text{P}^+$   $[\text{M}+\text{NH}_4]^+$  570.1788. Found 570.1786.

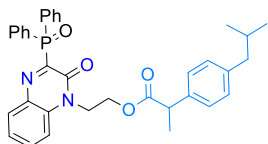

2-(3-(diphenylphosphoryl)-2-oxoquinoxalin-1(2H)-yl)ethyl 2-(4-isobutylphenyl)propanoate (**3an**), a white solid (82% yield, 94.6 mg). m. p. = 145–147 °C. (PET/EtOAc = 1:4 as the eluent).  $^1\text{H}$  NMR (400 MHz,  $\text{CDCl}_3$ )  $\delta$ : 8.01 (d,  $J = 8.0$  Hz, 1H), 7.95–7.90 (m, 4H), 7.57–7.53 (m, 3H), 7.48–7.45 (m, 3H), 7.38 (d,  $J = 8.0$  Hz, 1H), 7.34 (d,  $J = 8.0$  Hz, 1H), 7.20–7.06 (m, 2H), 7.02 (s, 3H), 4.49–4.27 (m, 4H), 3.49–3.41 (m, 1H), 2.41 (d,  $J = 8.0$  Hz, 2H), 1.87–1.78 (m, 1H), 1.34 (d,  $J = 4.0$  Hz, 3H), 0.89 (s, 3H), 0.87 (s, 3H);  $^{13}\text{C}$  NMR (100 MHz,  $\text{CDCl}_3$ )  $\delta$ : 174.6, 156.3, 155.0, 154.0, 153.8, 140.7, 137.0, 133.6, 133.5(d,  $J = 1.5$  Hz), 133.4, 133.0, 132.2, 132.1(d,  $J = 3.9$  Hz), 132.0, 131.0(d,  $J = 4.4$  Hz), 129.9(d,  $J = 4.3$  Hz), 129.4, 129.3, 128.3(d,  $J = 13.0$  Hz), 127.1, 126.9(d,  $J = 7.1$  Hz), 124.0, 113.9, 60.8, 44.9, 44.8, 40.8, 30.1, 22.3, 18.2;  $^{31}\text{P}$  NMR (162 MHz,  $\text{CDCl}_3$ )  $\delta$ : 23.7 (s); HRMS (ESI):  $m/z$  calcd for  $\text{C}_{35}\text{H}_{35}\text{N}_2\text{NaO}_4\text{P}^+$   $[\text{M}+\text{Na}]^+$  601.2227. Found 601.2221.

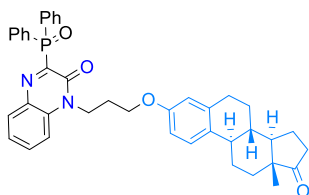

3-(diphenylphosphoryl)-1-(3-(((8S,9R,13R,14R)-13-methyl-17-oxo-7,8,9,11,12,13,14,15,16,17-decahydro-6H-cyclopenta[a]phenanthren-3-yl)oxy)propyl)quinoxalin-2(1H)-one (**3ao**), a white solid (47% yield, 61.2 mg). m. p. = 156–157 °C. (PET/EtOAc = 1:4 as the eluent).  $^1\text{H}$  NMR (400 MHz,  $\text{CDCl}_3$ )  $\delta$ : 8.03 (d,  $J = 8.0$  Hz, 1H), 7.96–7.91 (m, 4H), 7.62 (t,  $J = 8.0$  Hz, 1H), 7.56–7.53 (m, 2H), 7.50–7.45 (m, 5H), 7.36 (t,  $J = 8.0$  Hz, 1H), 7.18 (d,  $J = 8.0$  Hz, 1H), 6.66 (d,  $J = 8.0$  Hz, 1H), 6.59 (s, 1H), 4.39 (t,  $J = 8.0$  Hz, 2H), 3.99 (t,  $J = 8.0$  Hz, 2H), 2.94–2.82 (m, 2H), 2.50 (dd,  $J = 16.0$  Hz,  $J = 8.0$  Hz, 1H), 2.40–2.34 (m, 1H), 2.27–2.14 (m, 4H), 2.11–2.02 (m, 2H), 2.00–1.94 (m, 2H), 1.67–1.59 (m, 1H), 1.54–1.53 (m, 1H), 1.50–1.38 (m, 3H), 0.91 (s, 3H);  $^{13}\text{C}$  NMR (100 MHz,  $\text{CDCl}_3$ )  $\delta$ : 220.8, 156.4, 155.2, 154.1, 153.9, 137.8, 133.7, 133.5, 133.3(d,  $J = 2.0$  Hz), 133.1, 132.5, 132.3, 132.0(d,  $J = 10.1$  Hz), 131.2, 130.1, 128.3(d,  $J = 13.0$  Hz), 126.4, 123.9, 114.5, 113.9, 112.1, 65.1, 50.4, 48.0, 43.9, 39.7, 38.3, 35.8, 31.5, 29.6, 27.1, 26.5, 25.9, 21.5, 13.8;  $^{31}\text{P}$  NMR (162 MHz,  $\text{CDCl}_3$ )  $\delta$ : 23.8 (s); HRMS (ESI):  $m/z$  calcd for  $\text{C}_{41}\text{H}_{41}\text{N}_2\text{NaO}_4\text{P}^+$   $[\text{M}+\text{Na}]^+$  679.2696. Found 679.2697.

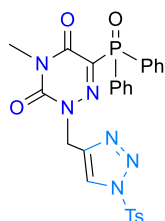



6-(diphenylphosphoryl)-4-methyl-2-((1-tosyl-1*H*-1,2,3-triazol-4-yl)methyl)-1,2,4-triazine-3,5(2*H*,4*H*)-dione (**4**). a white solid (84% yield, 93.9 mg). m. p. = 179-180 °C. (PET/EtOAc = 1:5 as the eluent). <sup>1</sup>H NMR (400 MHz, CDCl<sub>3</sub>) δ: 8.10 (s, 1H), 7.95 (d, *J* = 8.0 Hz, 2H), 7.84–7.79 (m, 4H), 7.59–7.56 (m, 2H), 7.50–7.46 (m, 4H), 7.37 (d, *J* = 8.0 Hz, 2H), 5.14 (s, 2H), 3.66 (s, 3H), 2.44 (s, 3H); <sup>13</sup>C NMR (100 MHz, CDCl<sub>3</sub>) δ: 154.8, 154.6, 147.9, 147.5, 140.7, 140.4, 139.1, 132.7, 132.6(d, *J* = 1.9 Hz), 131.9(d, *J* = 10.4 Hz), 130.4, 130.1, 129.0, 128.8, 128.5(d, *J* = 13.6 Hz), 123.5, 40.6, 35.2, 21.8; <sup>31</sup>P NMR (162 MHz, CDCl<sub>3</sub>) δ: 21.6 (s); HRMS (ESI): *m/z* calcd for C<sub>26</sub>H<sub>23</sub>N<sub>6</sub>NaO<sub>5</sub>PS<sup>+</sup> [M+Na]<sup>+</sup> 585.1080. Found 585.1078.

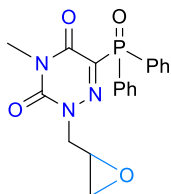

6-(diphenylphosphoryl)-4-methyl-2-(oxiran-2-ylmethyl)-1,2,4-triazine-3,5(2*H*,4*H*)-dione (**5**). a white solid (41% yield, 31.6 mg). m. p. = 104-106 °C. (PET/EtOAc = 1:5 as the eluent). <sup>1</sup>H NMR (400 MHz, CDCl<sub>3</sub>) δ: 7.88–7.83 (m, 4H), 7.59–7.57 (m, 2H), 7.51–7.47 (m, 4H), 4.16–4.12 (m, 1H), 3.99–3.94 (m, 1H), 3.69 (s, 3H), 3.59–3.58 (m, 1H), 2.75–2.73 (m, 1H), 2.62–2.61 (m, 1H); <sup>13</sup>C NMR (100 MHz, CDCl<sub>3</sub>) δ: 155.2, 155.0, 148.4, 140.2, 139.0, 132.6(d, *J* = 3.0 Hz), 132.0(d, *J* = 1.7 Hz), 131.9(d, *J* = 1.7 Hz), 130.0, 129.7, 129.7, 128.9, 128.6(d, *J* = 11.8 Hz), 48.0, 46.3, 42.5, 40.6; <sup>31</sup>P NMR (162 MHz, CDCl<sub>3</sub>) δ: 22.0 (s); HRMS (ESI): *m/z* calcd for C<sub>19</sub>H<sub>18</sub>N<sub>3</sub>NaO<sub>4</sub>P<sup>+</sup> [M+Na]<sup>+</sup> 406.0927. Found 406.0923.

## VII. NMR charts of 3a-5

### 3a-<sup>1</sup>H

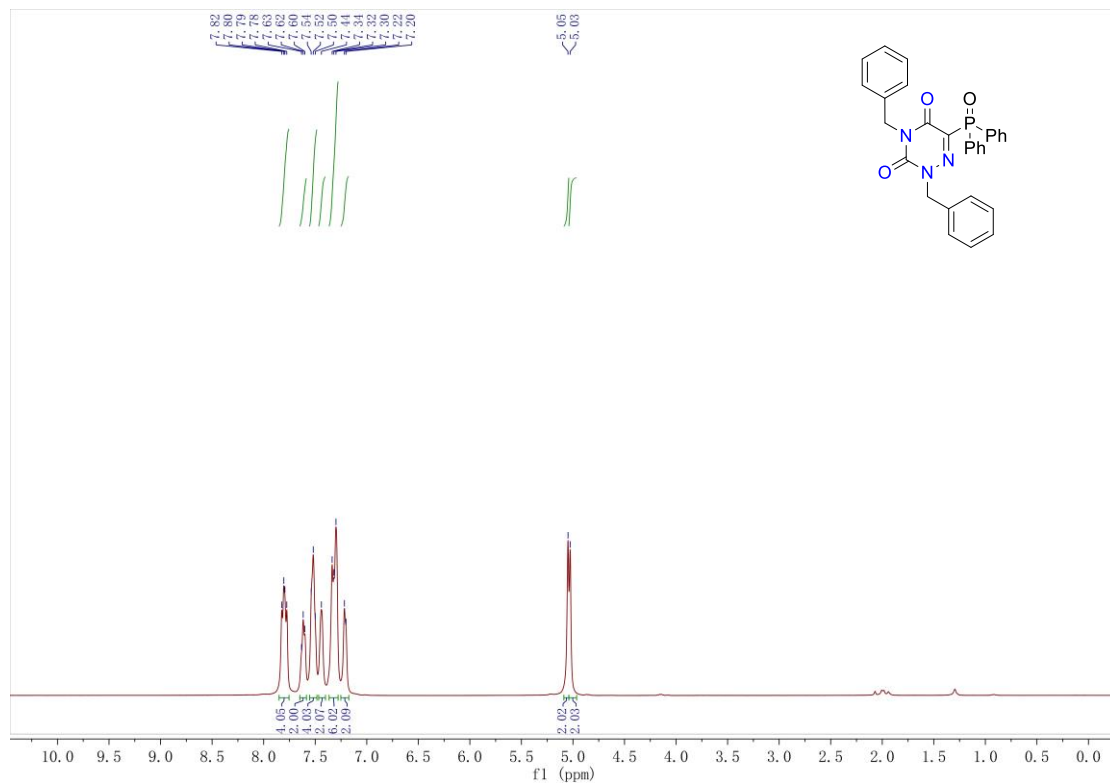

### 3a-<sup>31</sup>P

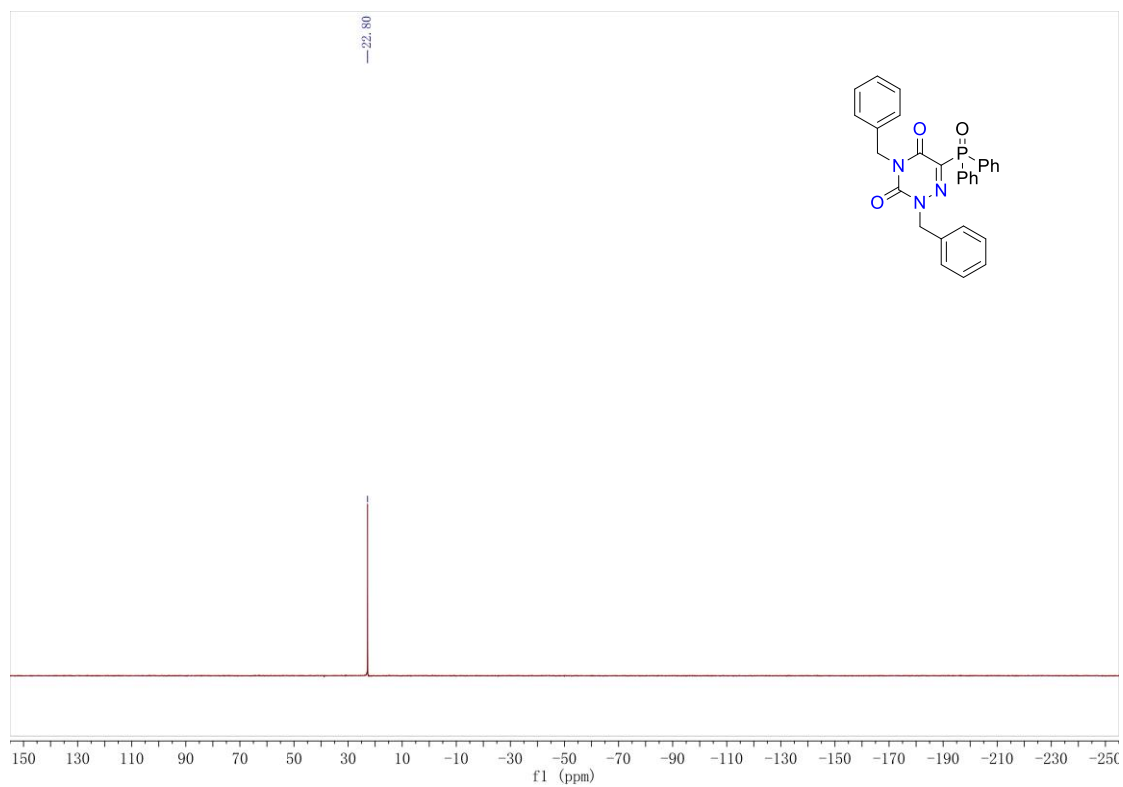

**3a-<sup>13</sup>C**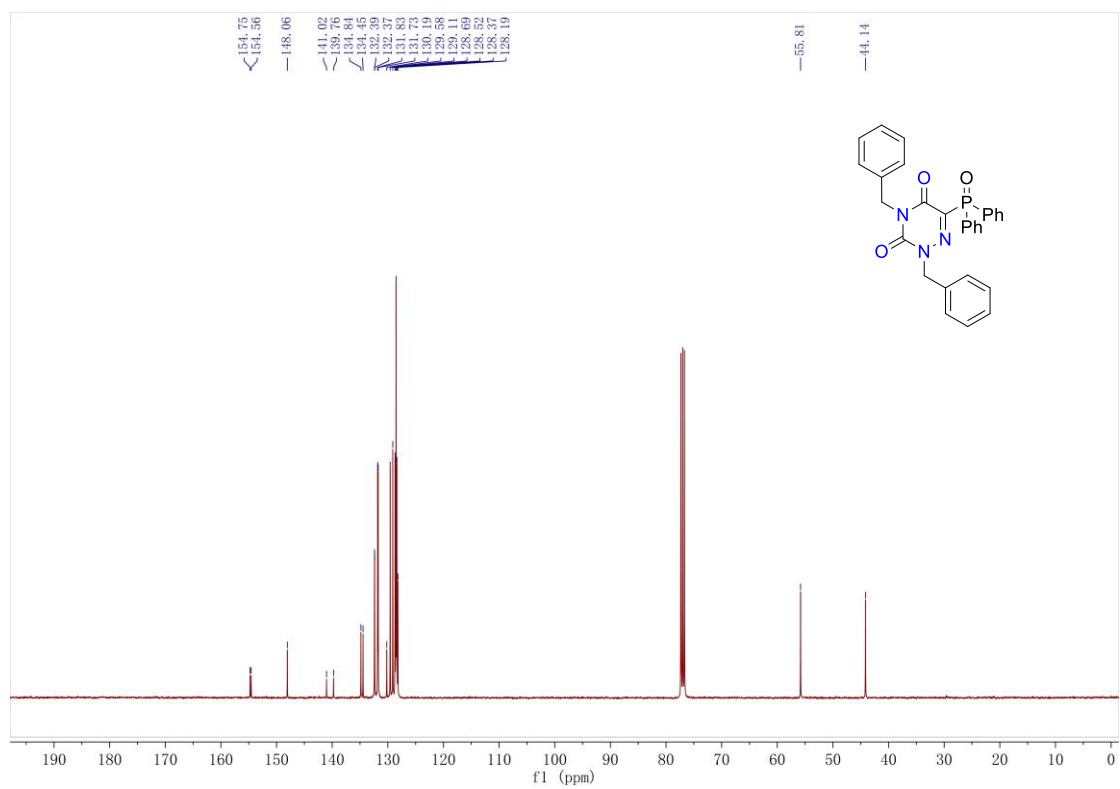**3b-<sup>1</sup>H**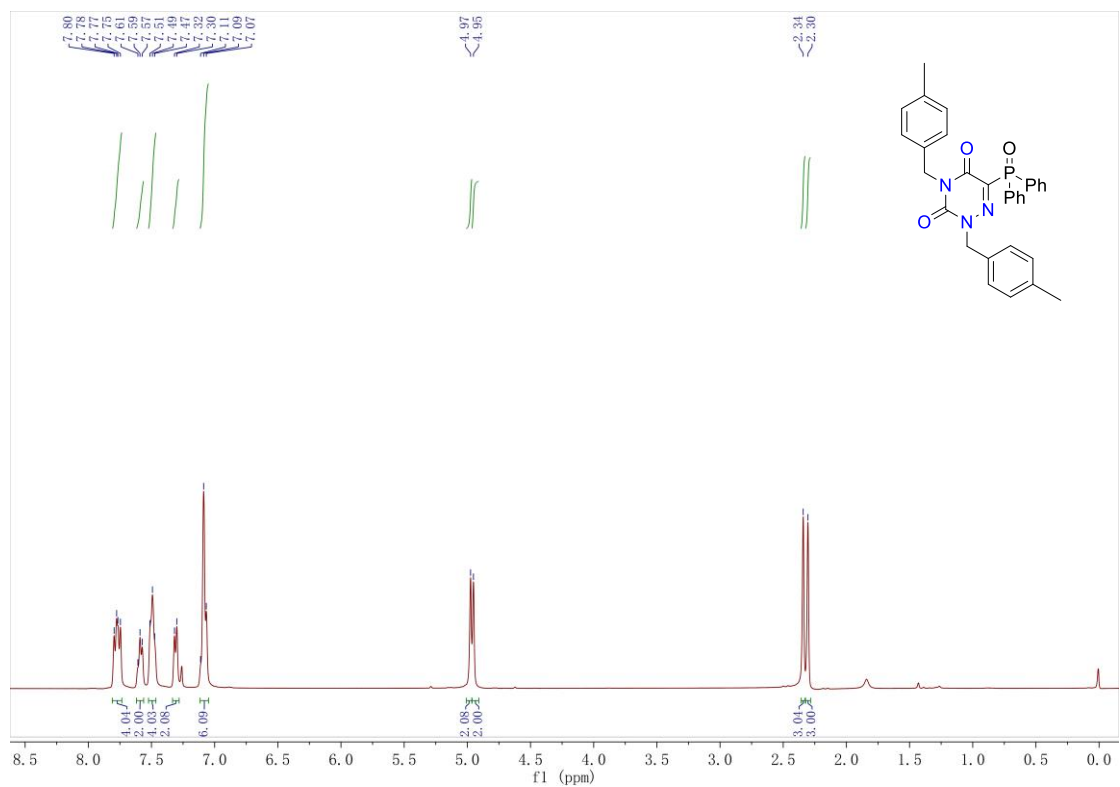

**3b-<sup>31</sup>P**

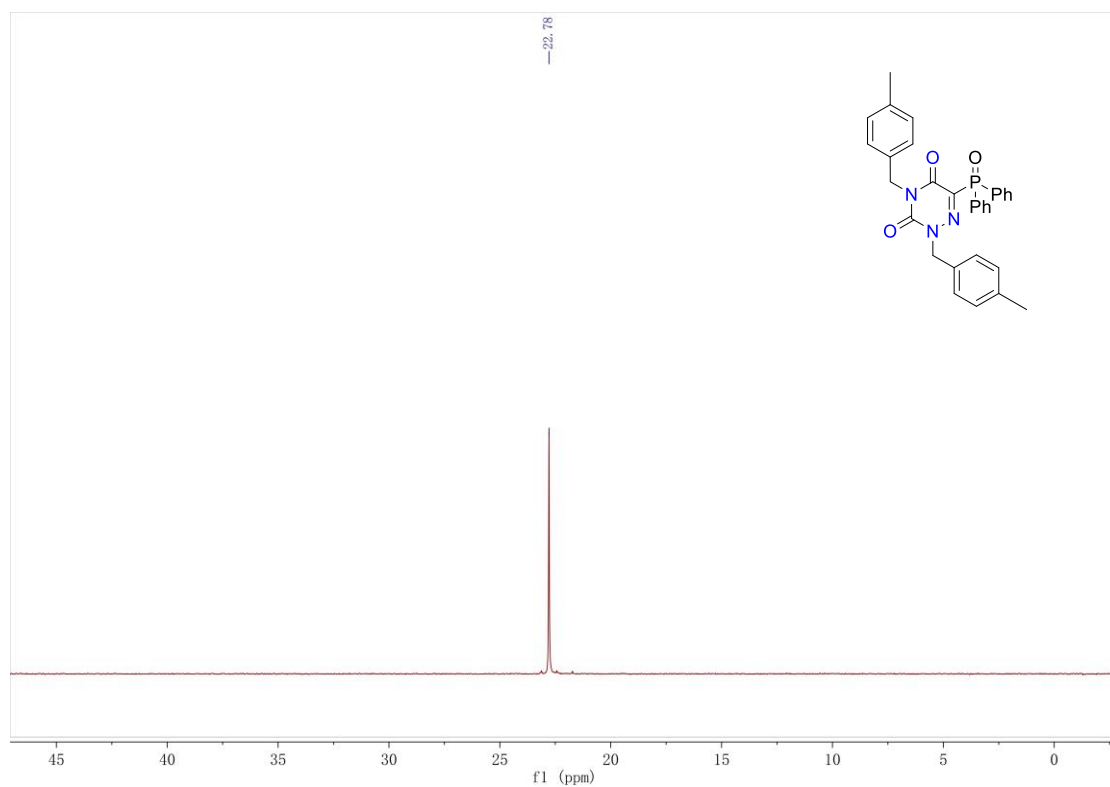

**3b-<sup>13</sup>C**

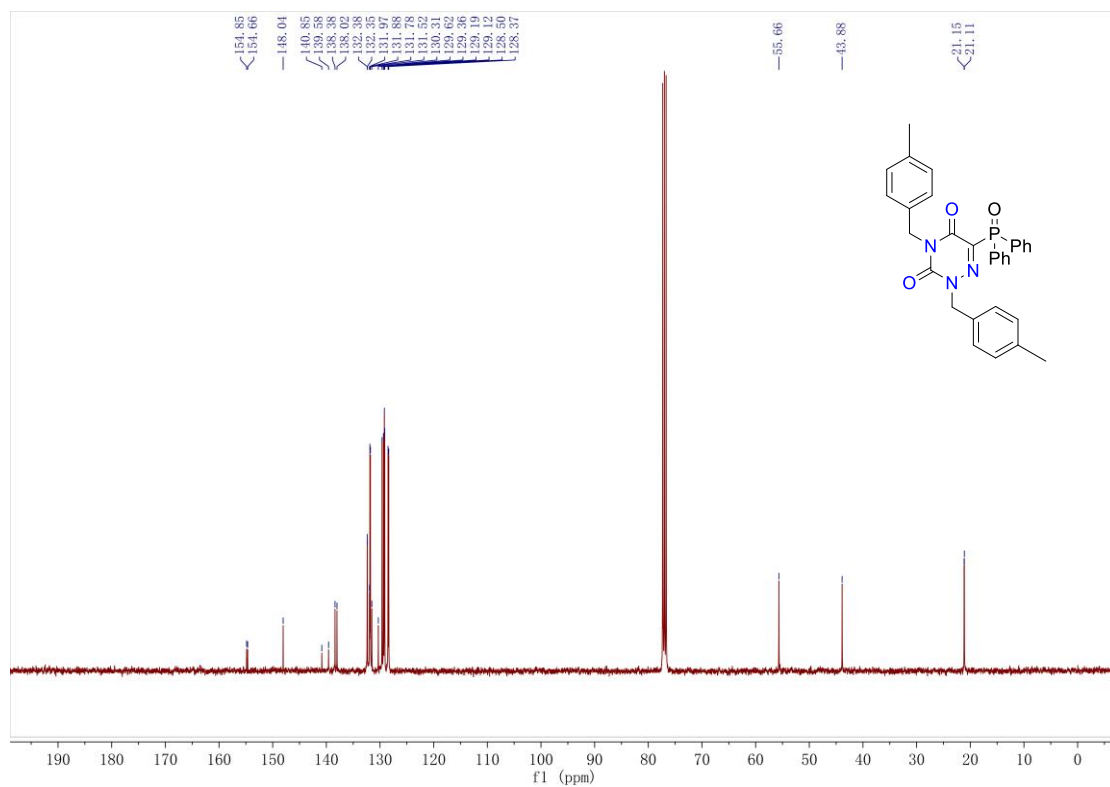

**3c-<sup>1</sup>H**

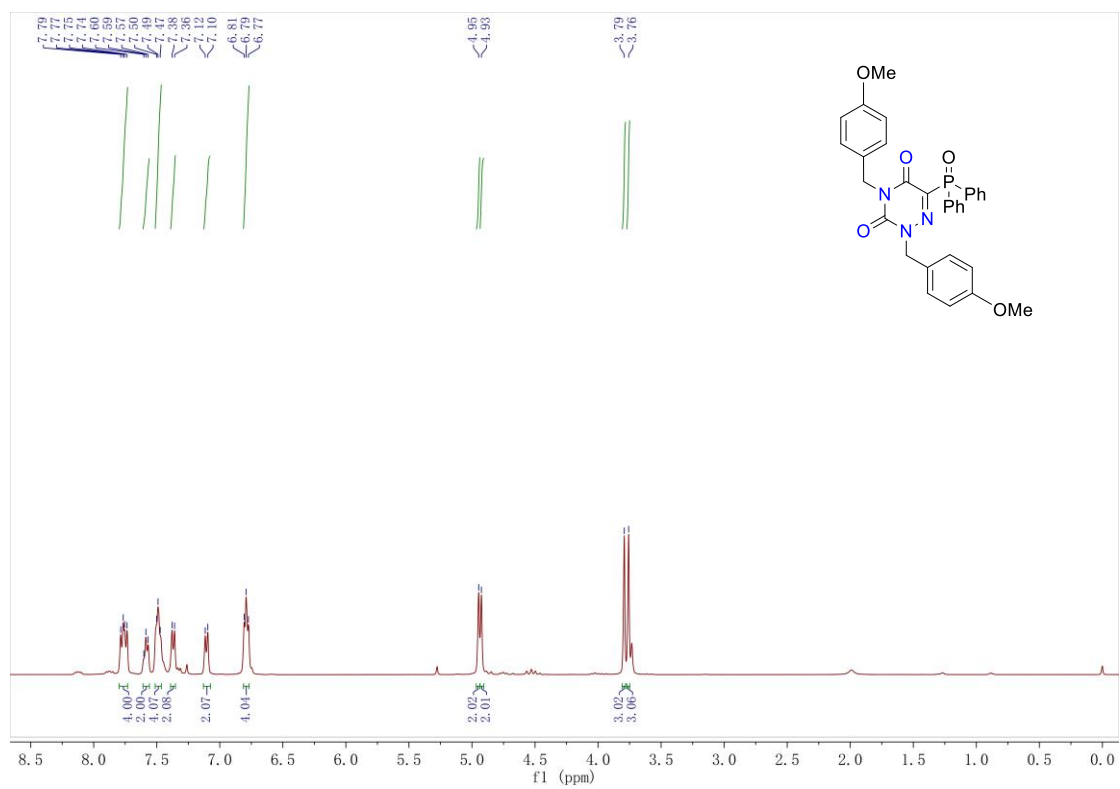

**3c-<sup>31</sup>P**

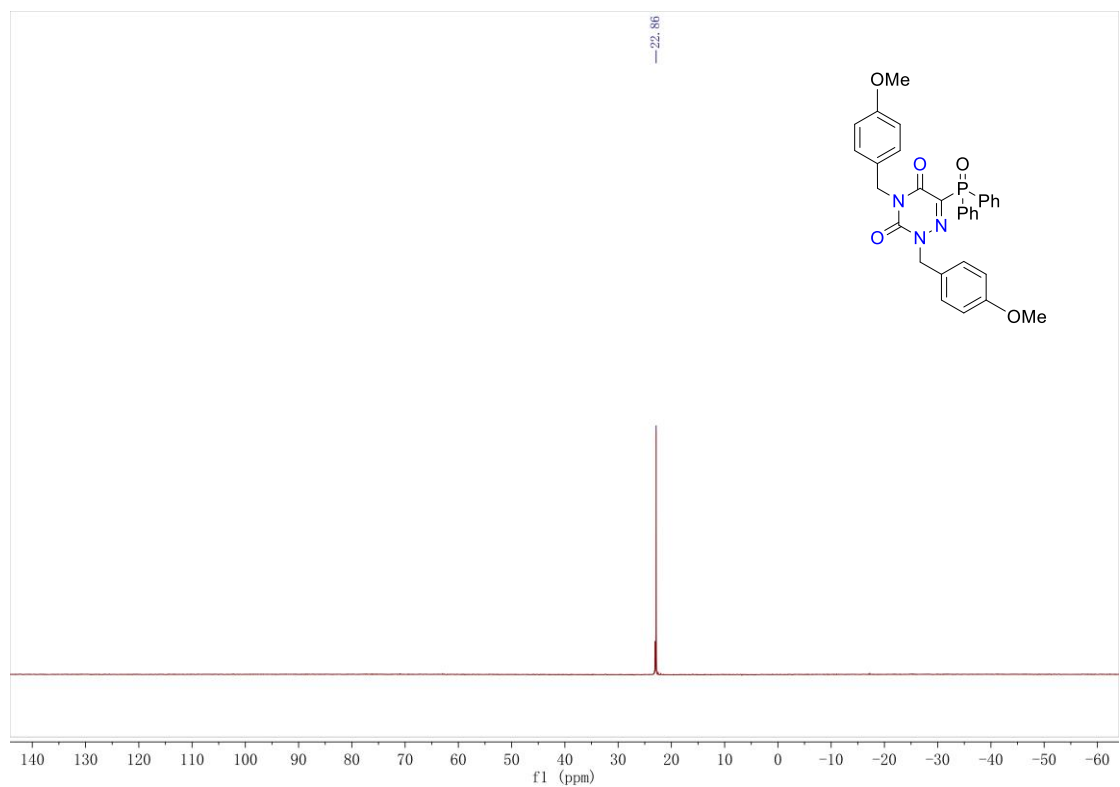

**3c-<sup>13</sup>C**

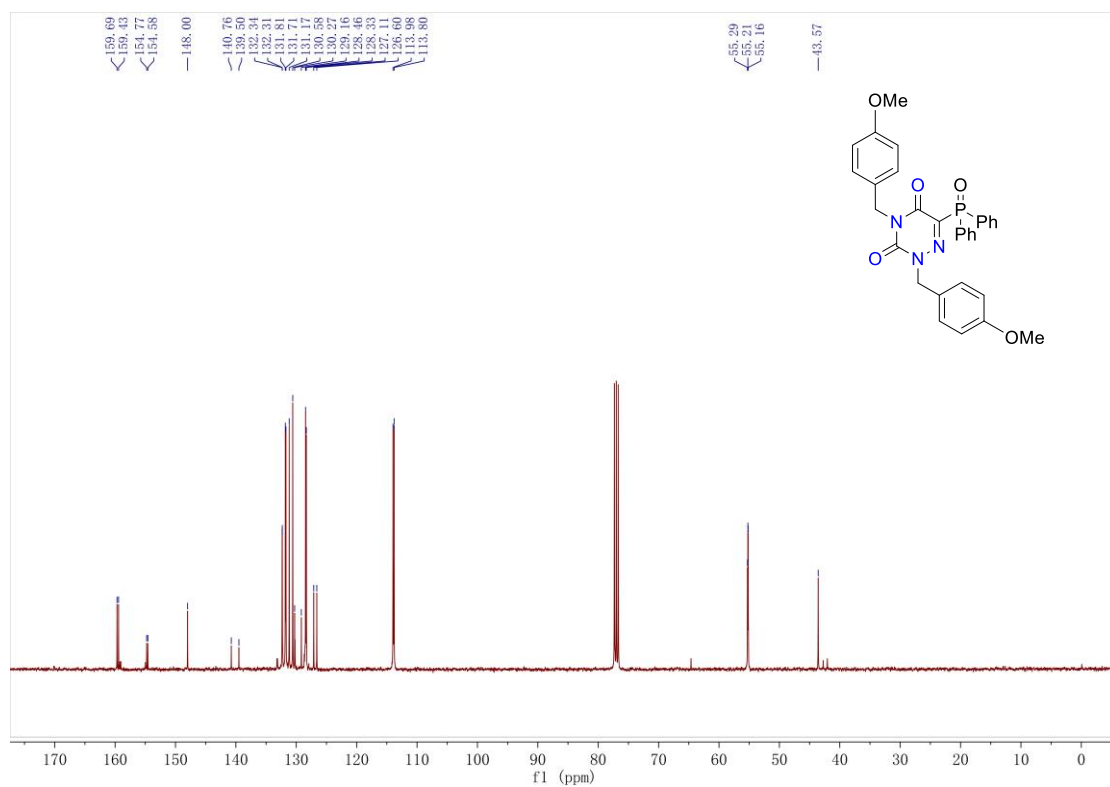

**3d-<sup>1</sup>H**

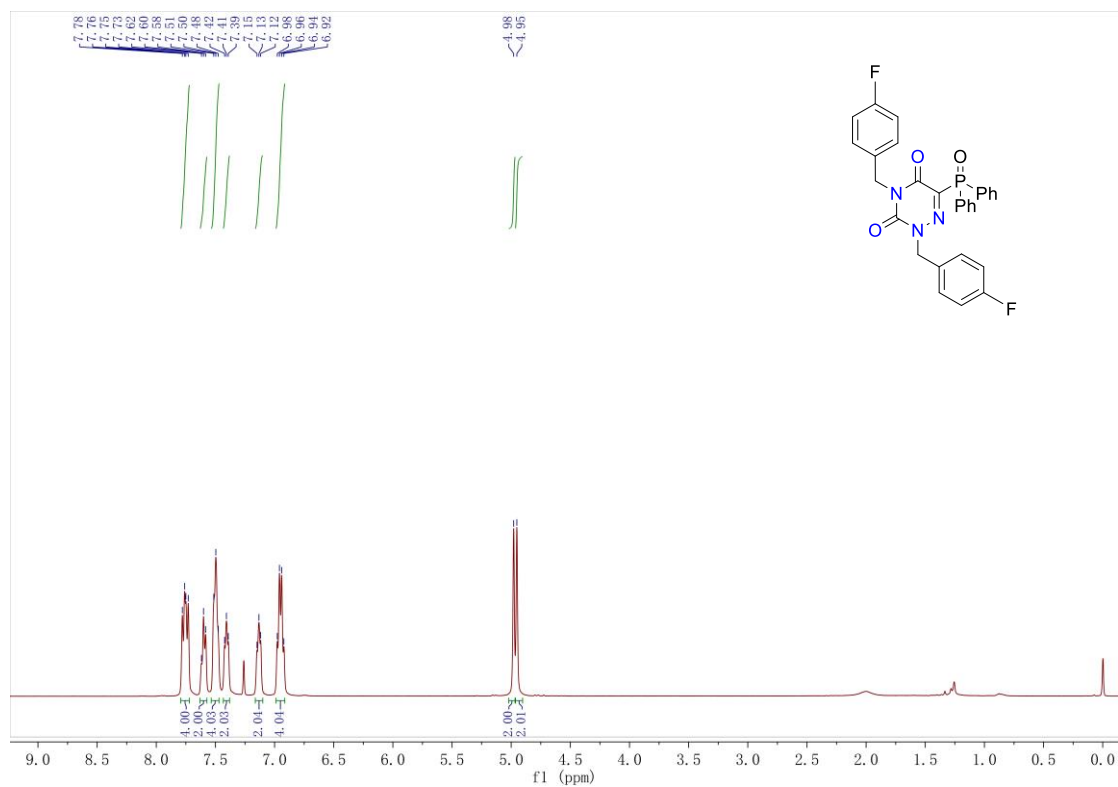

3d-<sup>31</sup>P

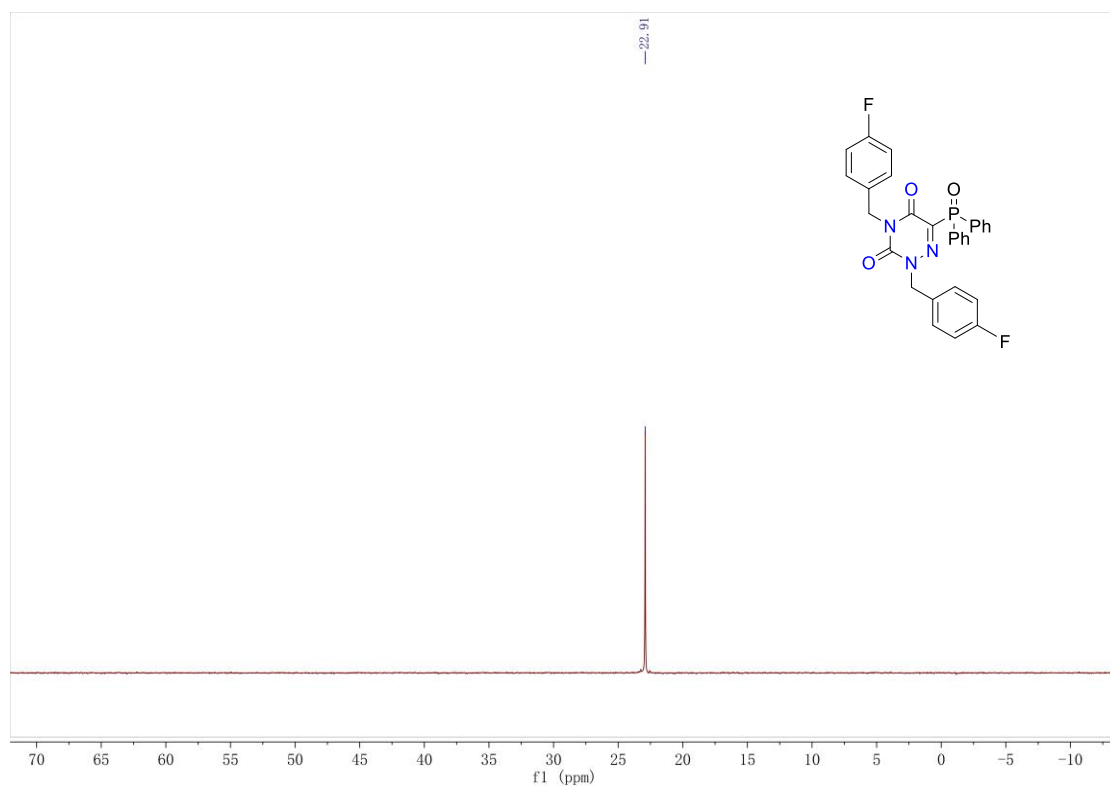

3d-<sup>13</sup>C

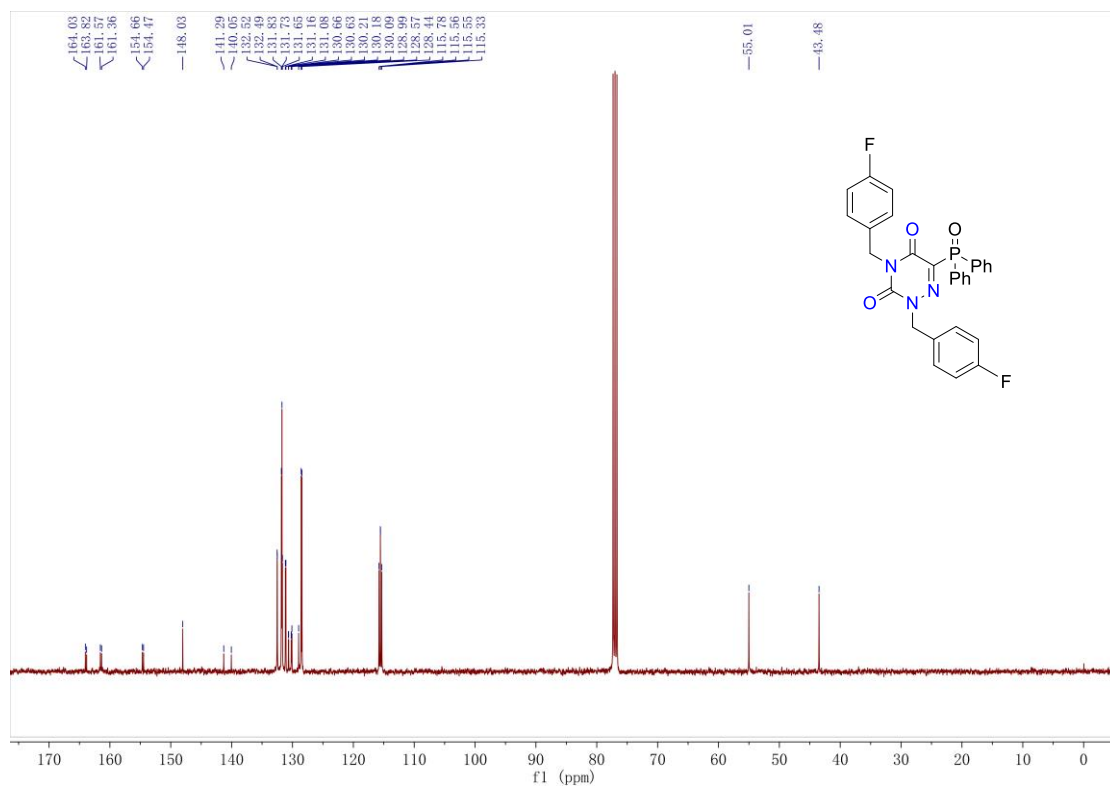

**3e-<sup>1</sup>H**

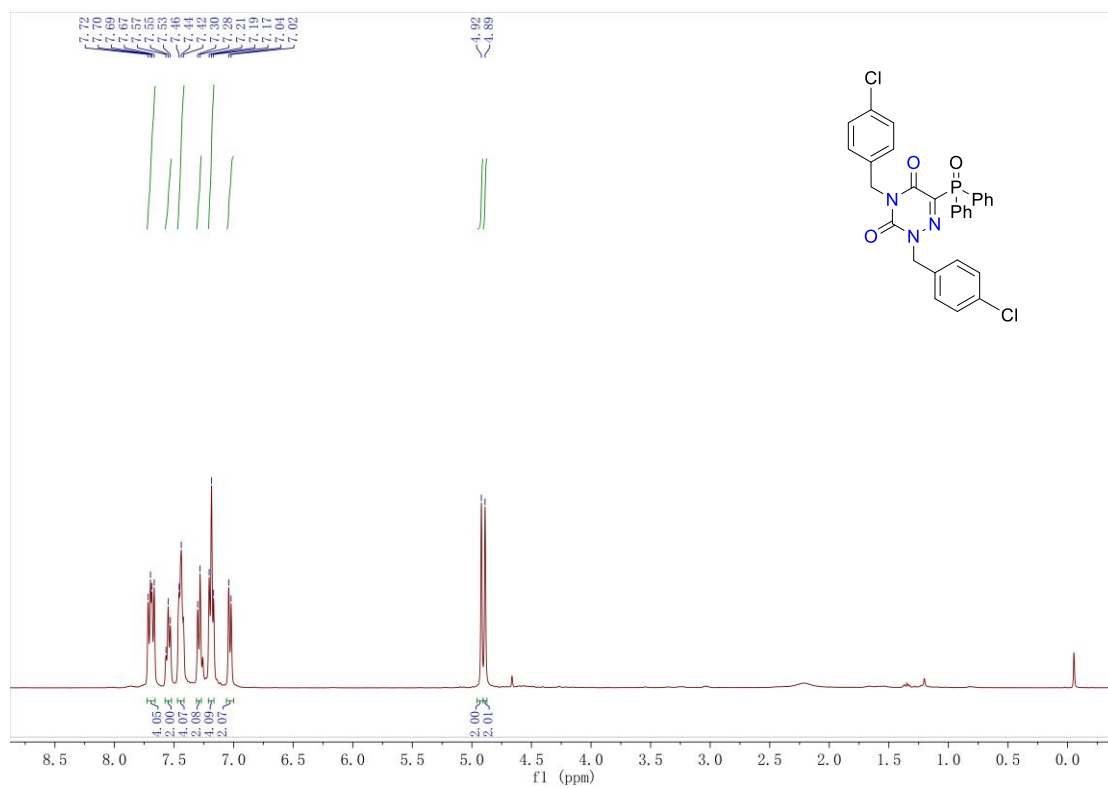

**3e-<sup>31</sup>P**

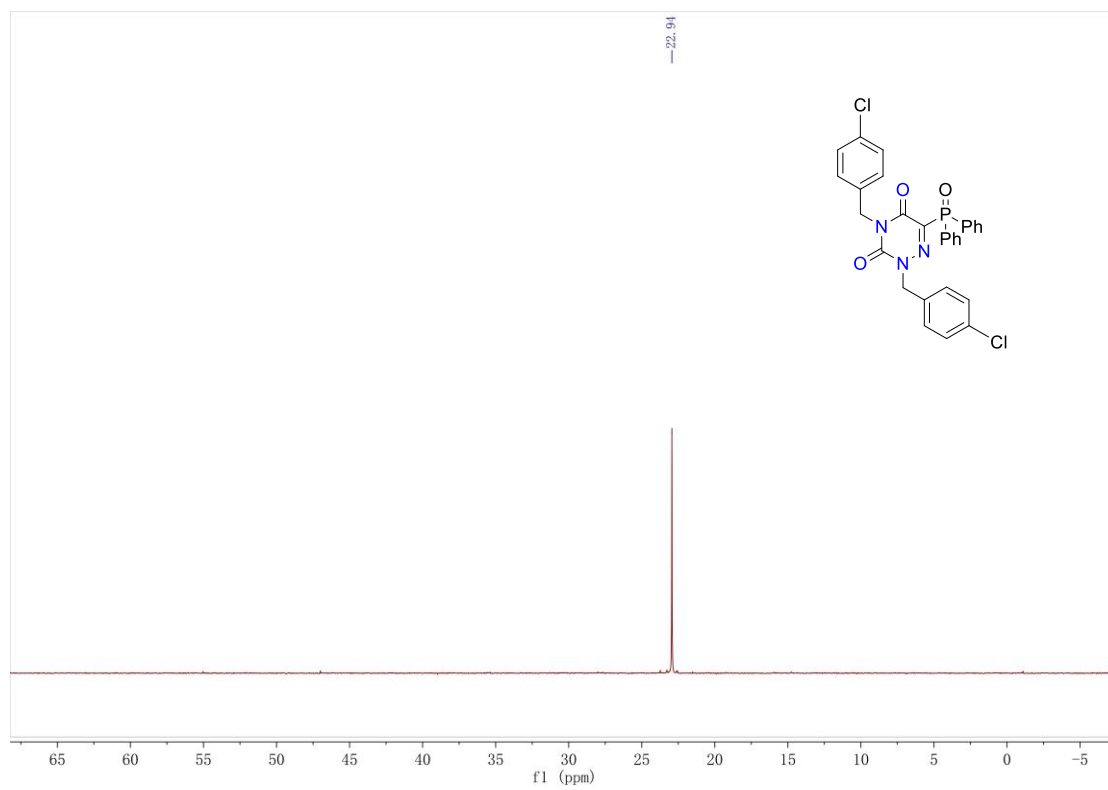



3e-<sup>13</sup>C

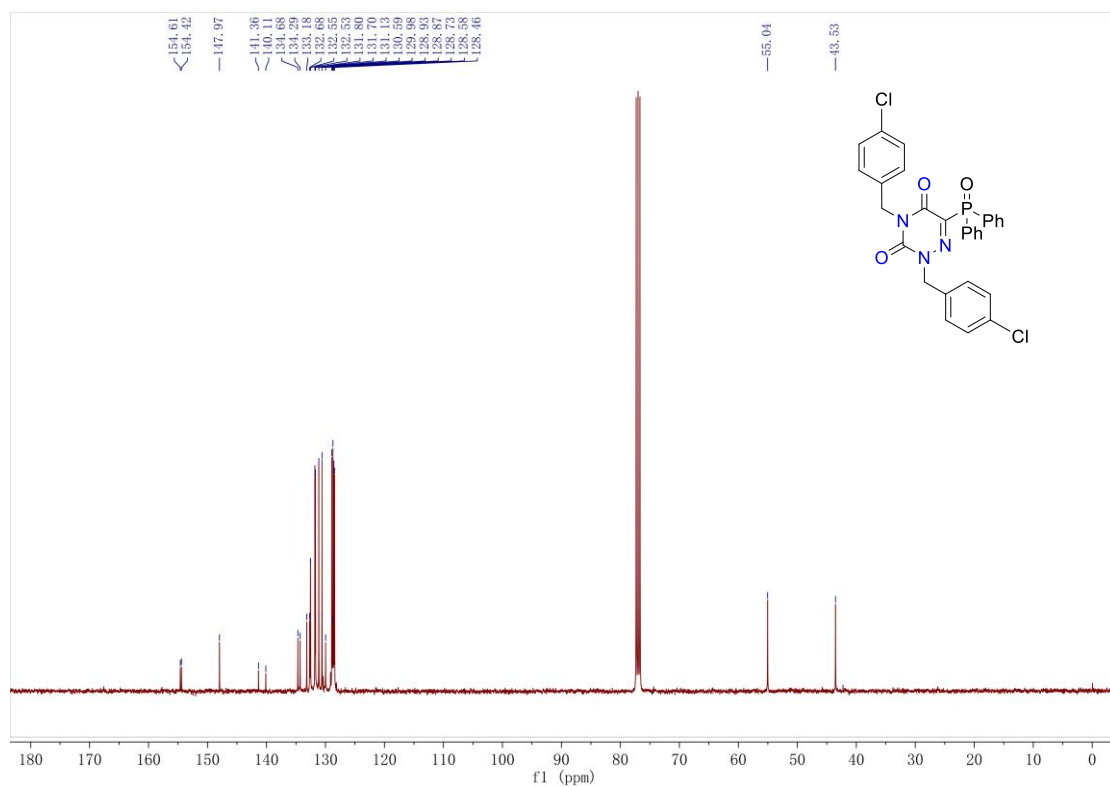

3f-<sup>1</sup>H

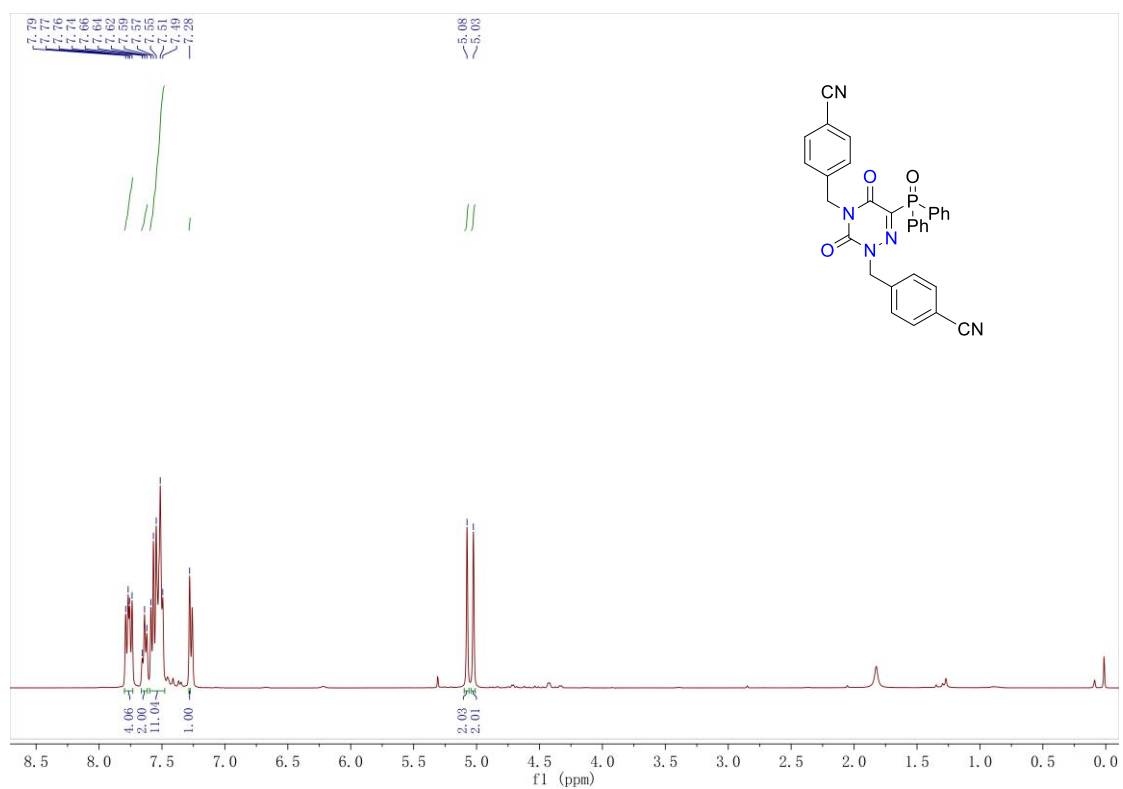

3f-<sup>31</sup>P

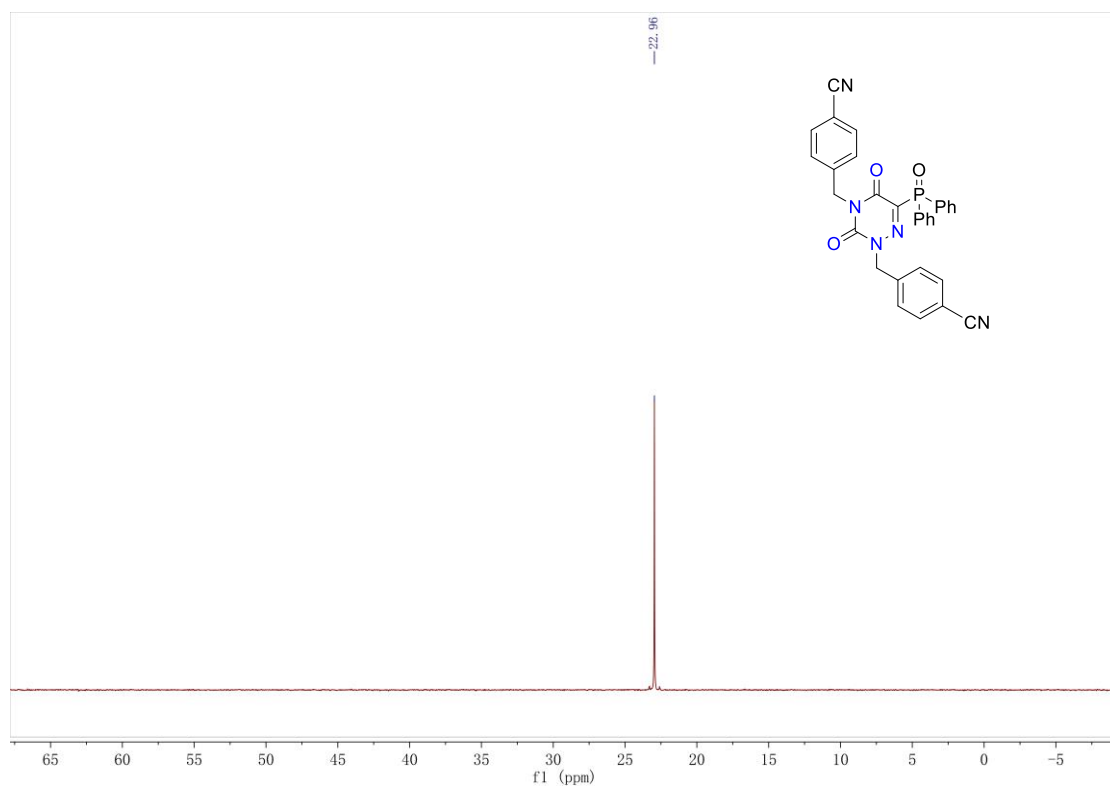

3f-<sup>13</sup>C

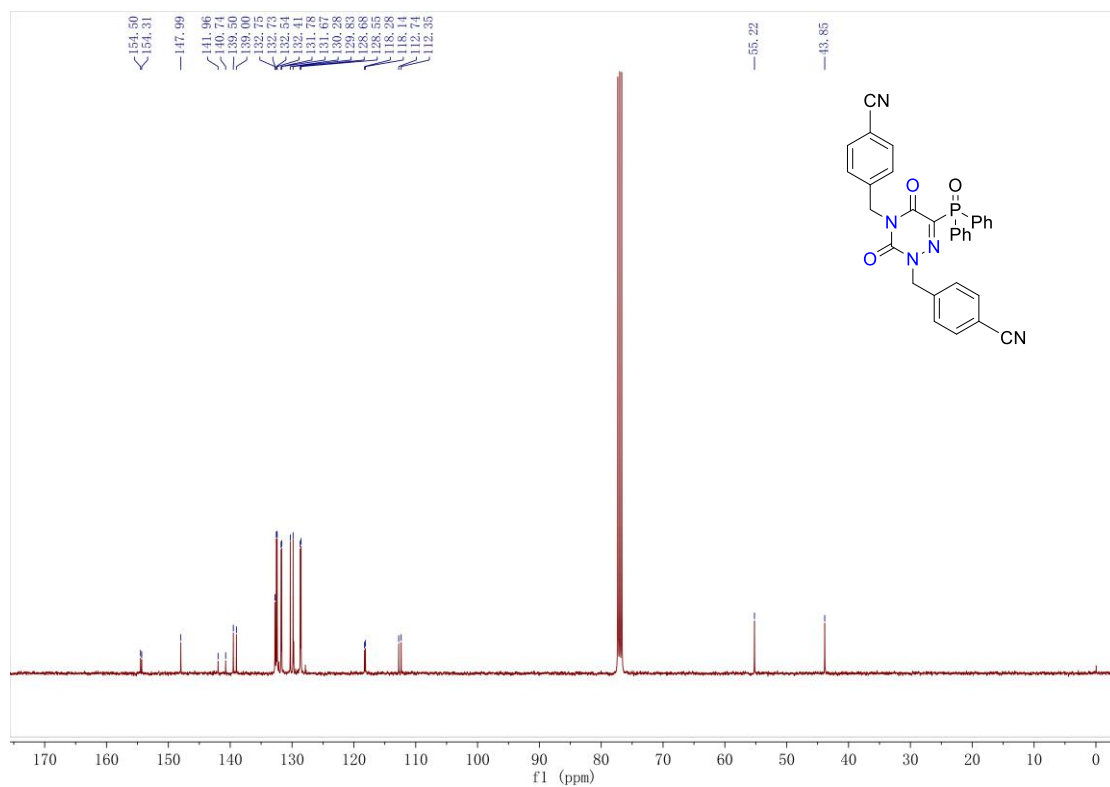

3g-<sup>1</sup>H

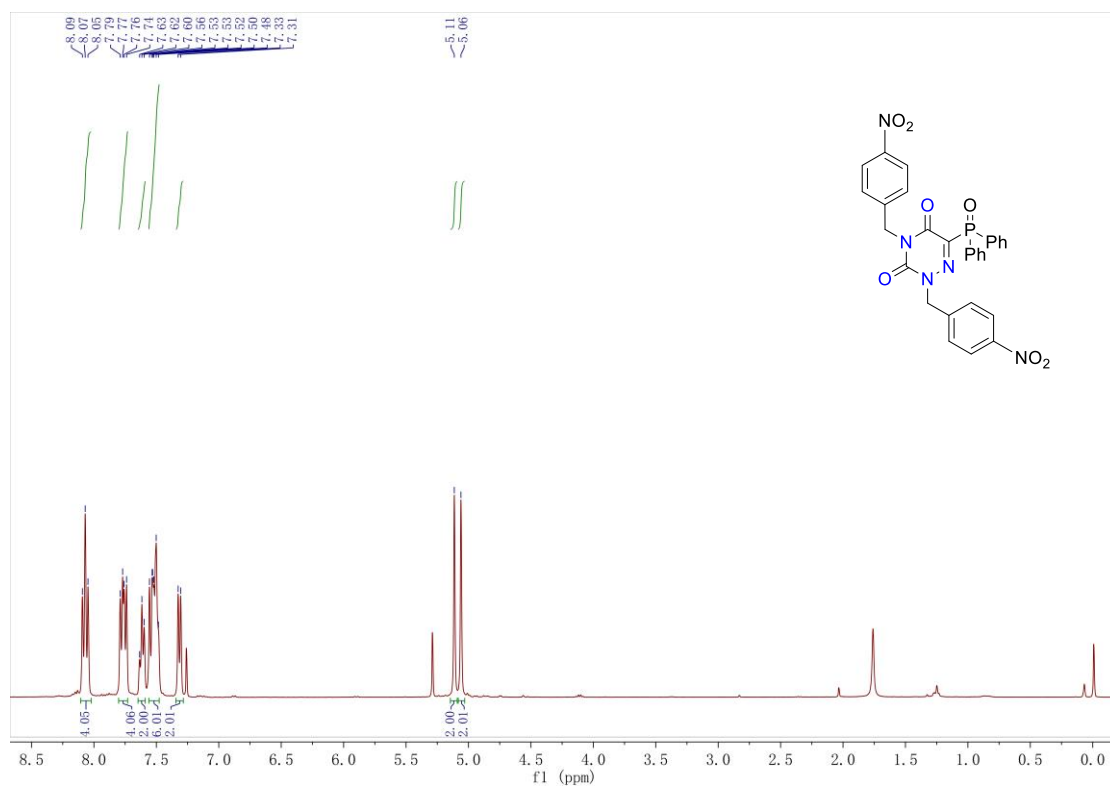

3g-<sup>31</sup>P

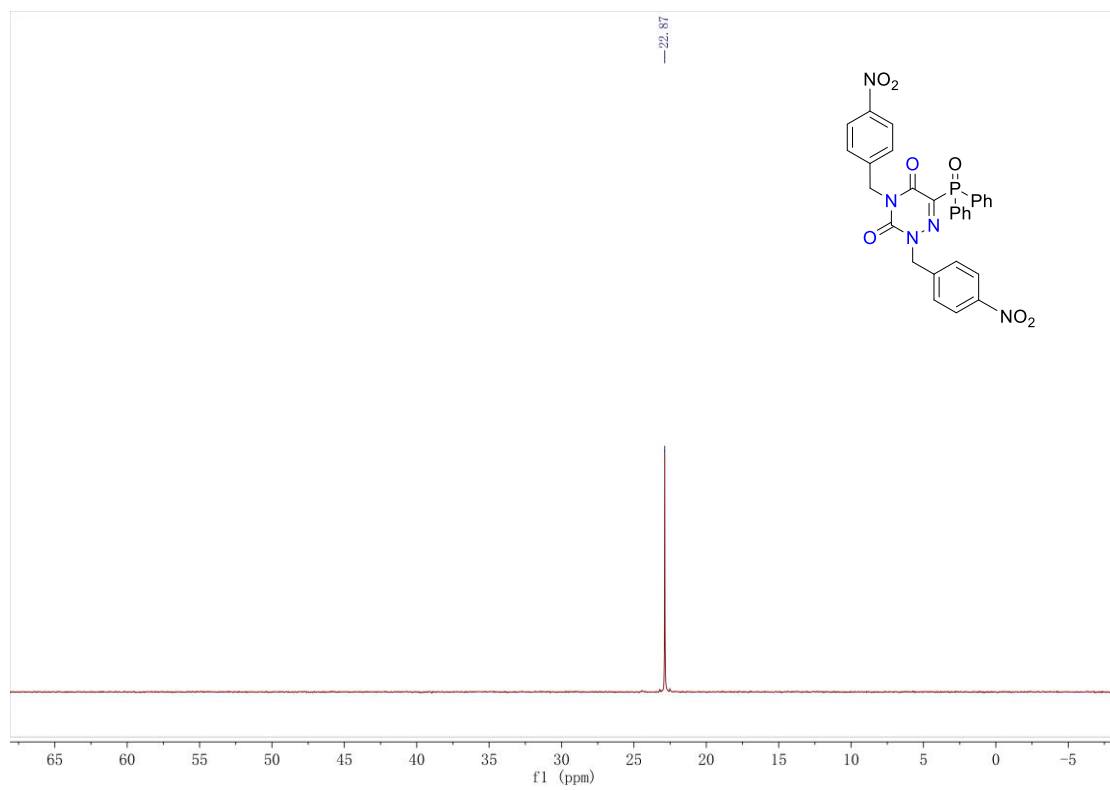

3g-<sup>13</sup>C

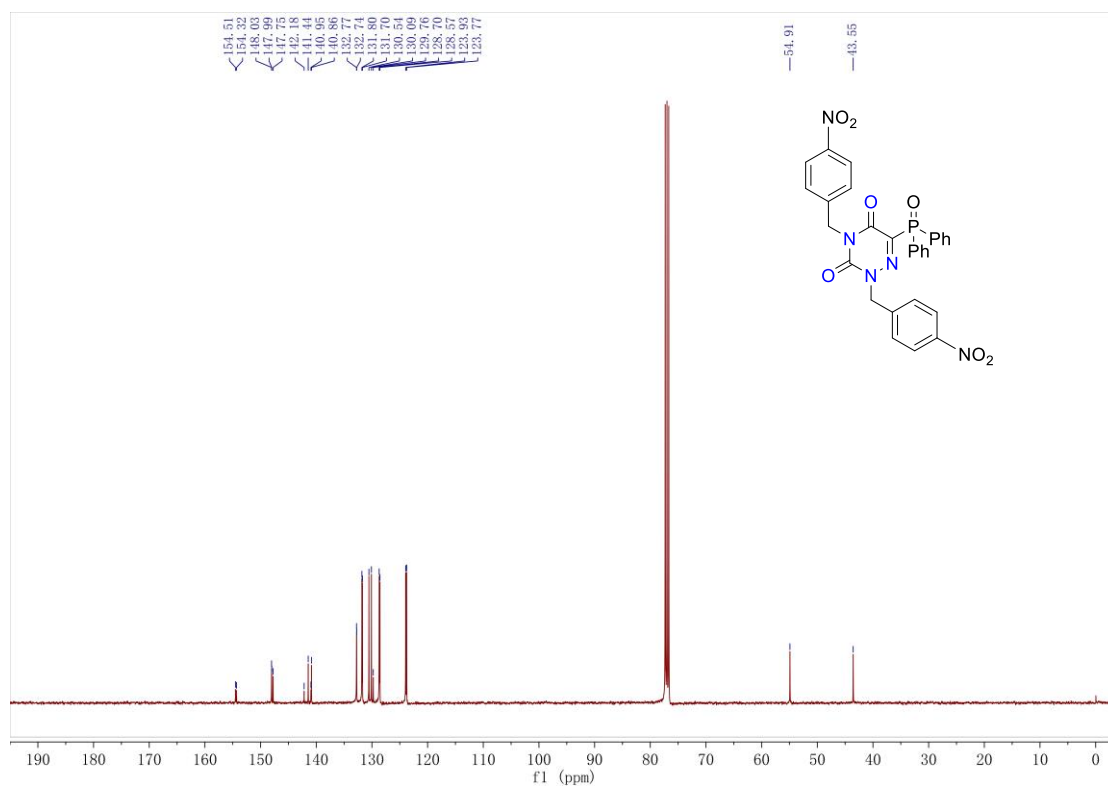

3h-<sup>1</sup>H

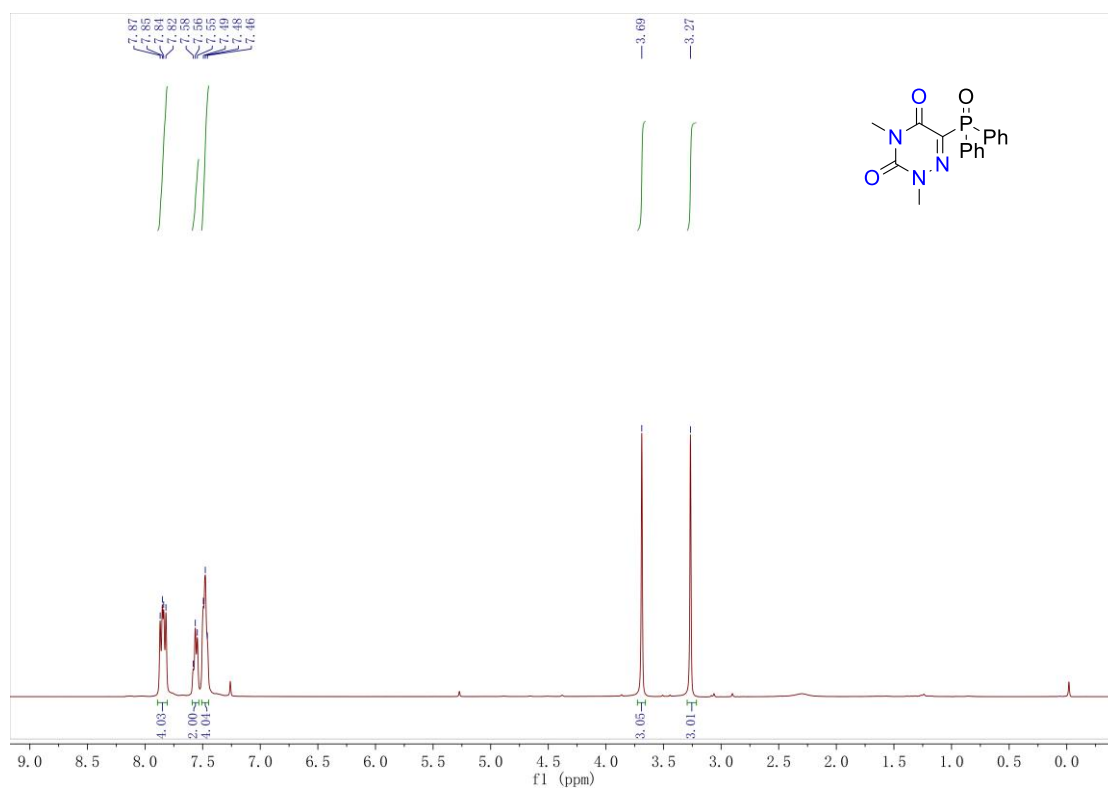

3h-<sup>31</sup>P

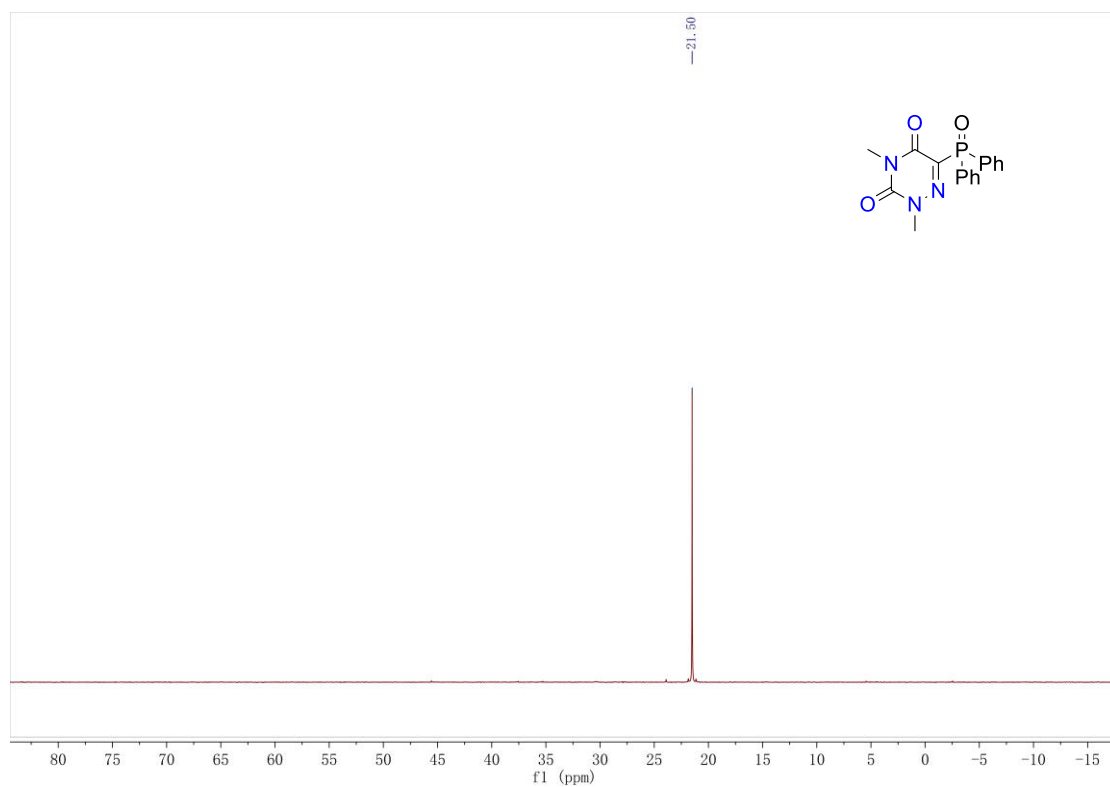

3h-<sup>13</sup>C

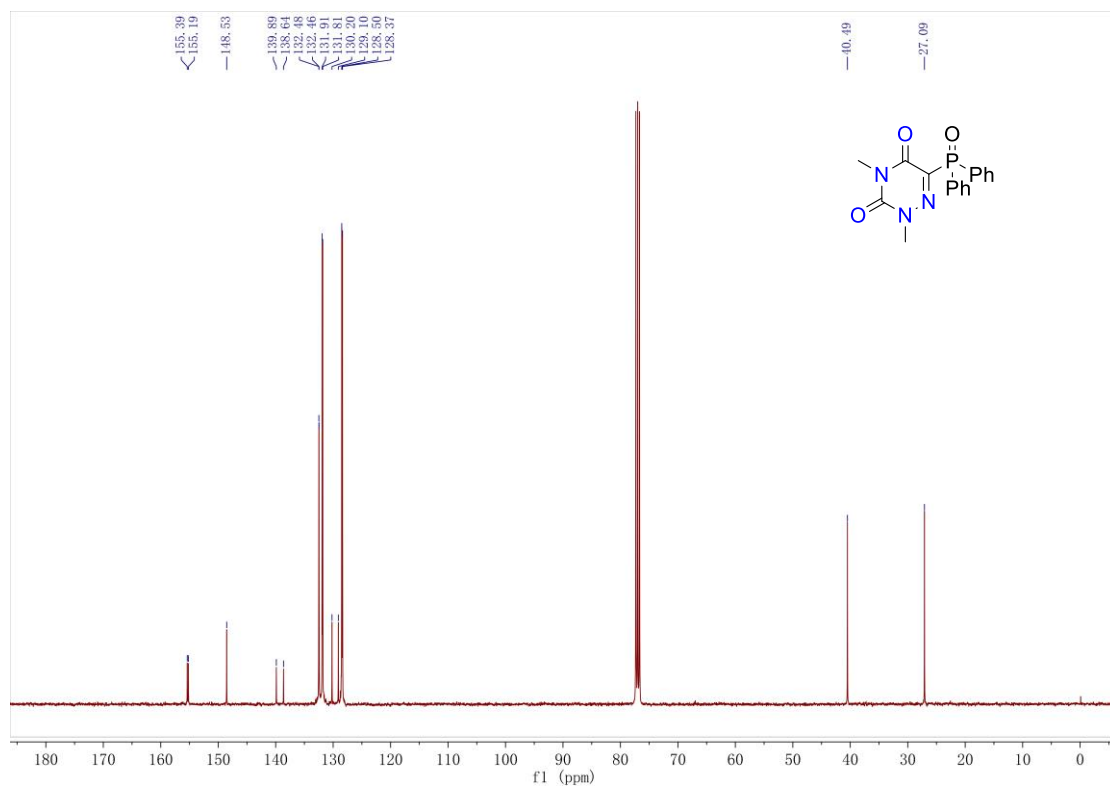

**3i-<sup>1</sup>H**

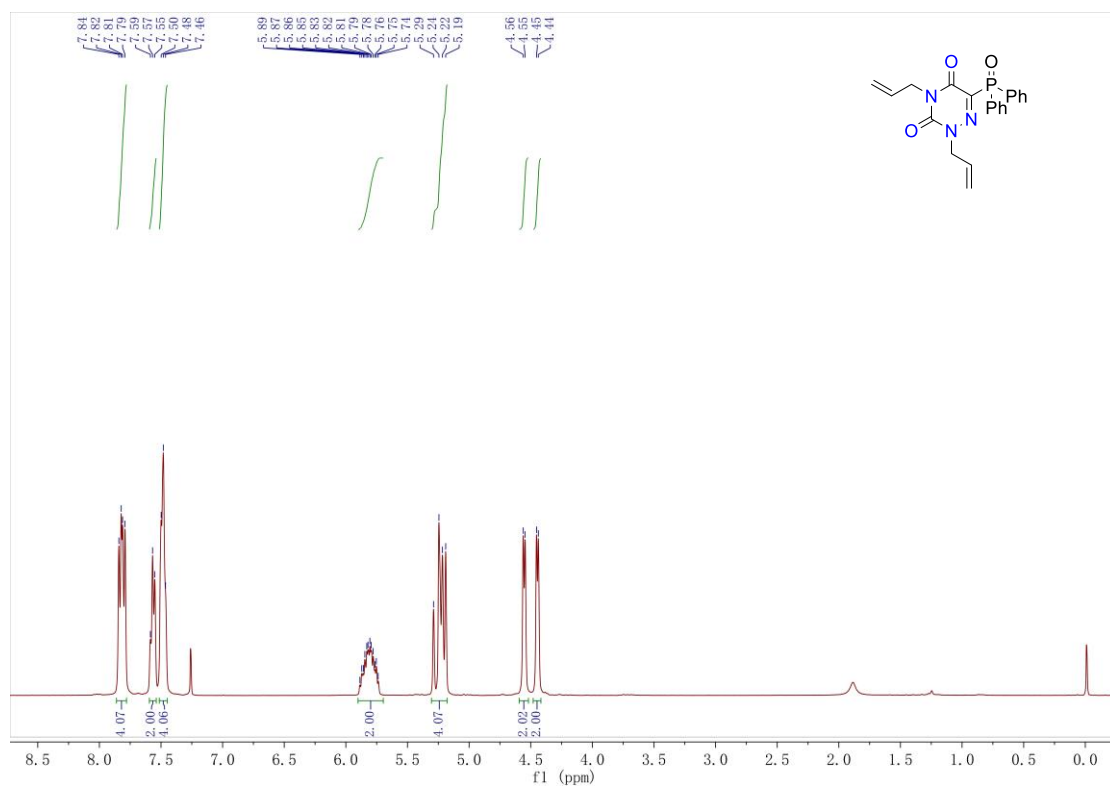

**3i-<sup>31</sup>P**

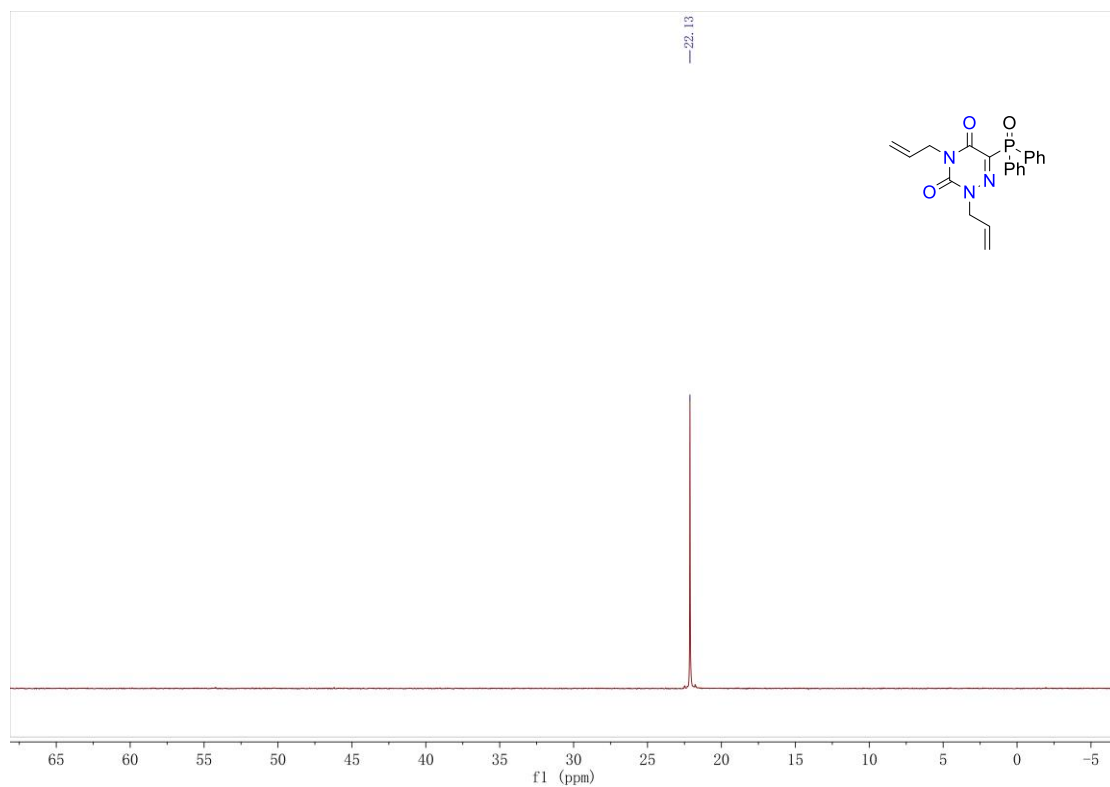

**3i-<sup>13</sup>C**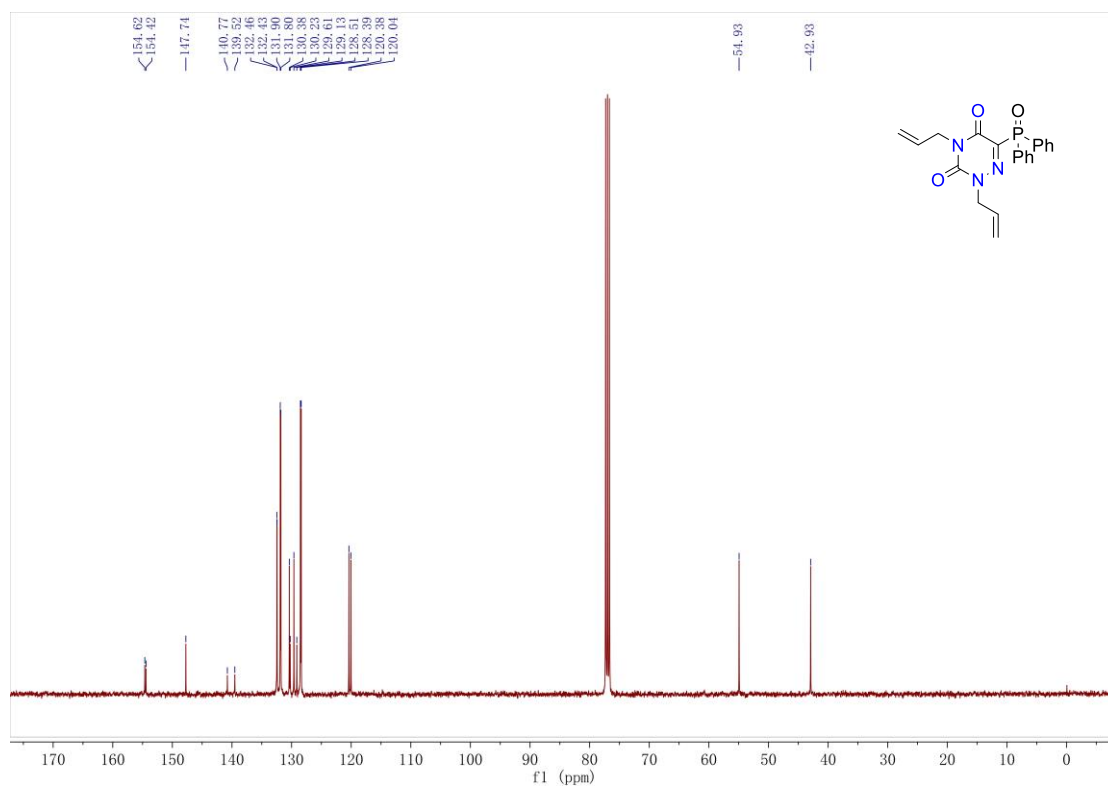**3j-<sup>1</sup>H**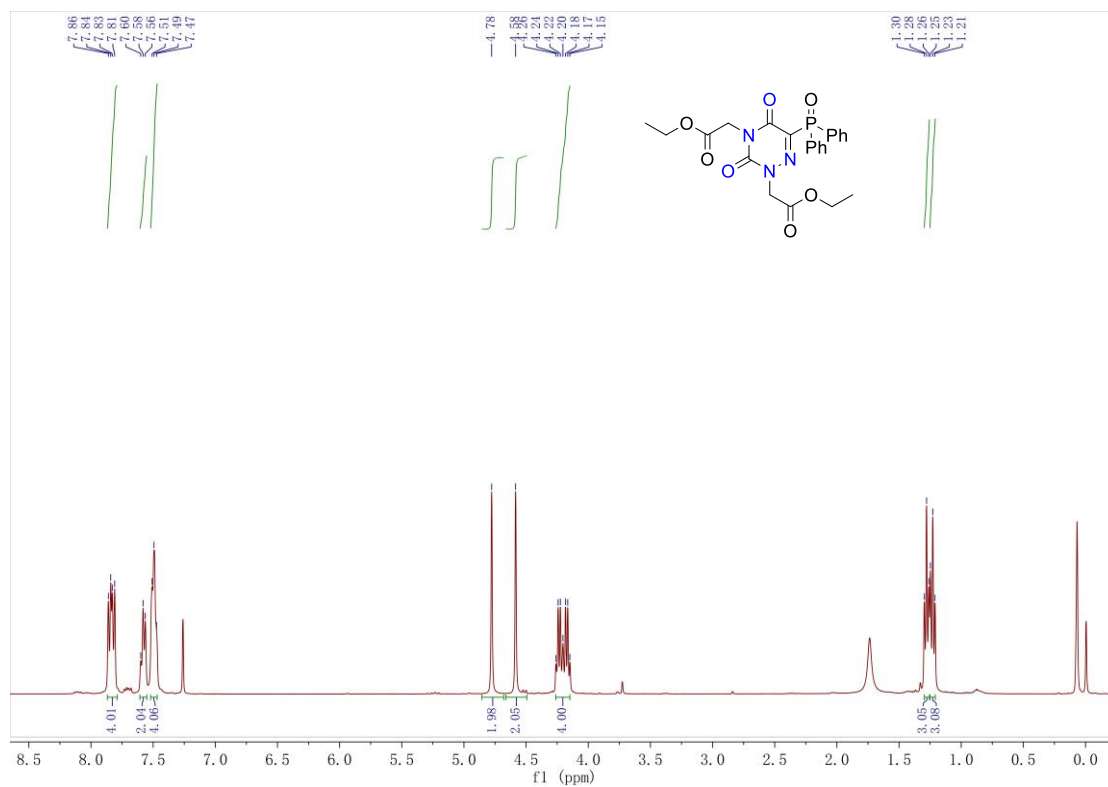

3j-<sup>31</sup>P

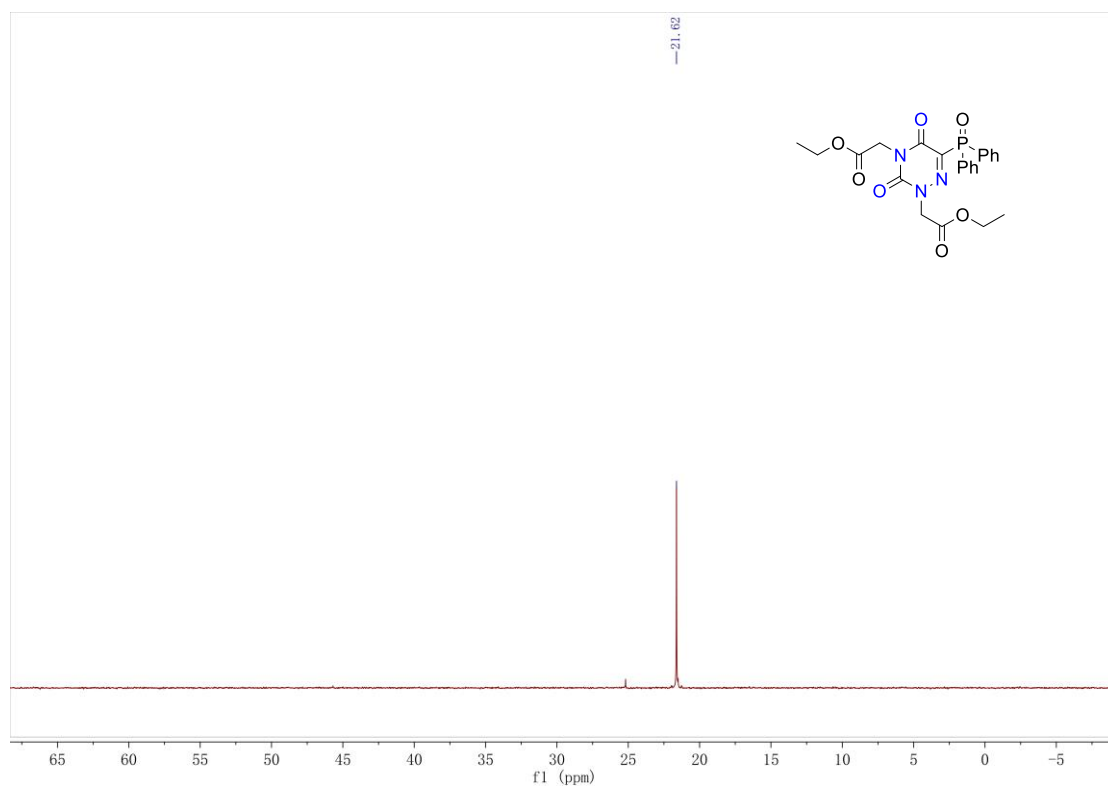

3j-<sup>13</sup>C

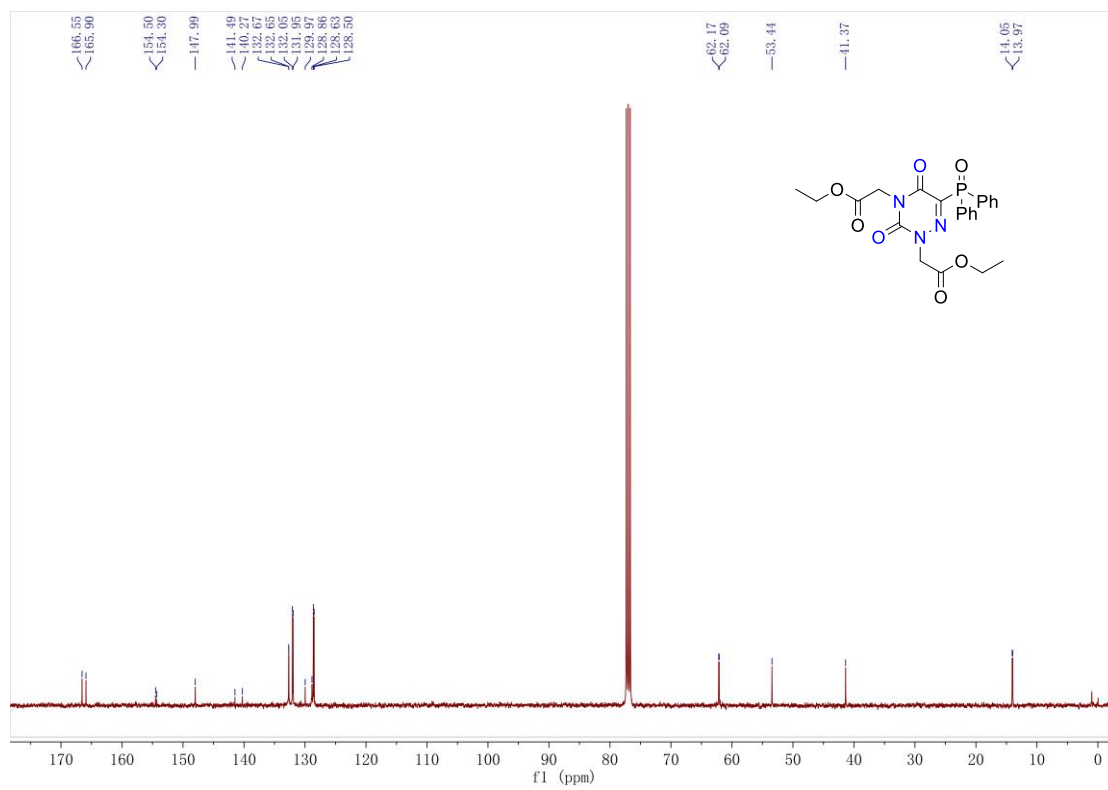



**3k-<sup>1</sup>H**

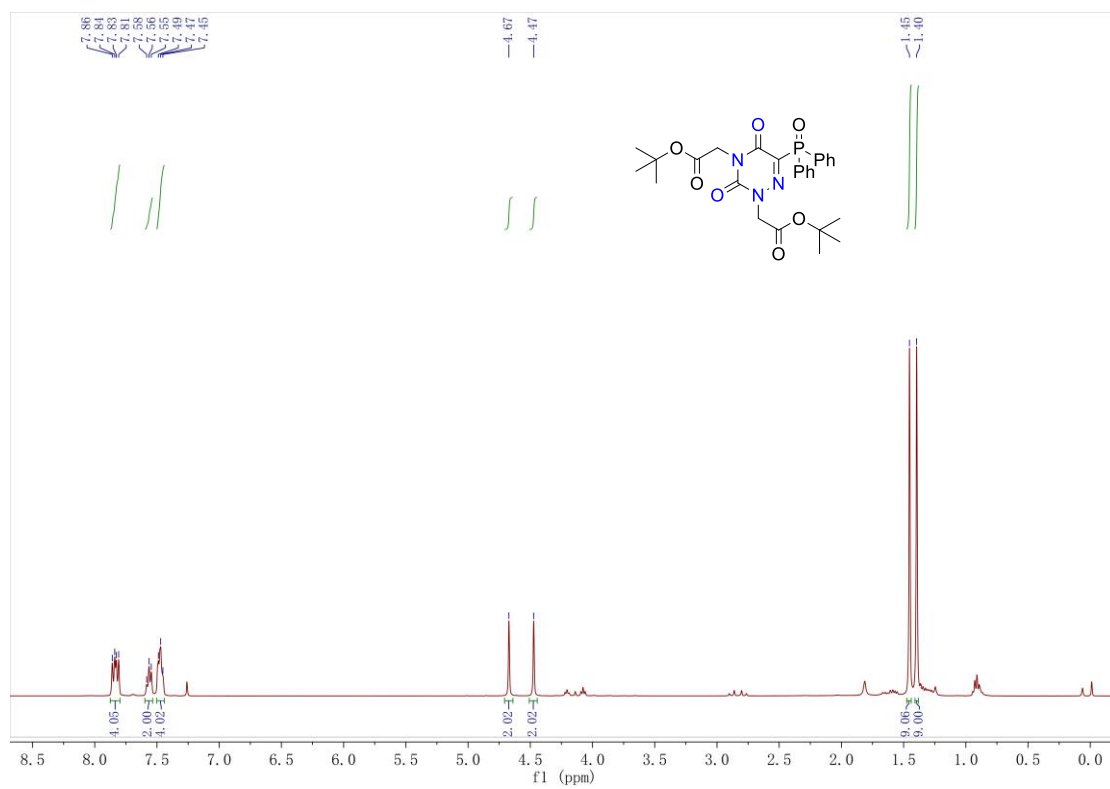

**3k-<sup>31</sup>P**

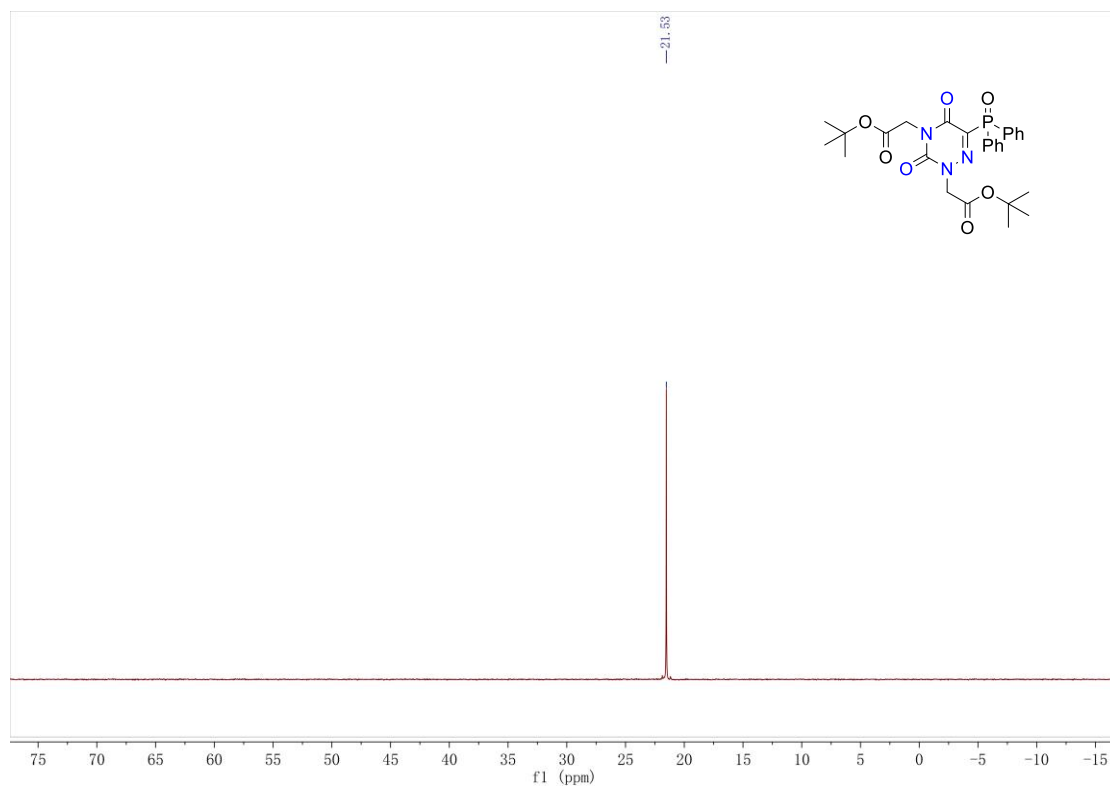

### 3k-<sup>13</sup>C

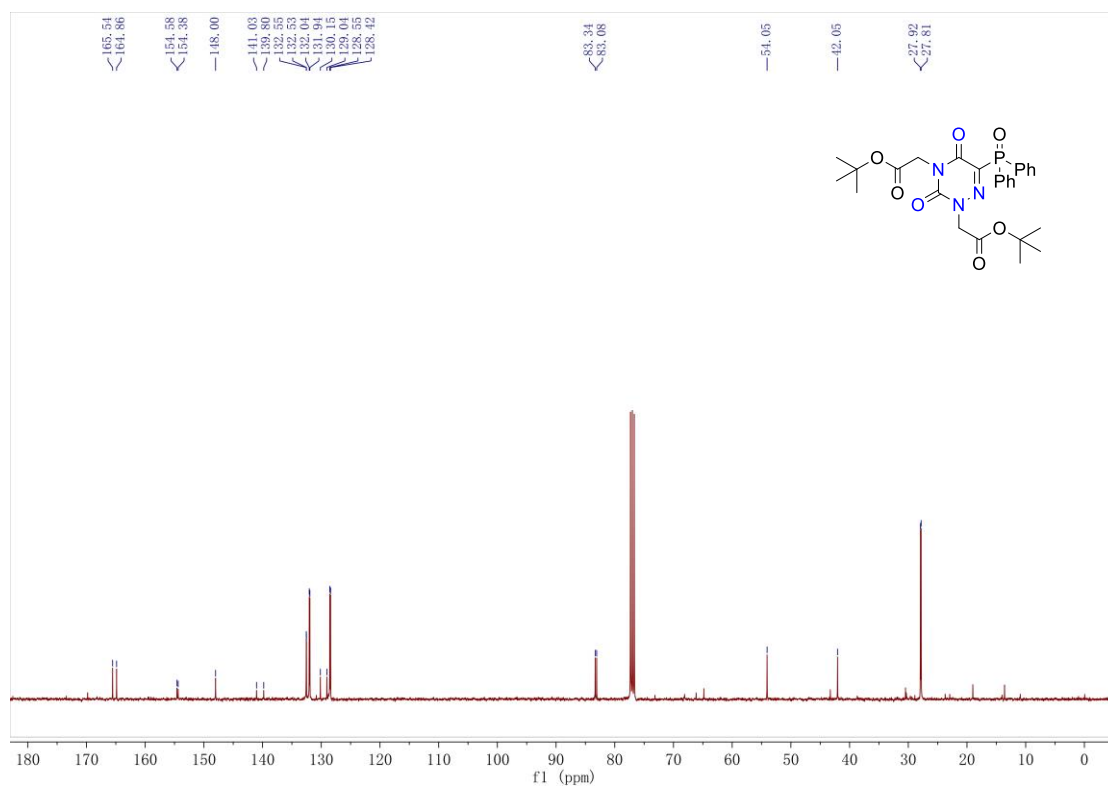

### 3l-<sup>1</sup>H

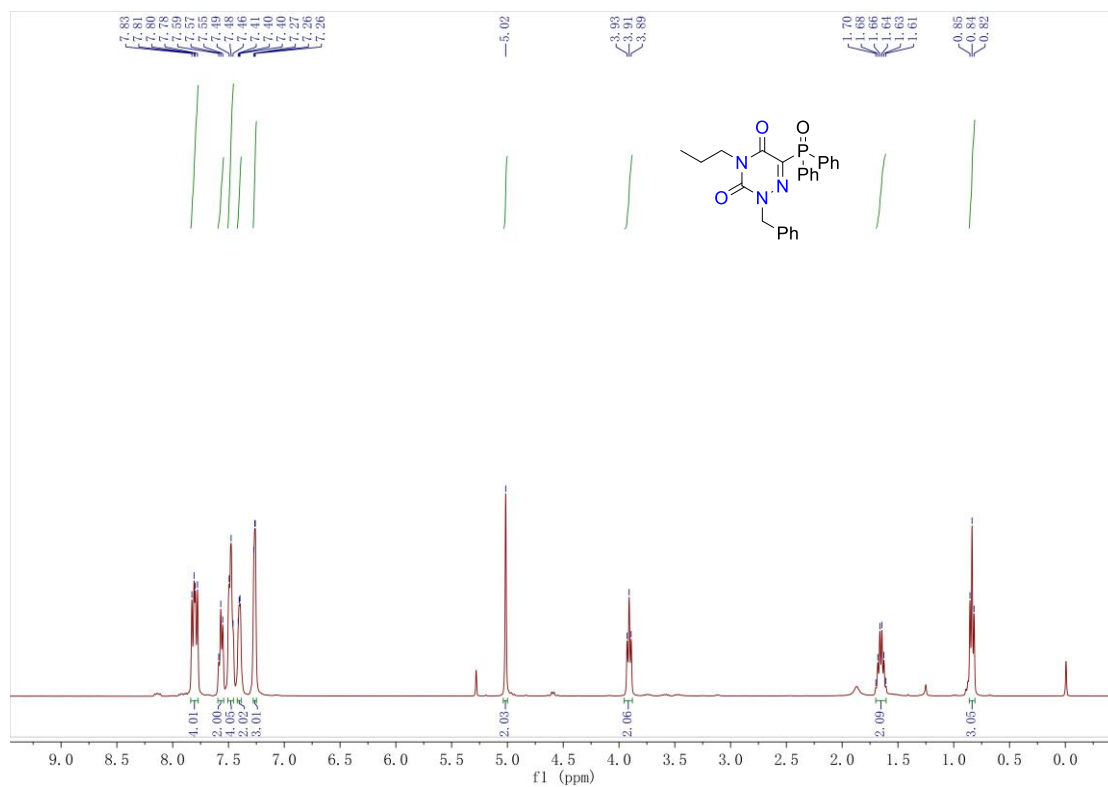

**31-<sup>31</sup>P**

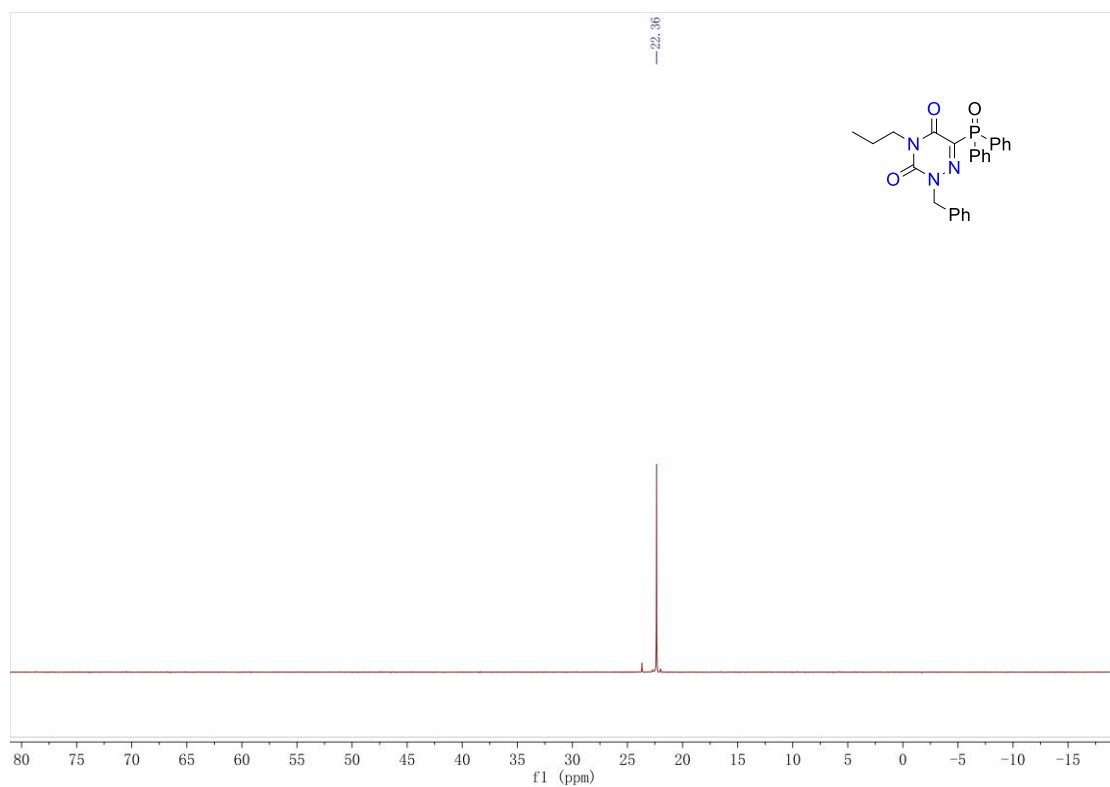

**31-<sup>13</sup>C**

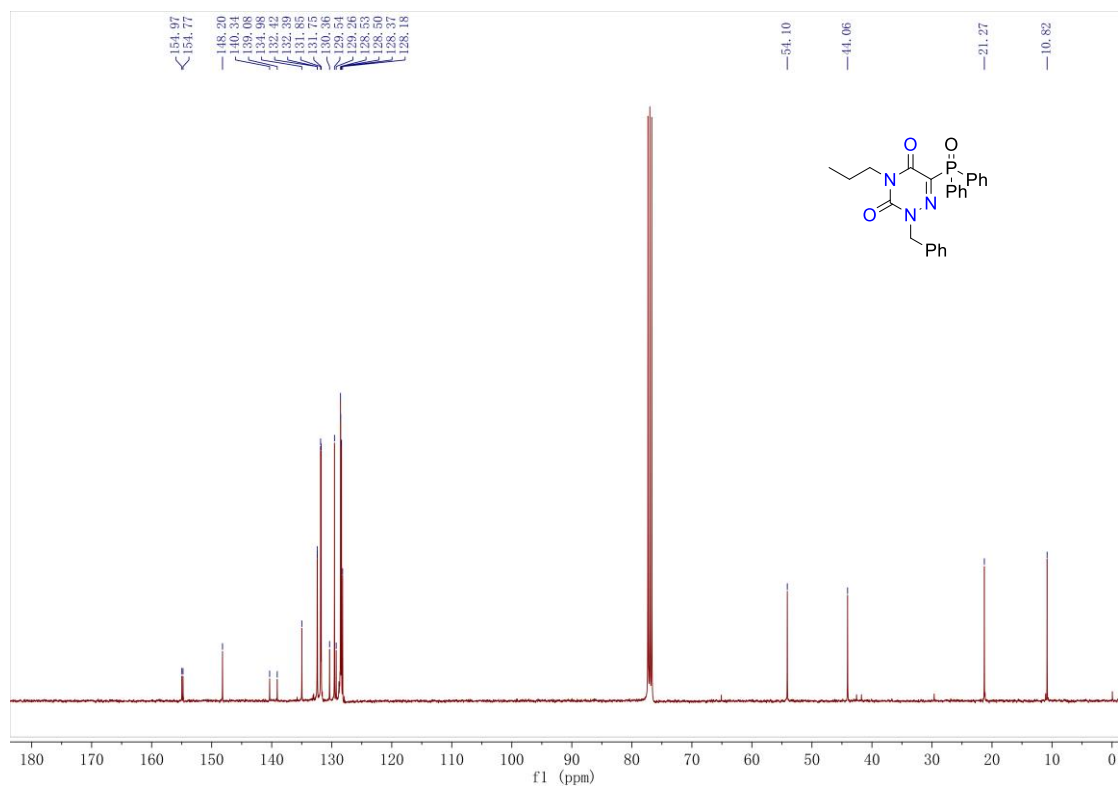

3m-<sup>1</sup>H

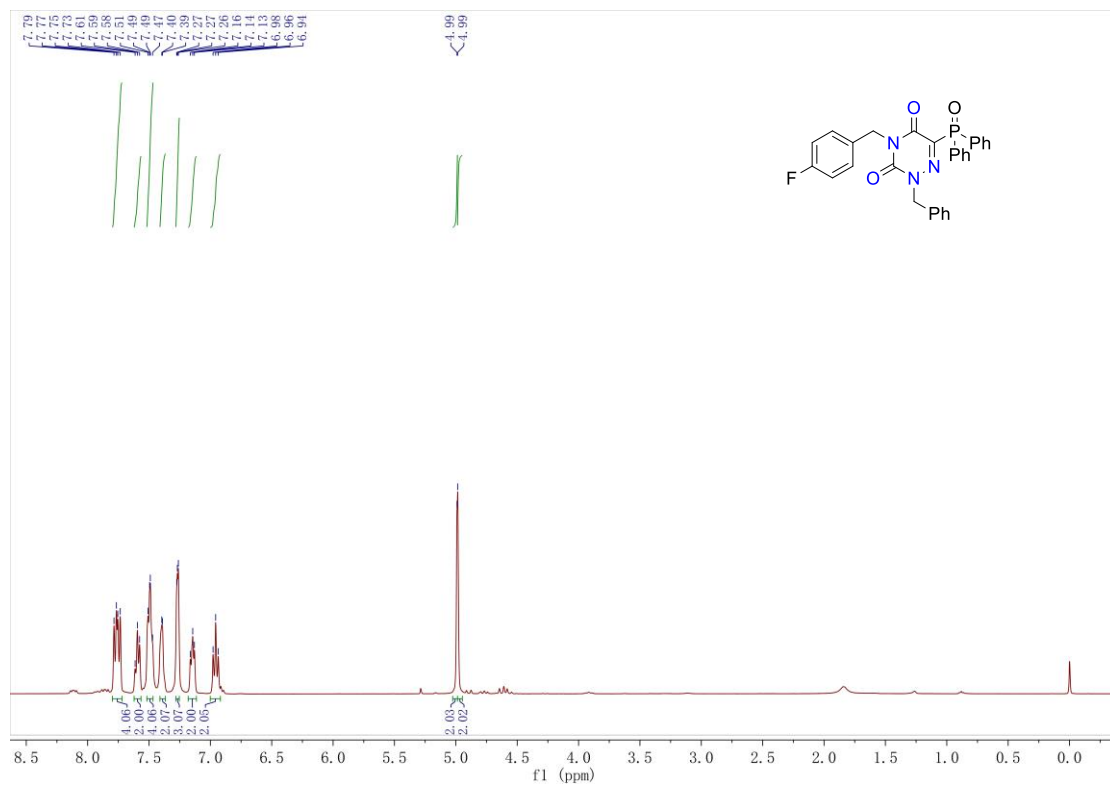

3m-<sup>31</sup>P

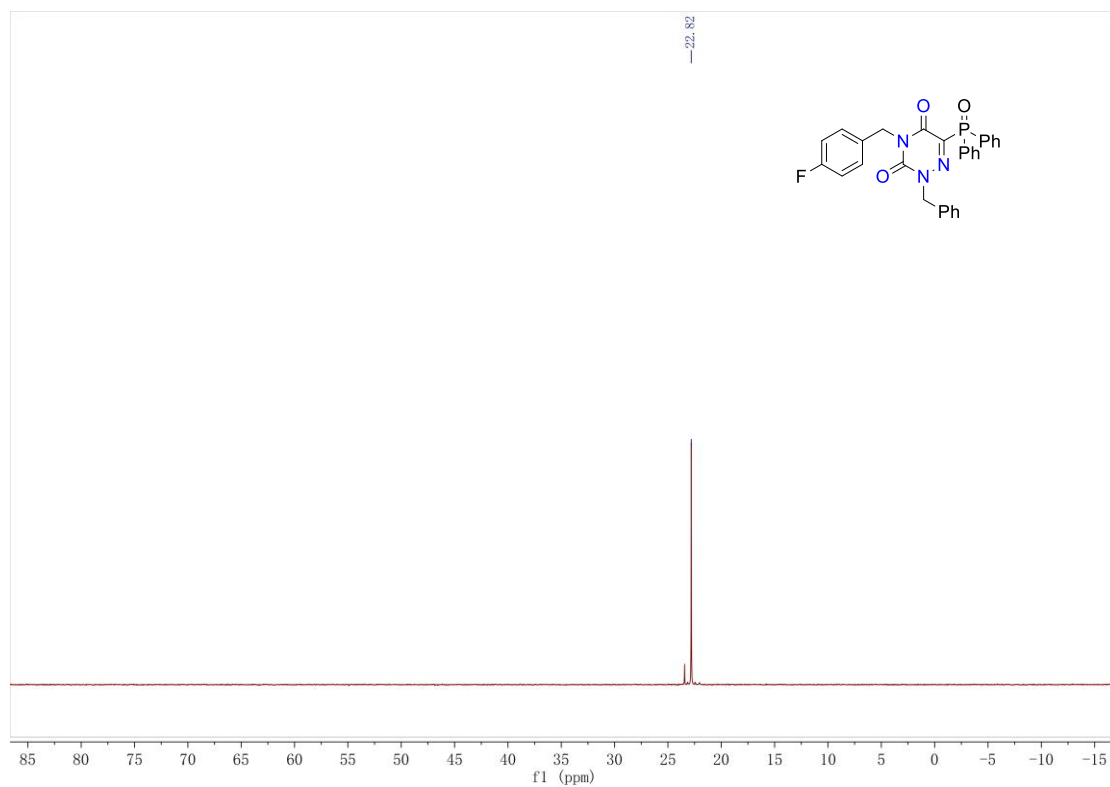

### 3m-<sup>13</sup>C

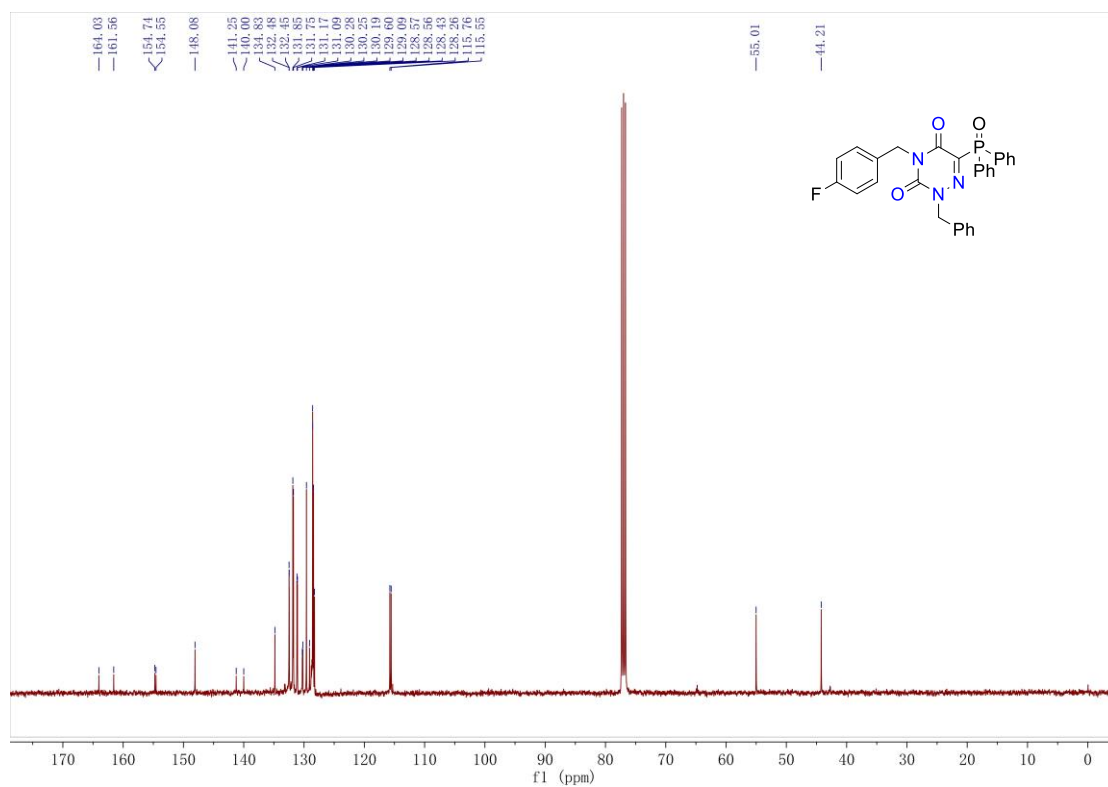

### 3n-<sup>1</sup>H

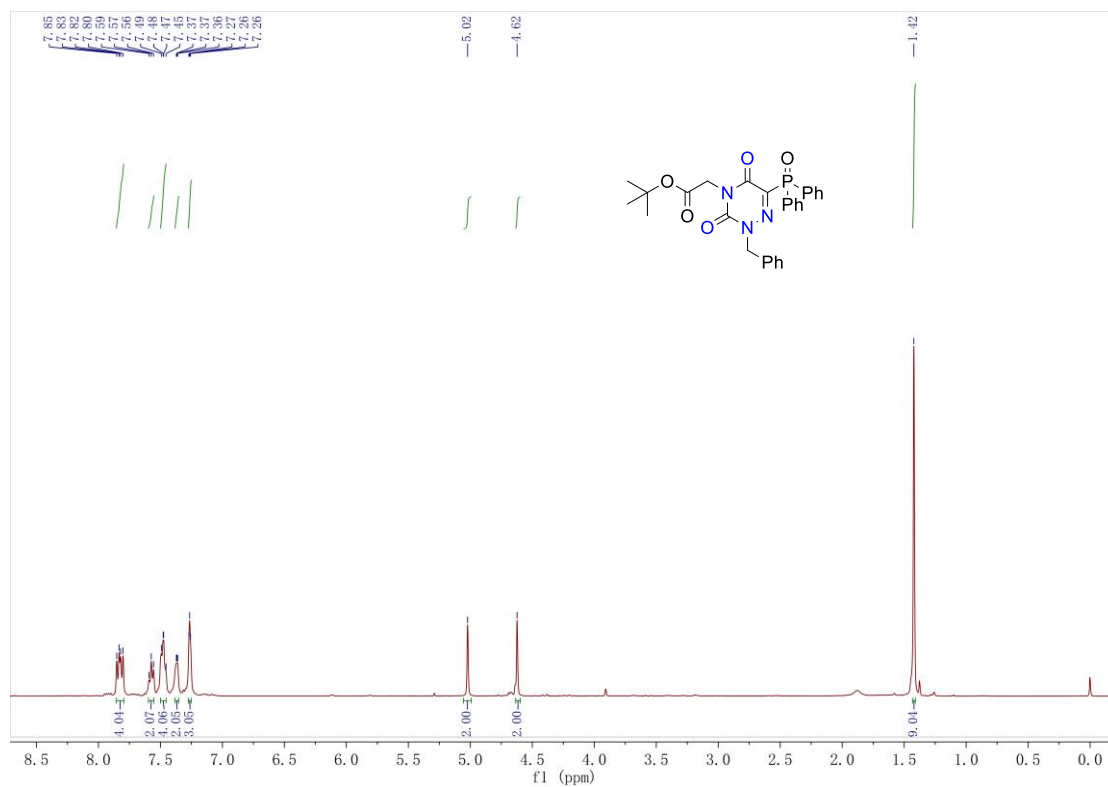

**3n-<sup>31</sup>P**

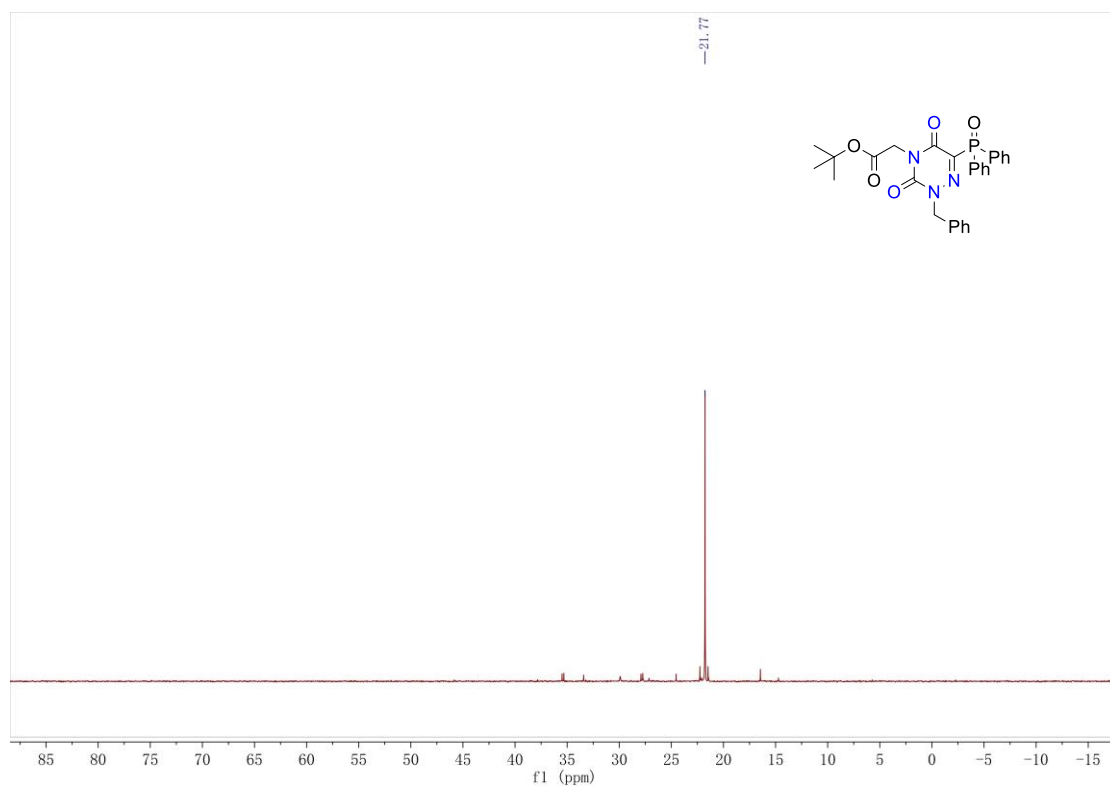

**3n-<sup>13</sup>C**

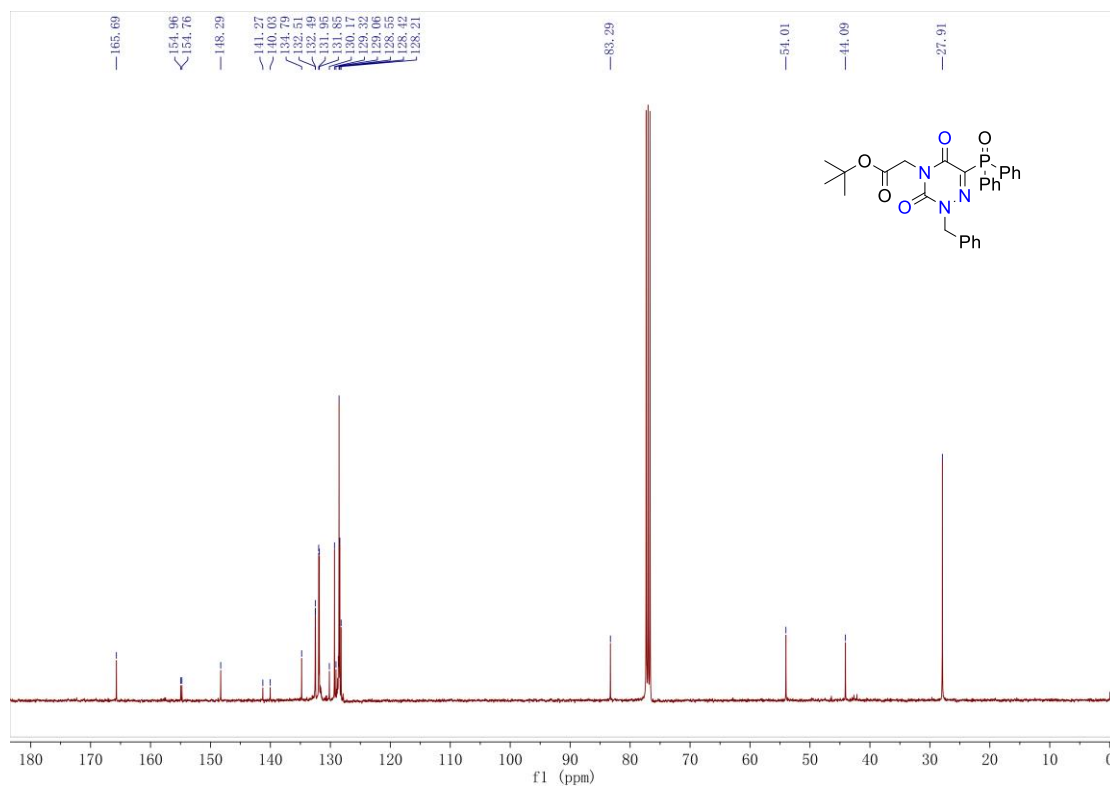

**30-<sup>1</sup>H**

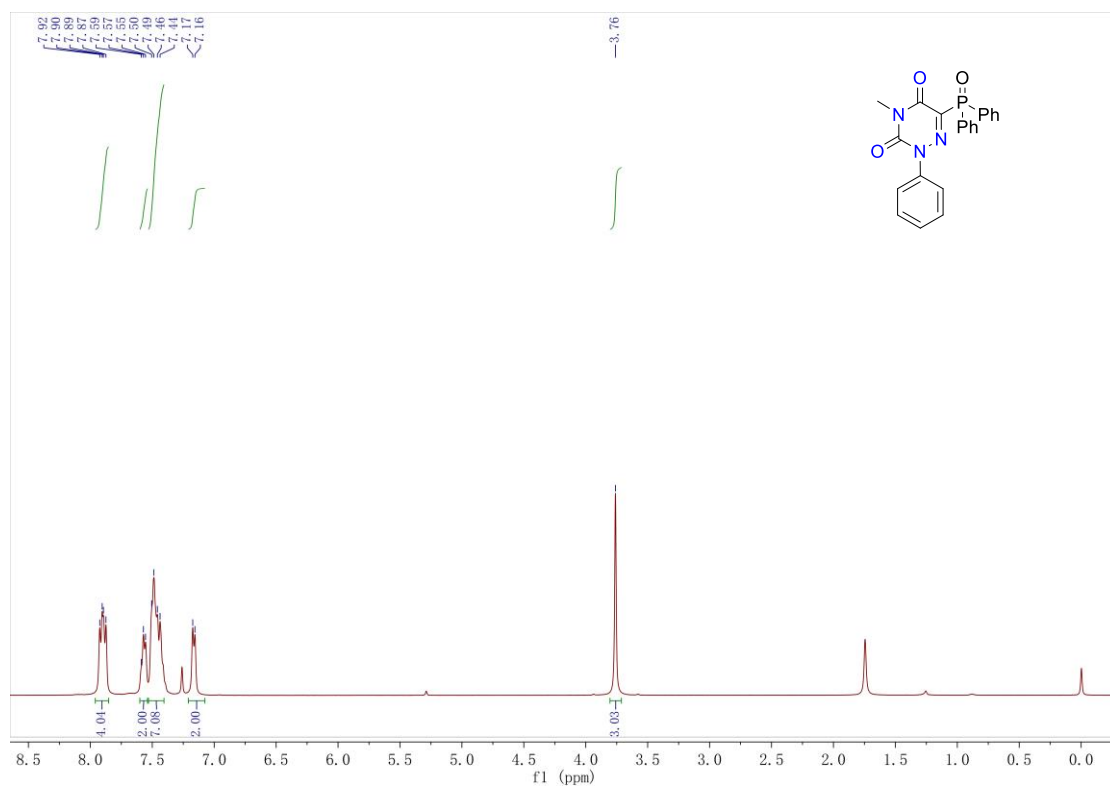

**30-<sup>31</sup>P**

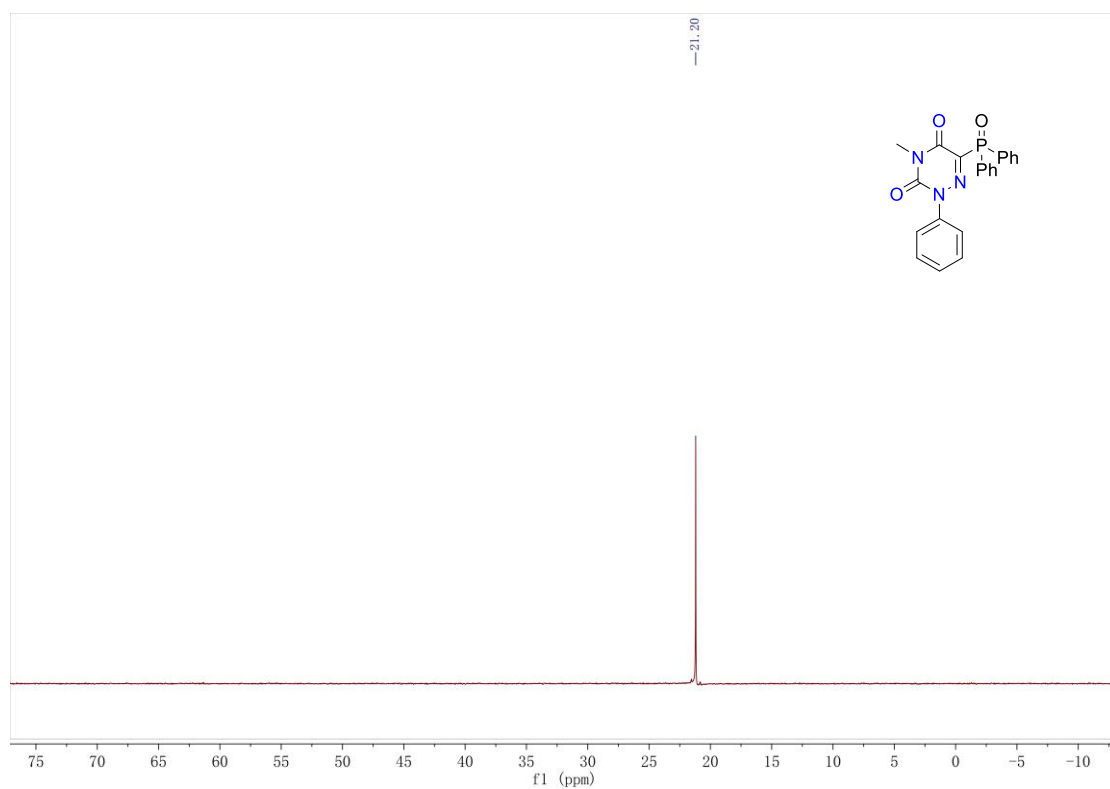

3o- $^{13}\text{C}$

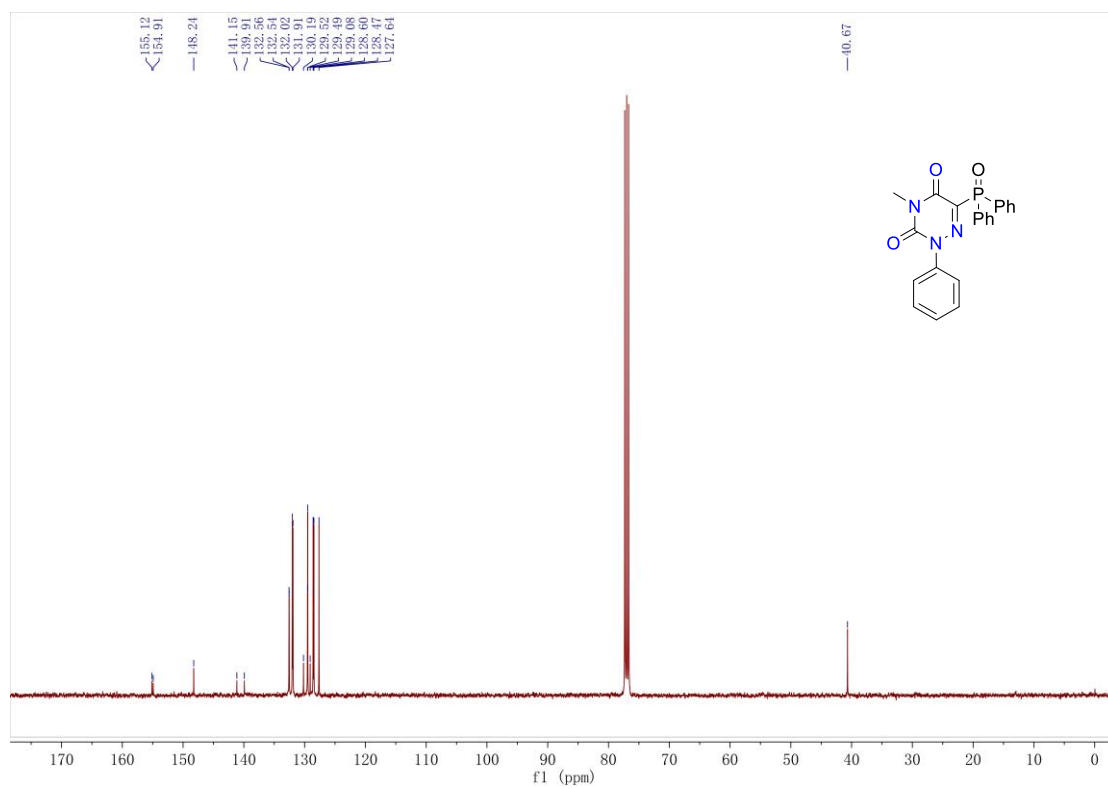

3p- $^1\text{H}$

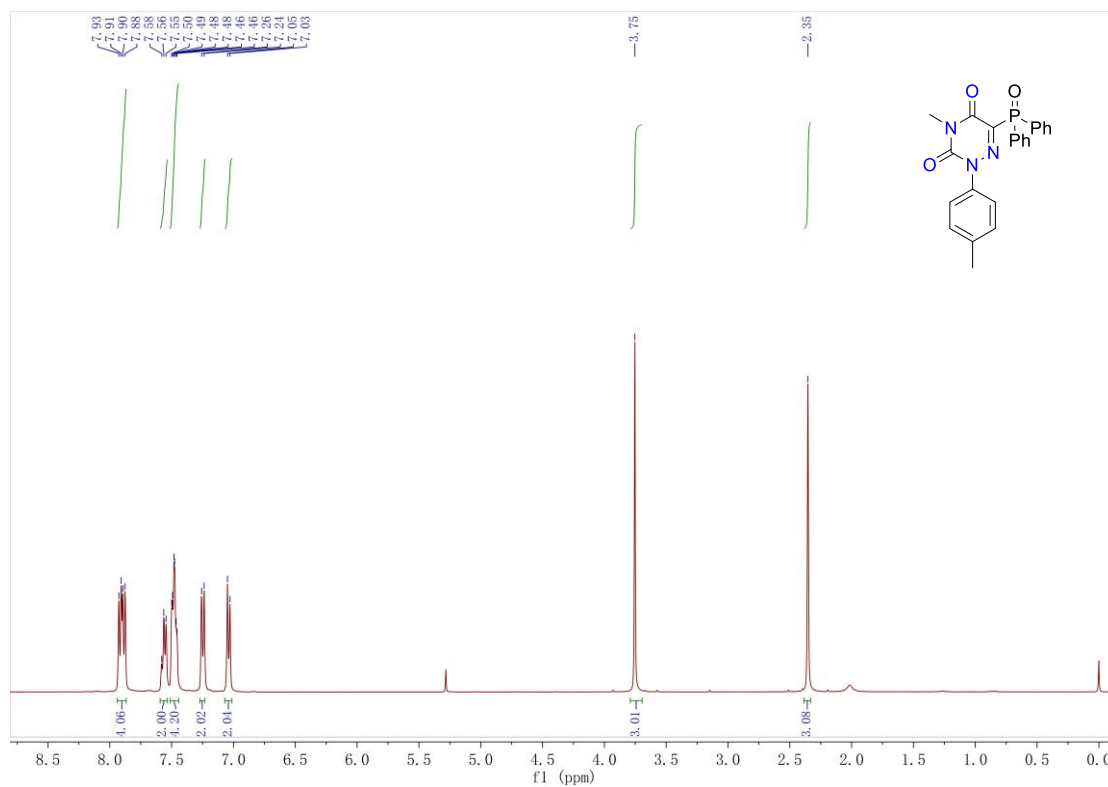



**3p-<sup>31</sup>P**

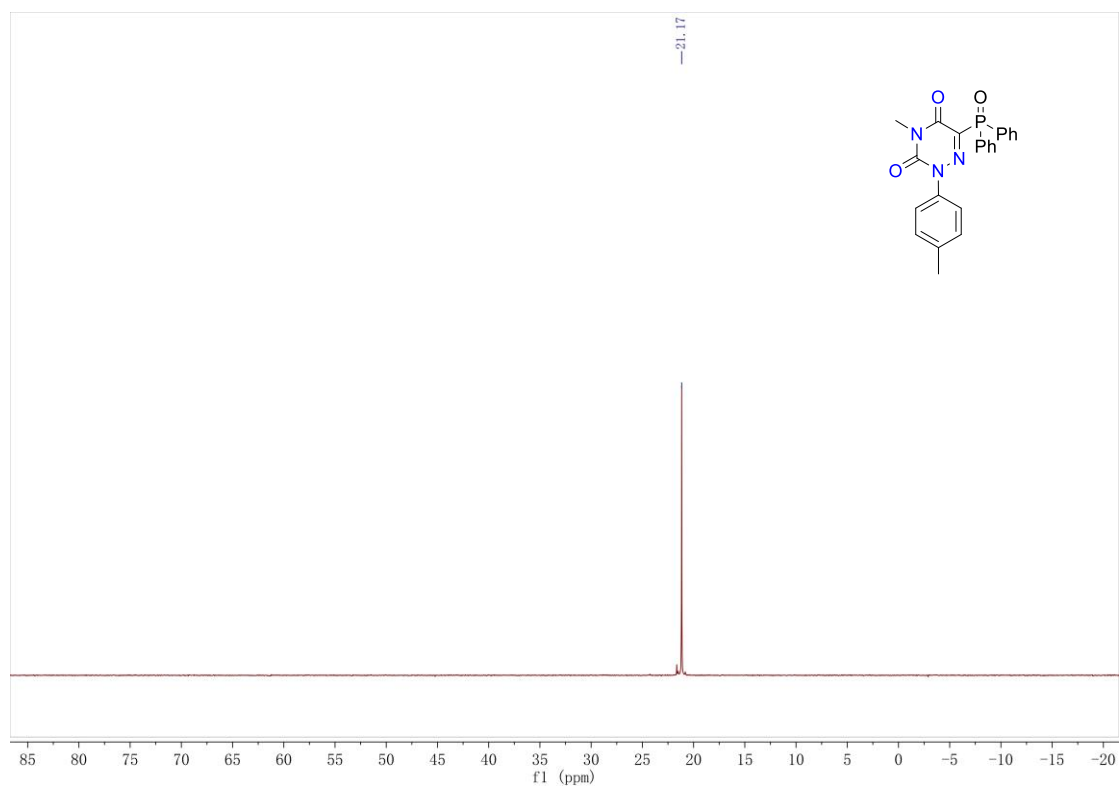

**3p-<sup>13</sup>C**

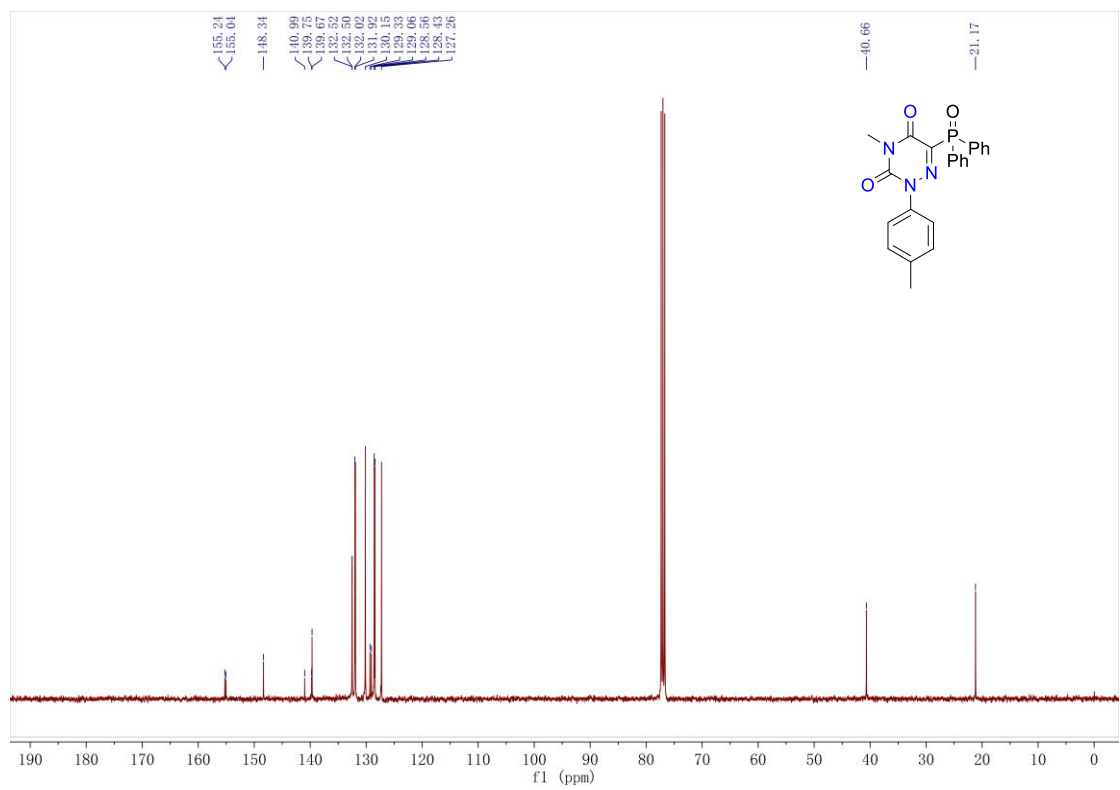

**3q-<sup>1</sup>H**

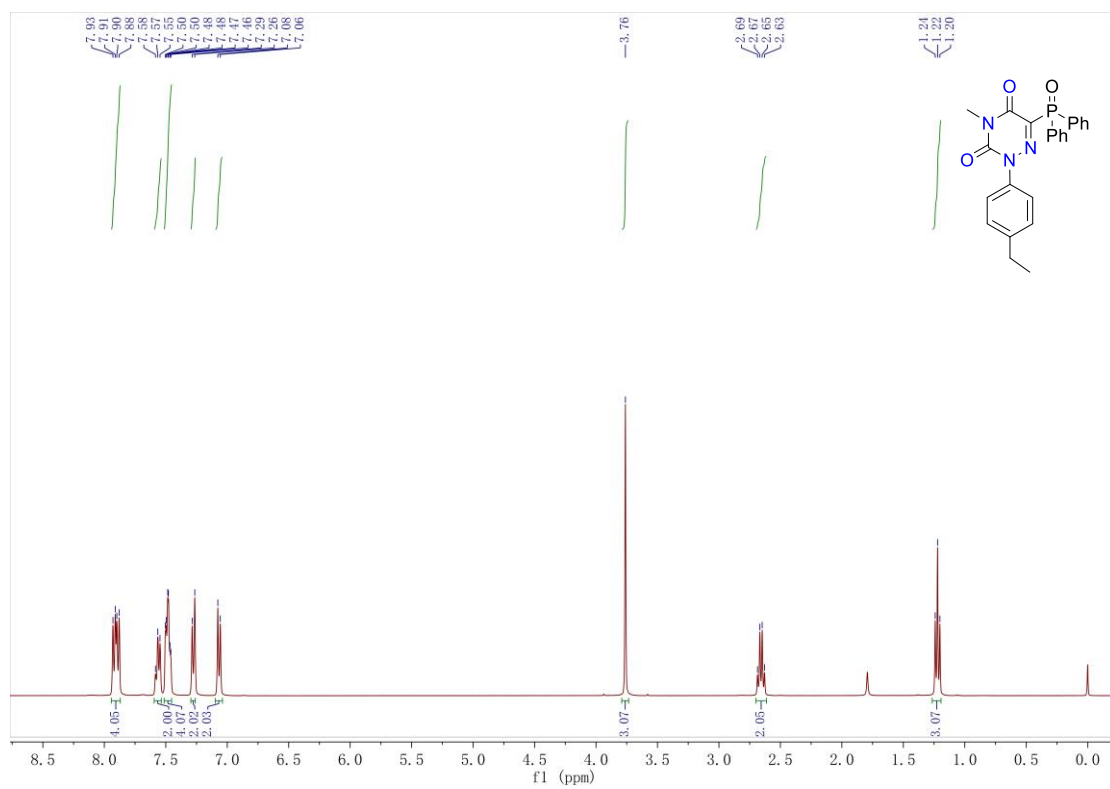

**3q-<sup>31</sup>P**

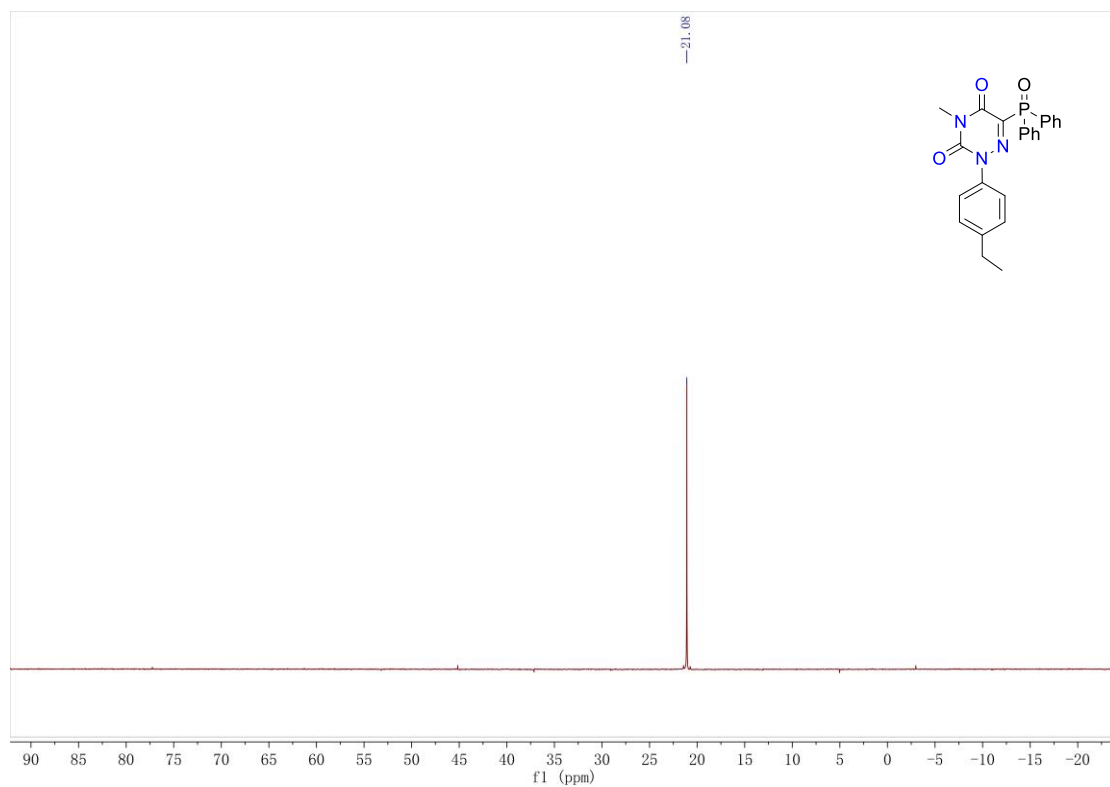

### 3q-<sup>13</sup>C

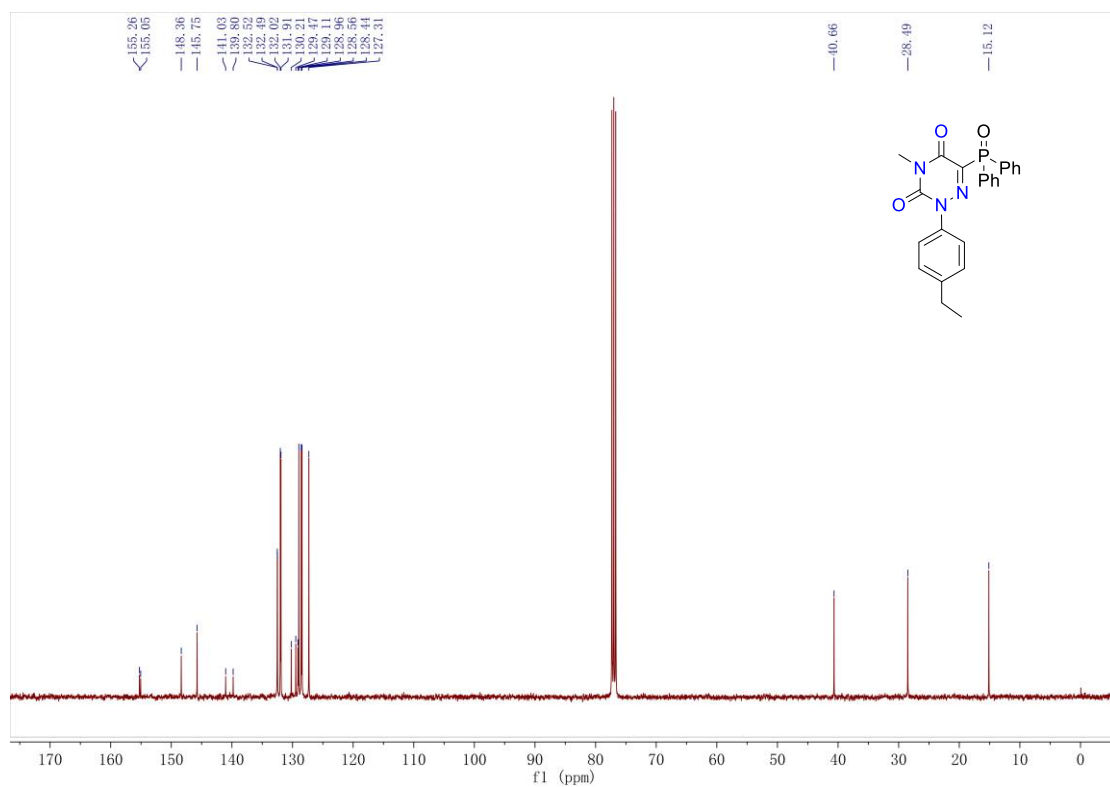

### 3r-<sup>1</sup>H

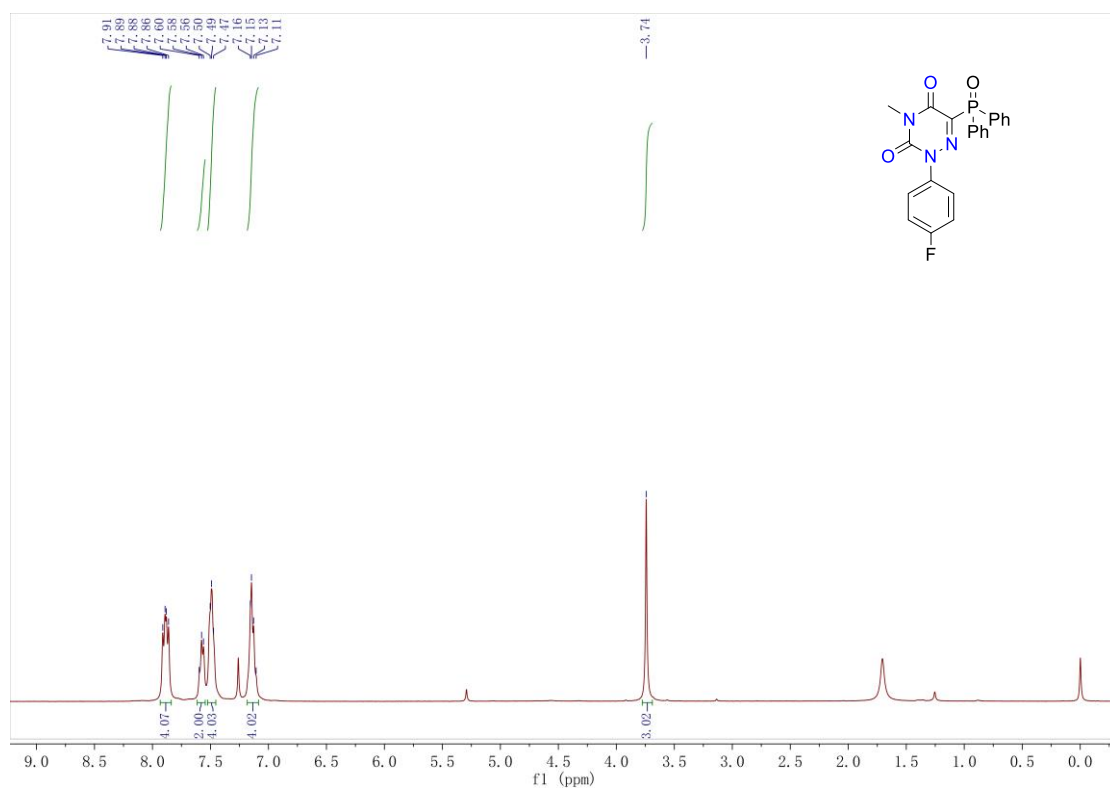

**3r-<sup>31</sup>P**

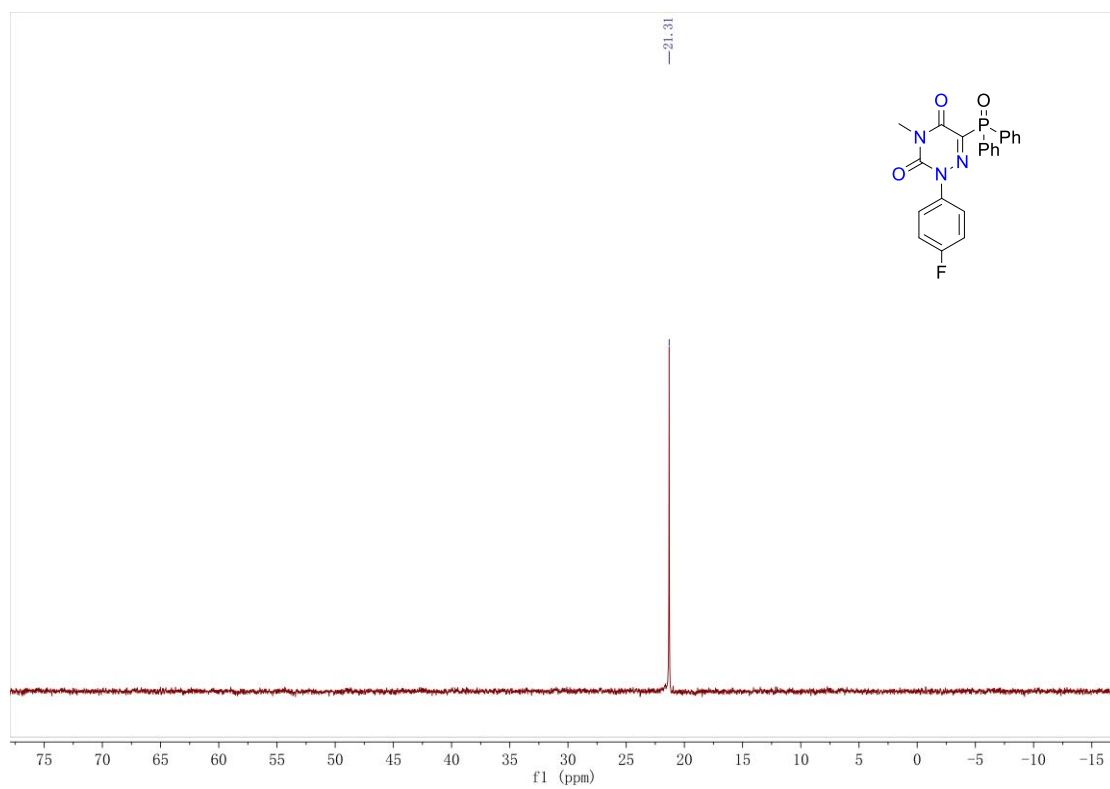

**3r-<sup>13</sup>C**

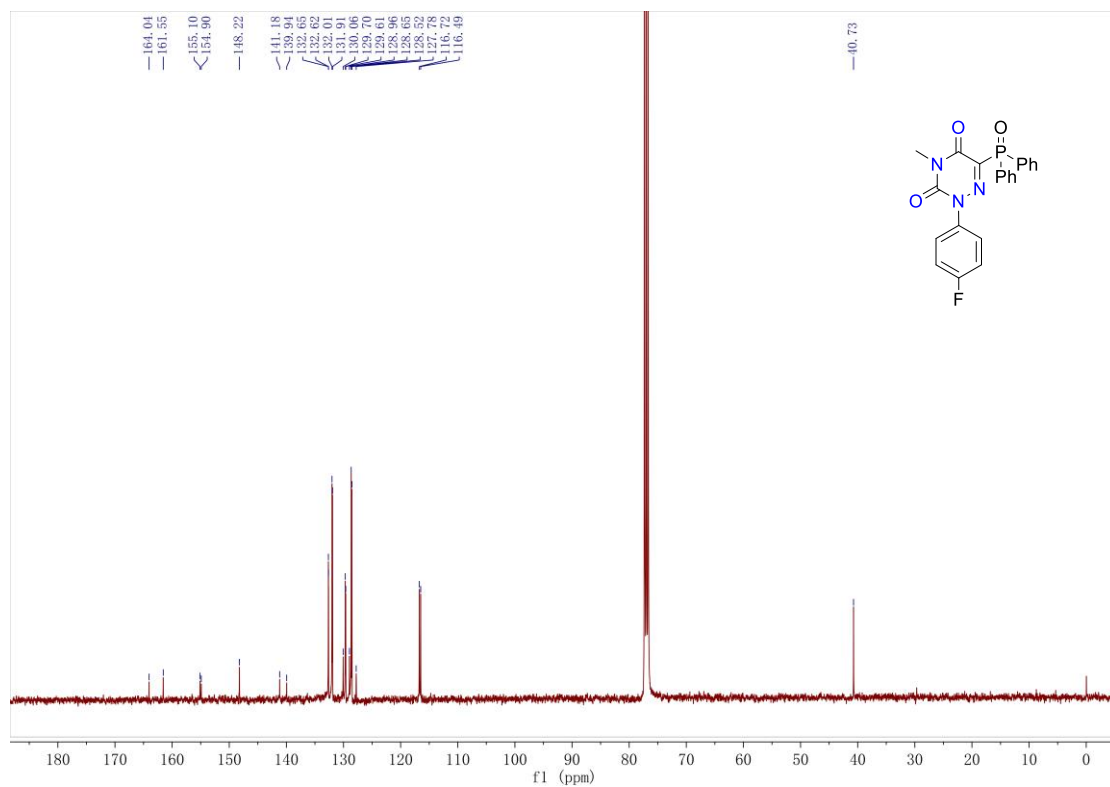

**3s-<sup>1</sup>H**

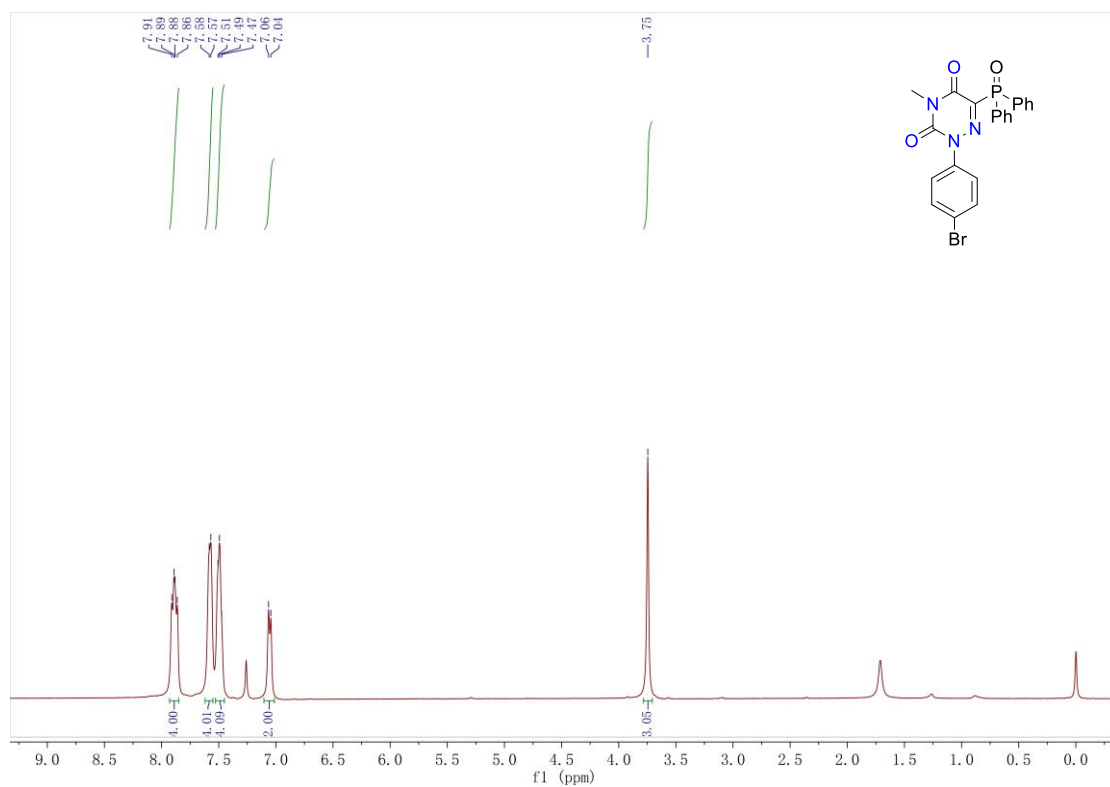

**3s-<sup>31</sup>P**

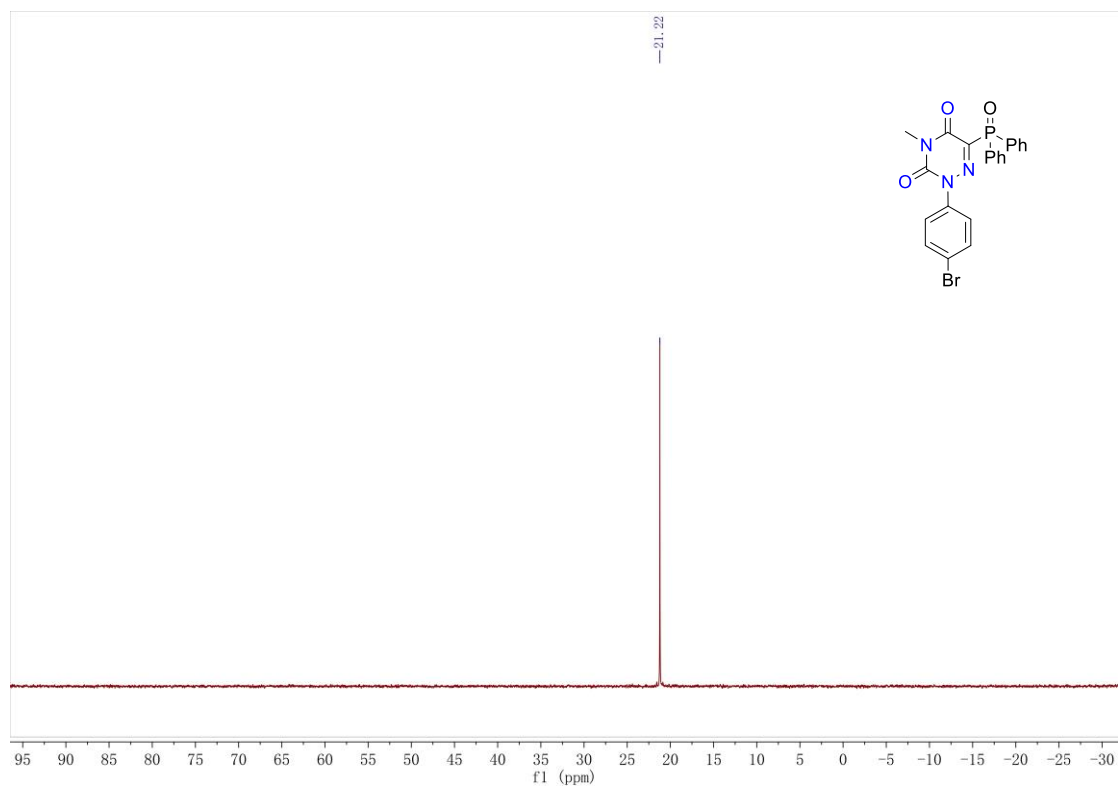

**3s-<sup>13</sup>C**

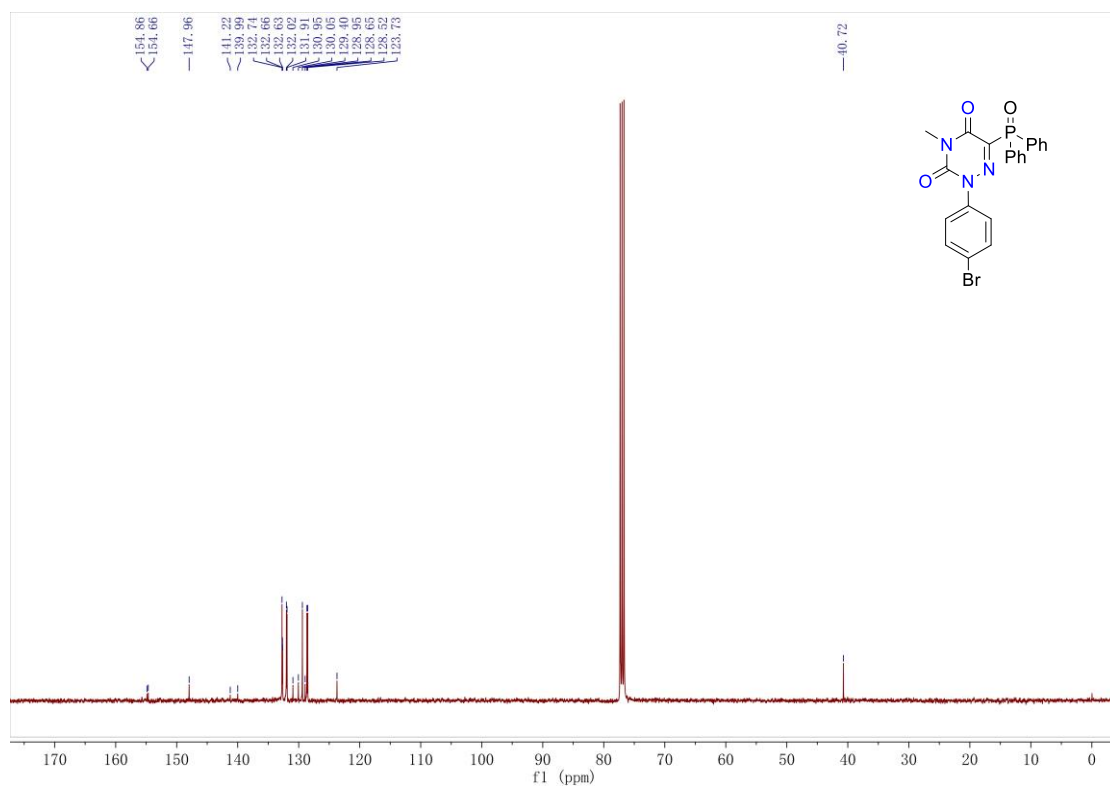

**3t-<sup>1</sup>H**

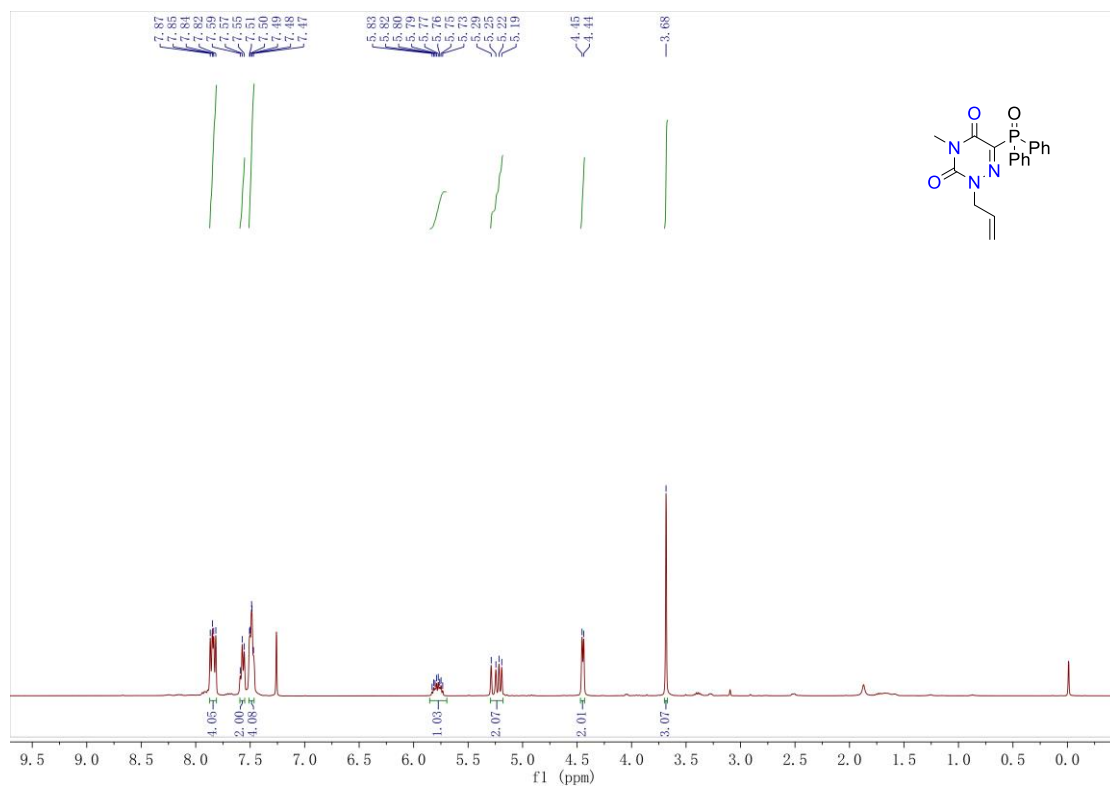

**3t-<sup>31</sup>P**

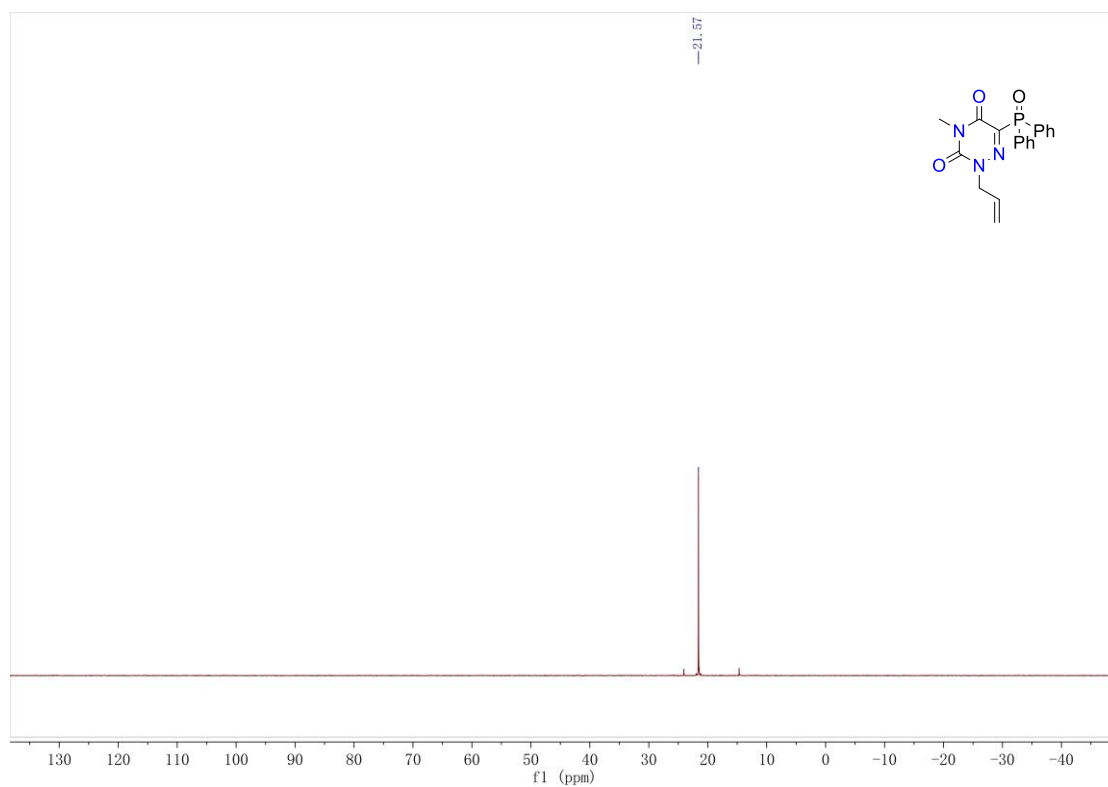

**3t-<sup>13</sup>C**

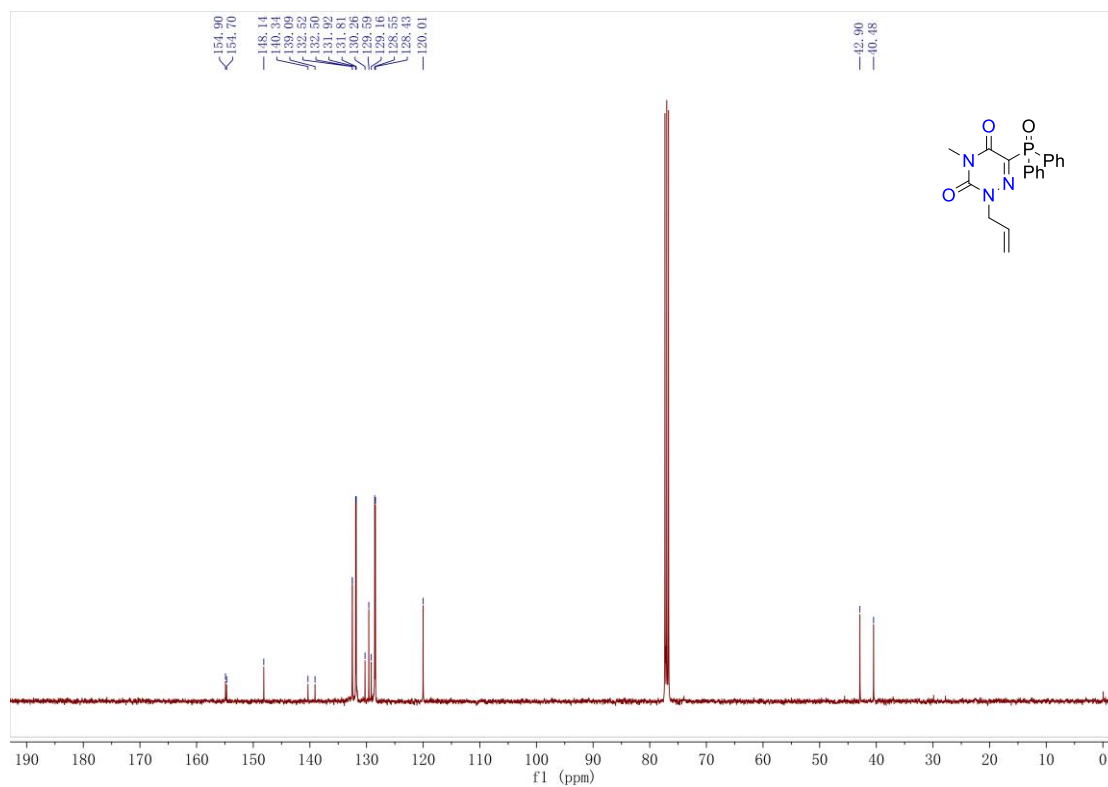

**3u-<sup>1</sup>H**

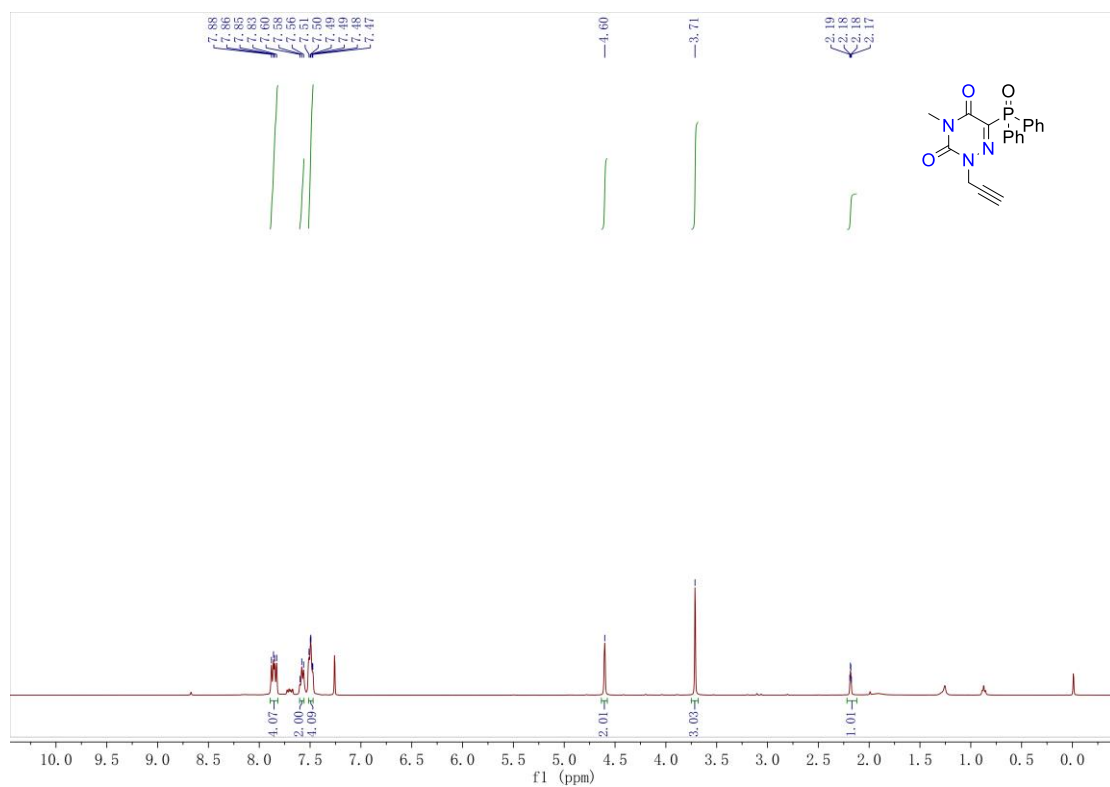

**3u-<sup>31</sup>P**

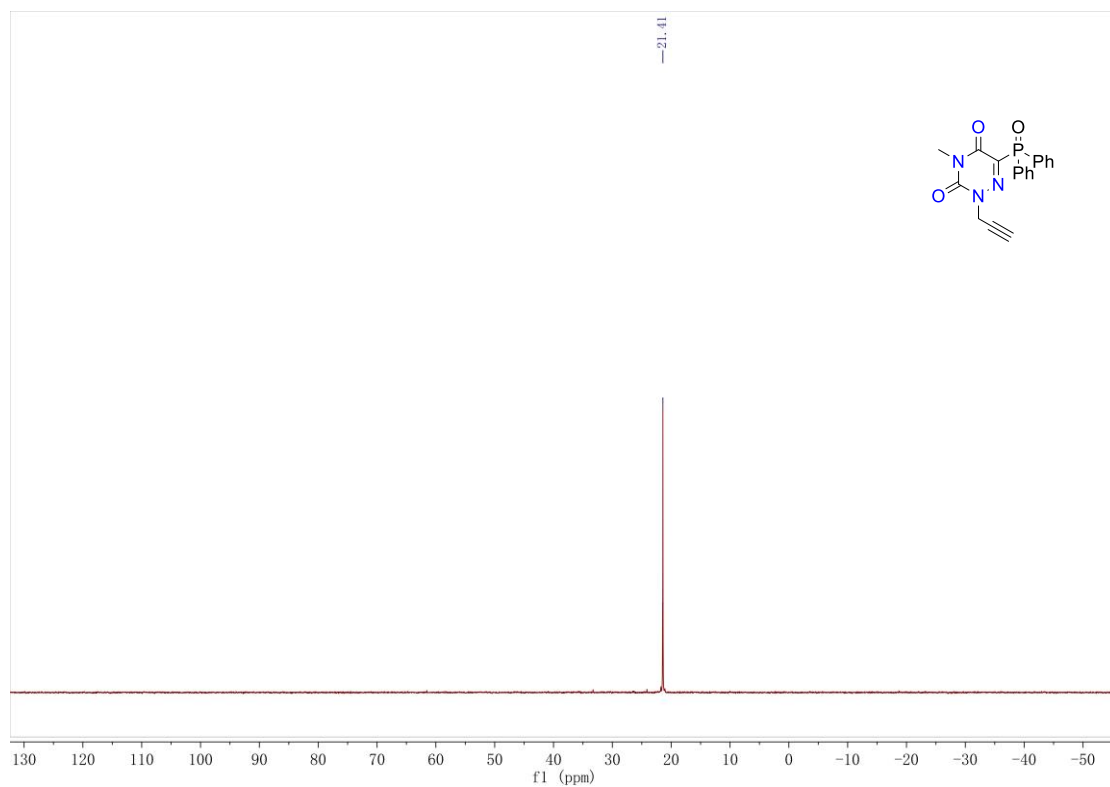



### 3u-<sup>13</sup>C

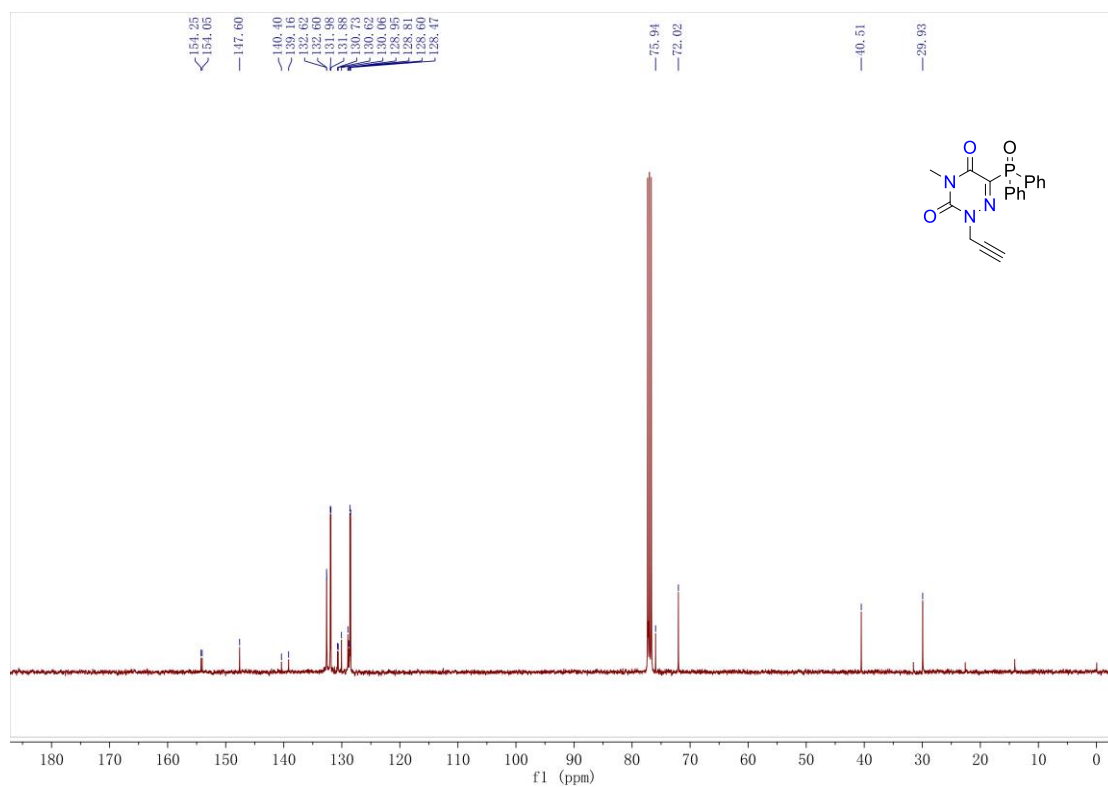

### 3v-<sup>1</sup>H

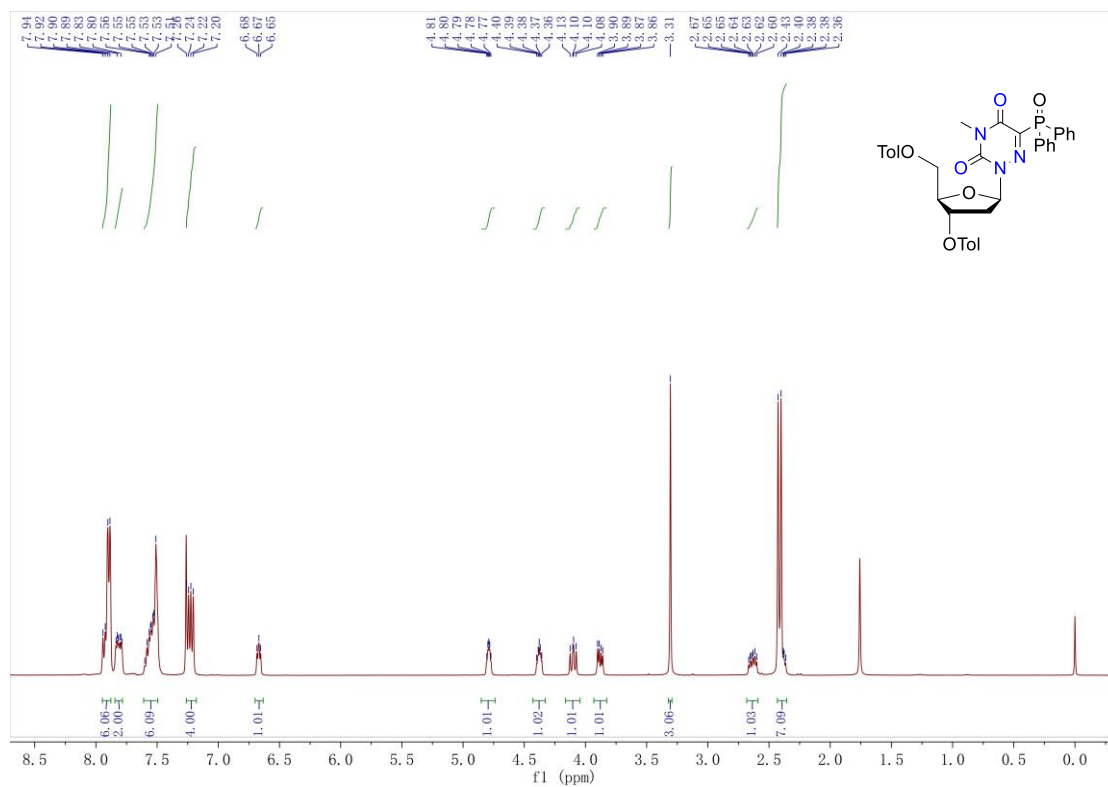

3v-<sup>31</sup>P

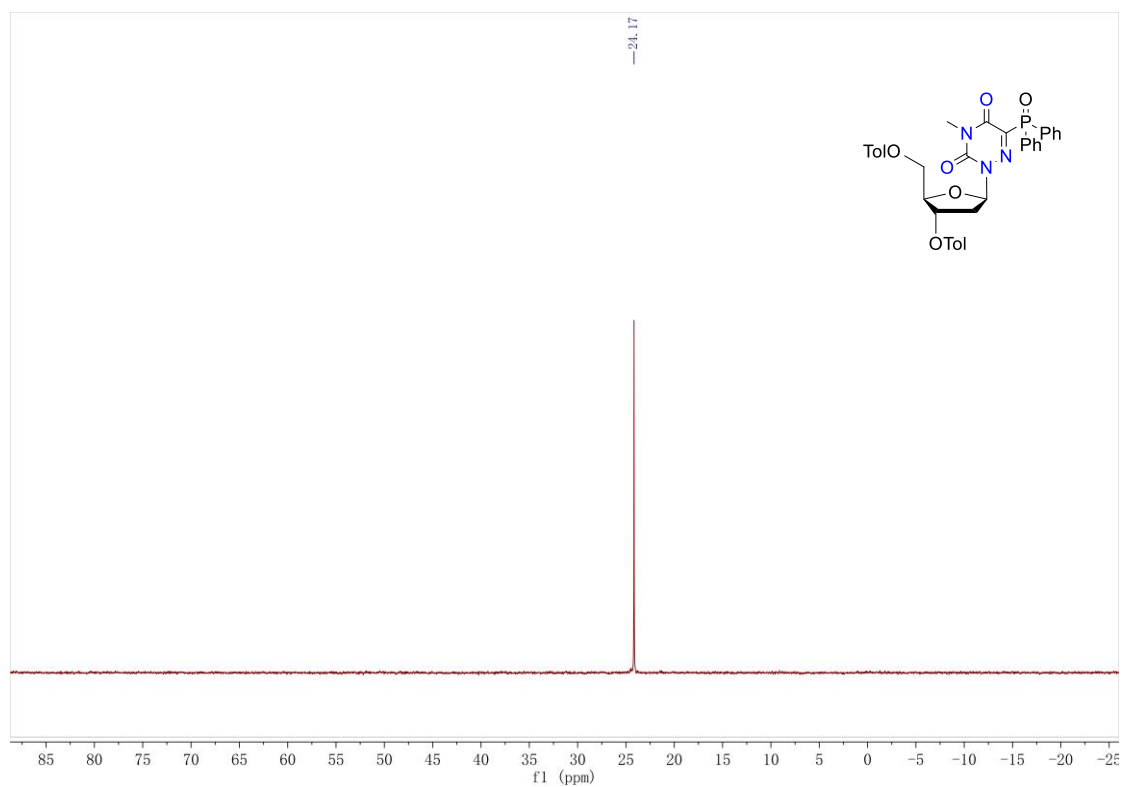

3v-<sup>13</sup>C

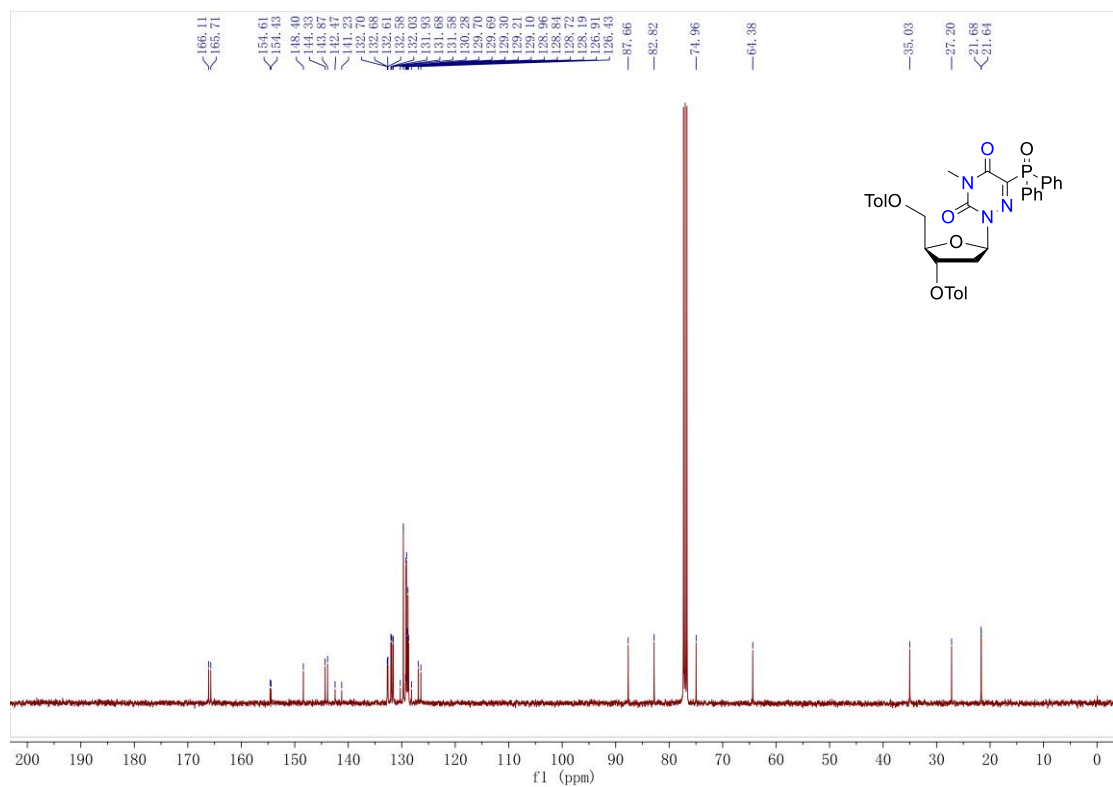

**3w-<sup>1</sup>H**

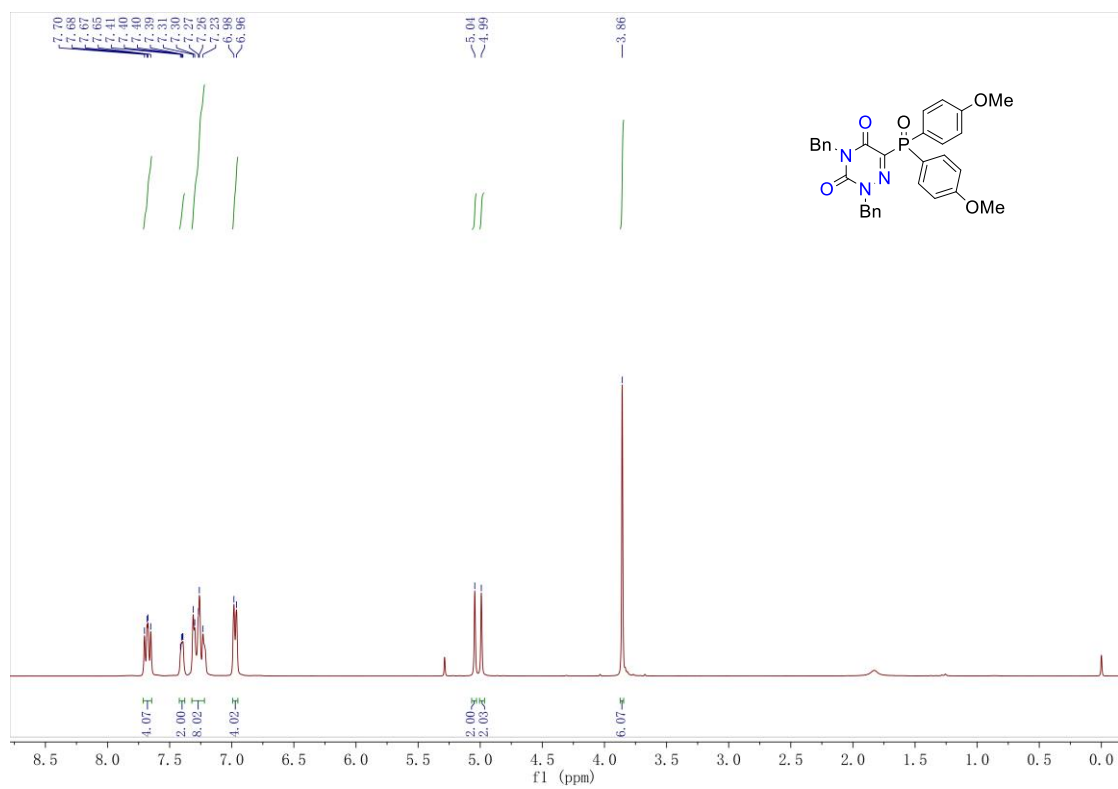

**3w-<sup>31</sup>P**

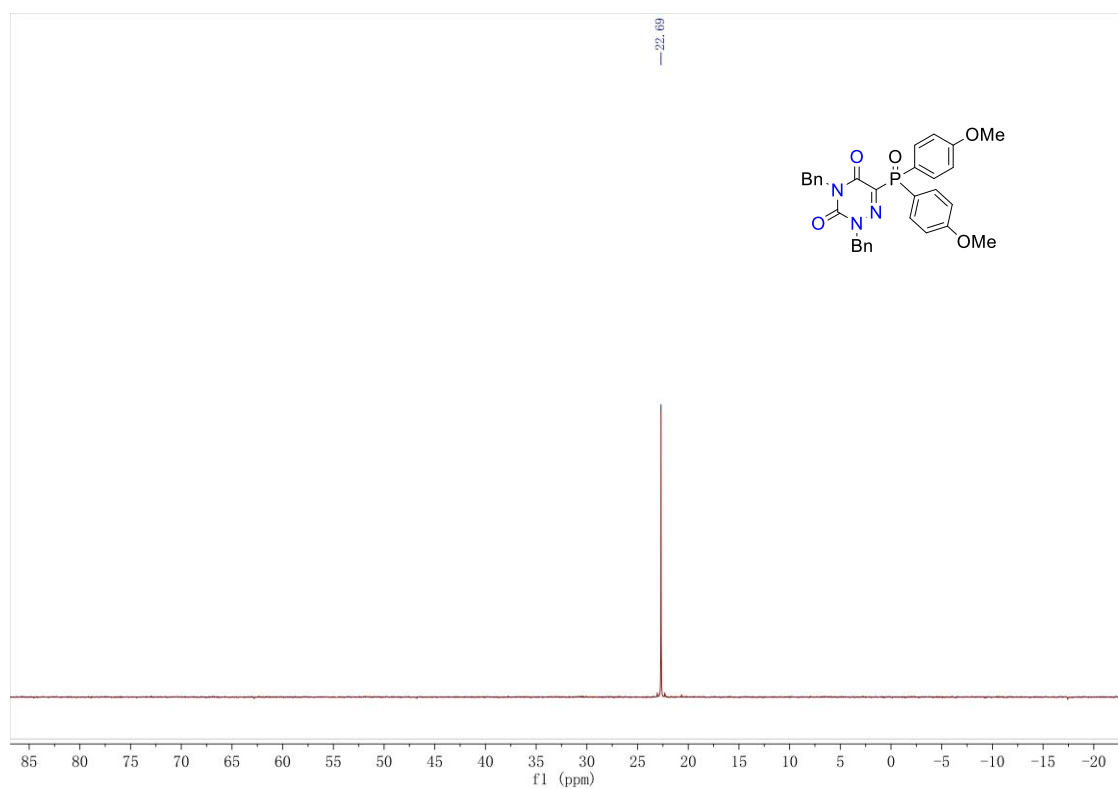

**3w-<sup>13</sup>C**

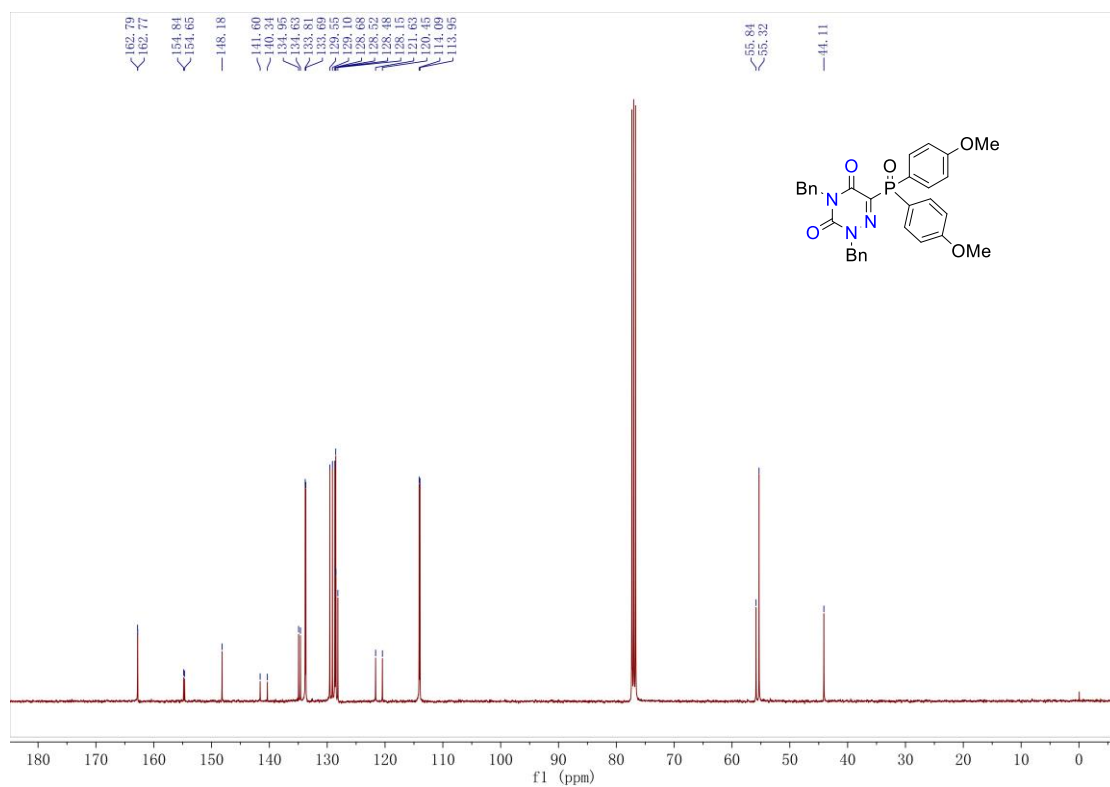

**3x-<sup>1</sup>H**

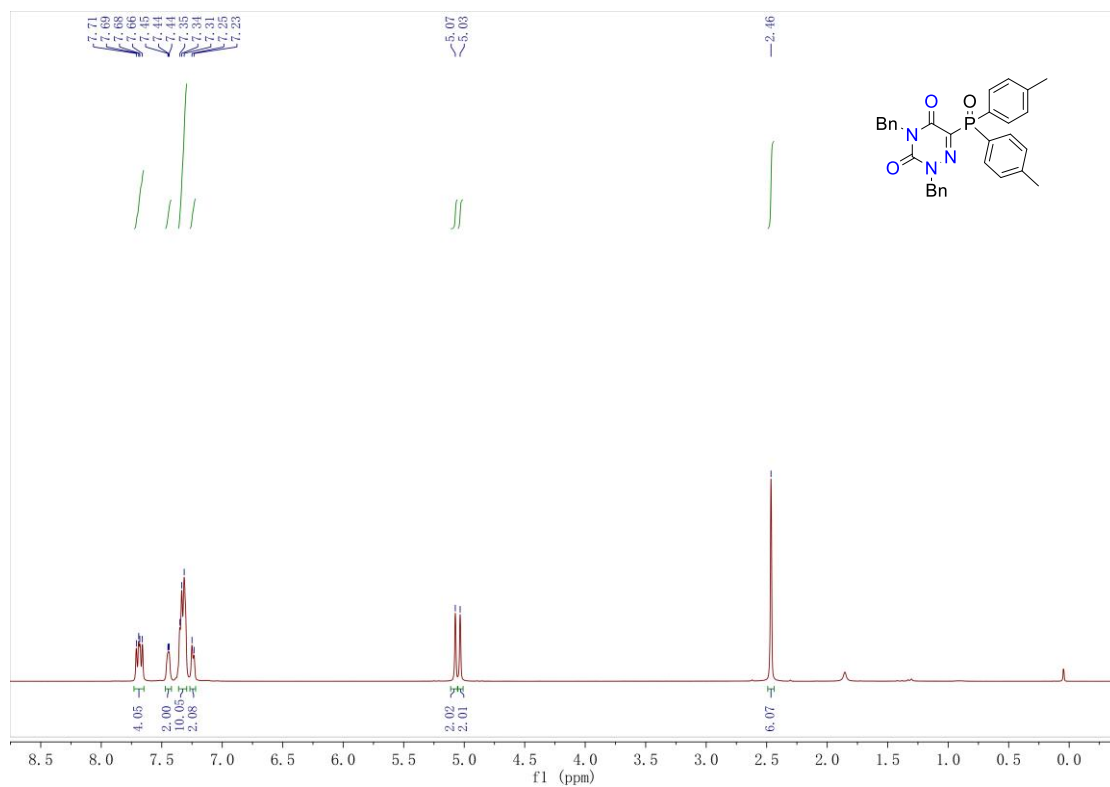

3x-<sup>31</sup>P

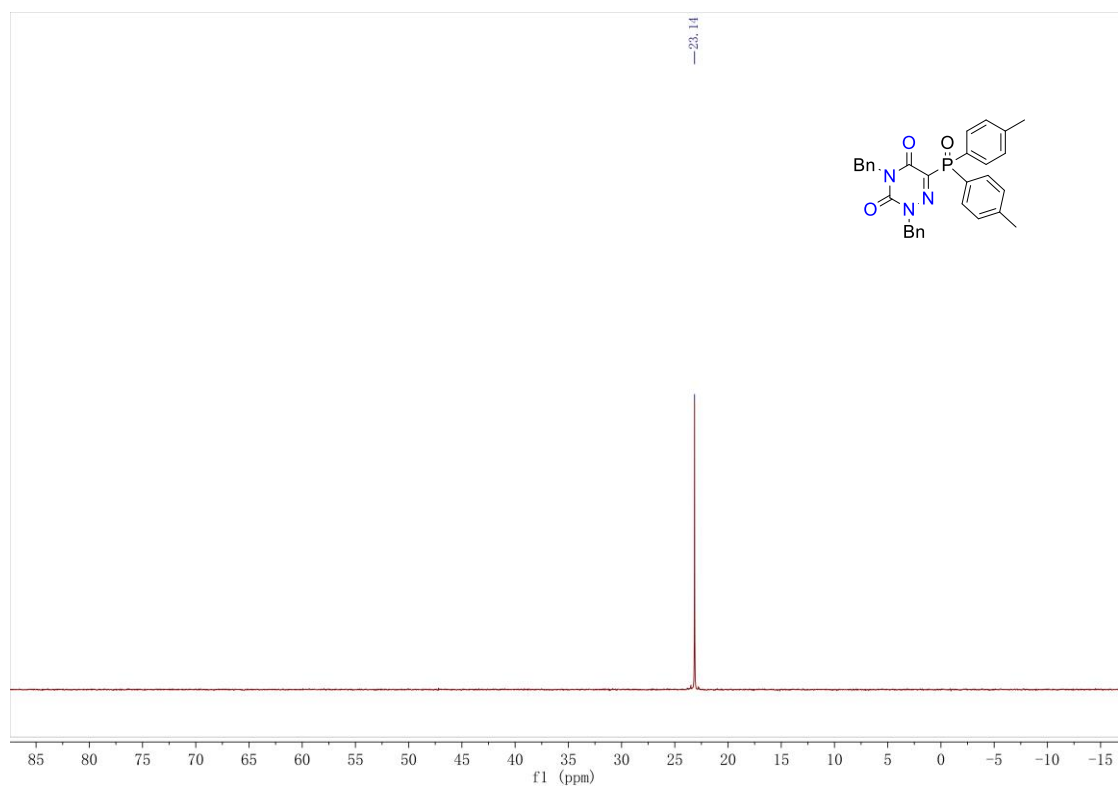

3x-<sup>13</sup>C

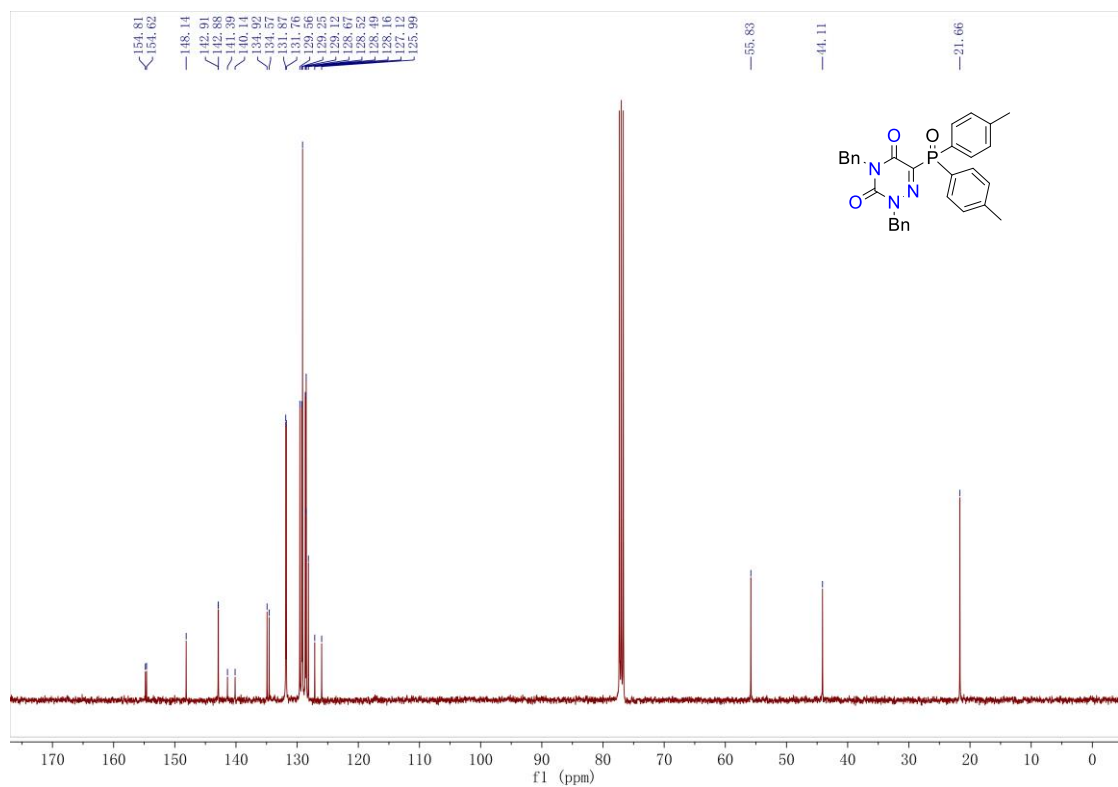

**3y-<sup>1</sup>H**

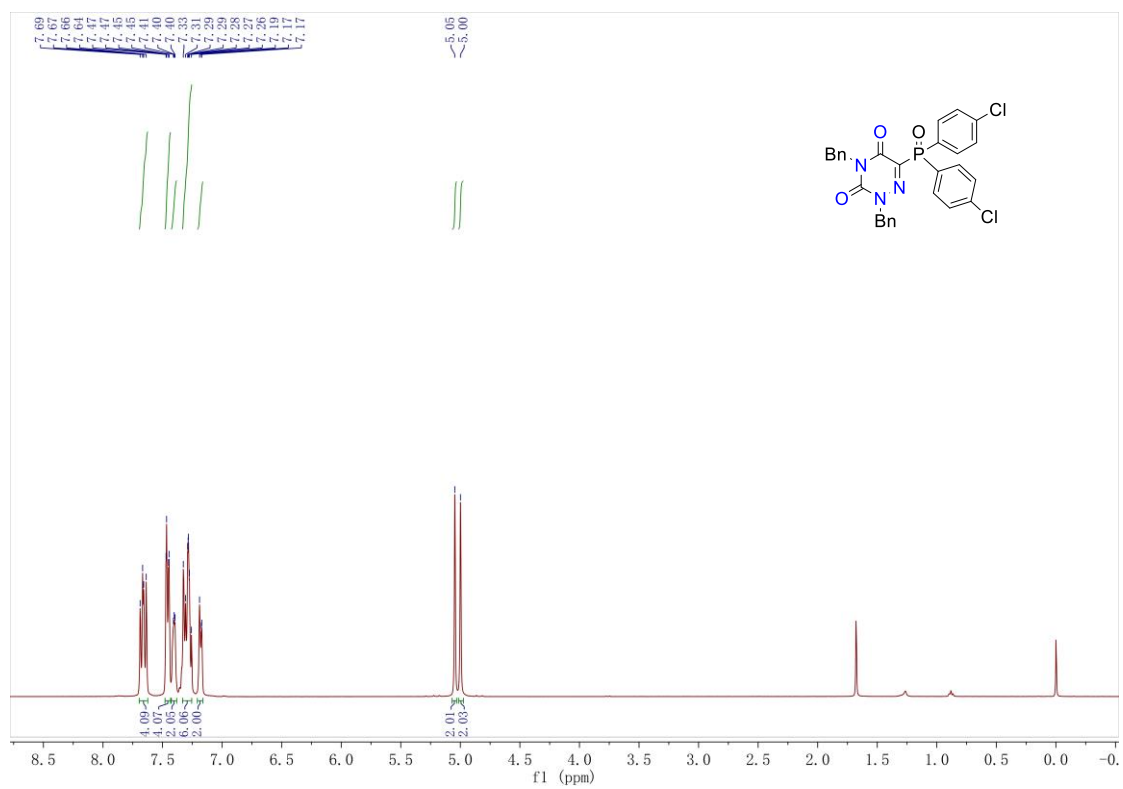

**3y-<sup>31</sup>P**

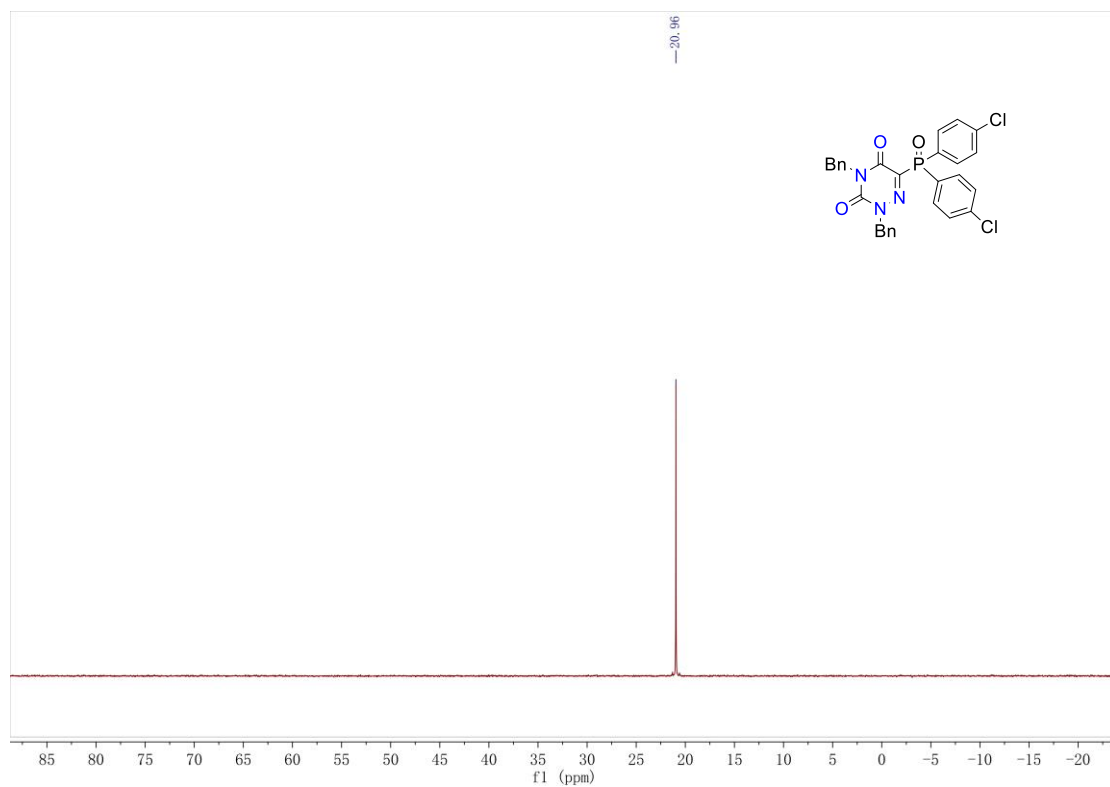

3y-<sup>13</sup>C

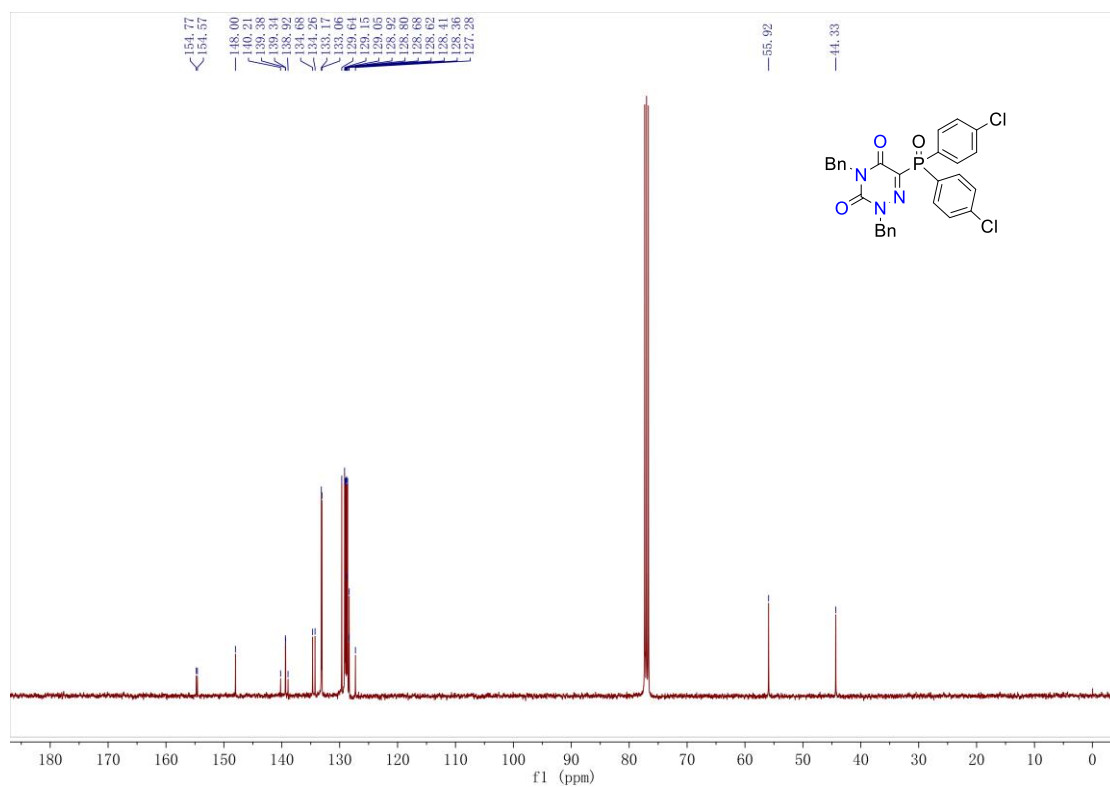

3z-<sup>1</sup>H

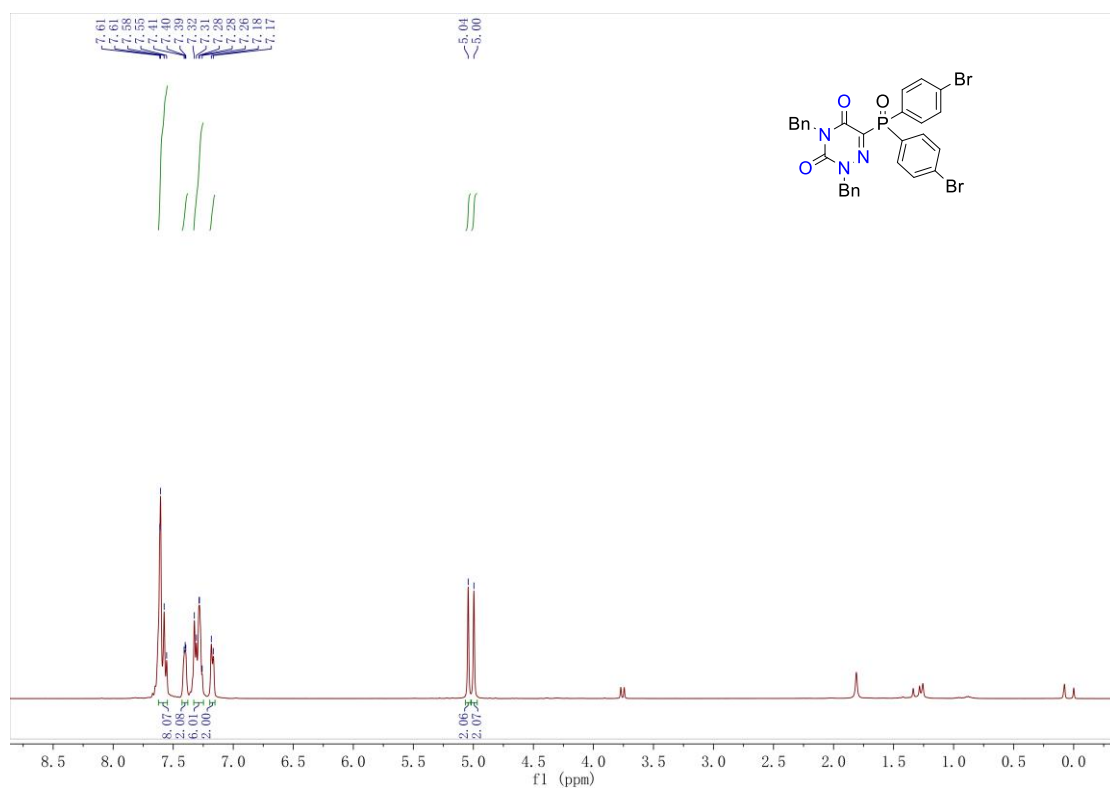

**3z-<sup>31</sup>P**

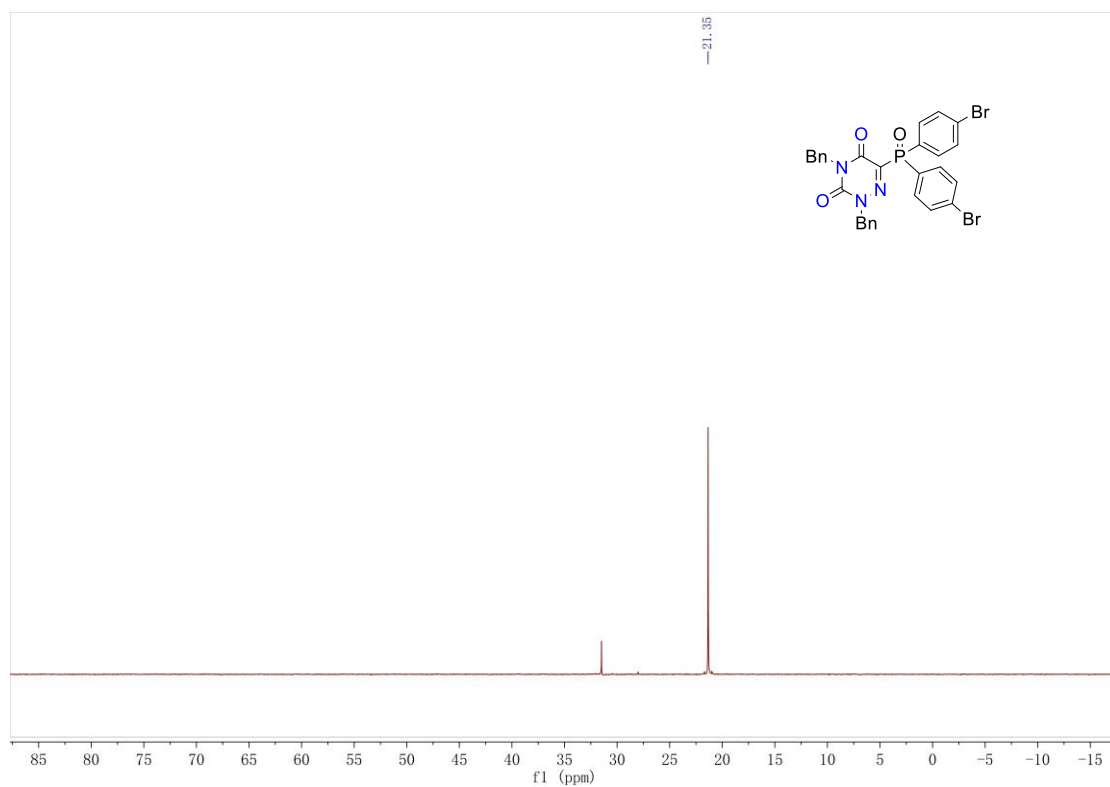

**3z-<sup>13</sup>C**

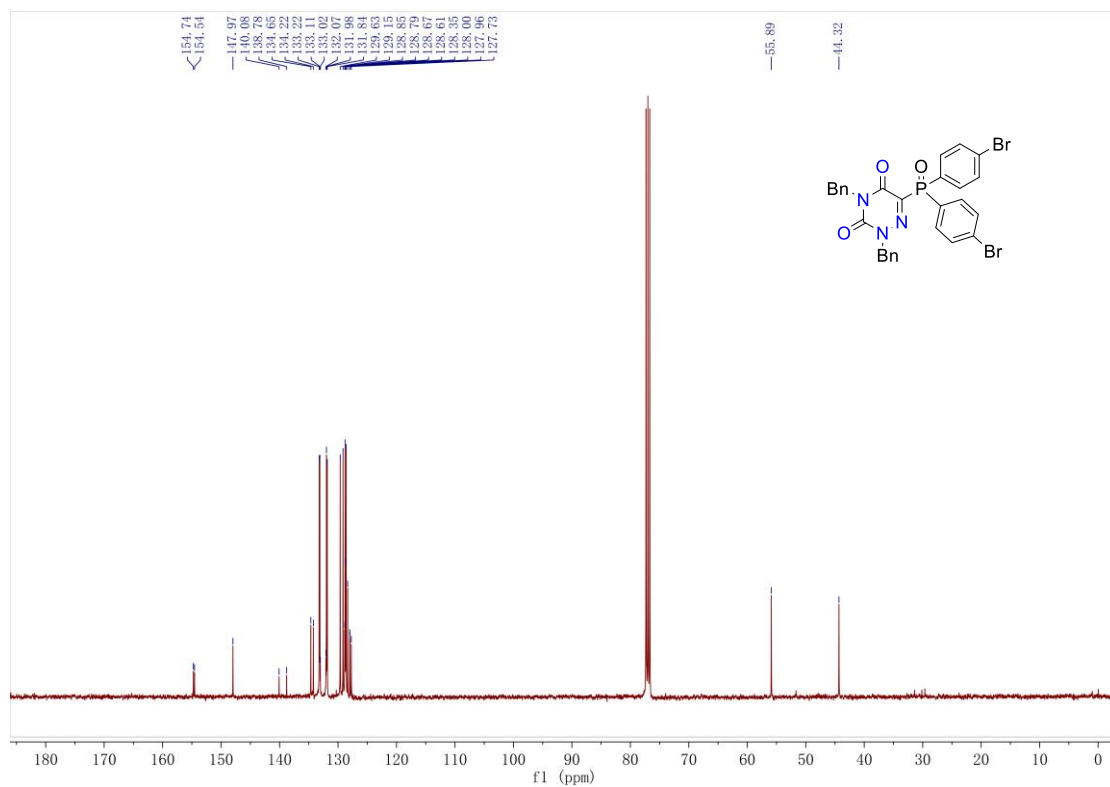



3aa-<sup>1</sup>H

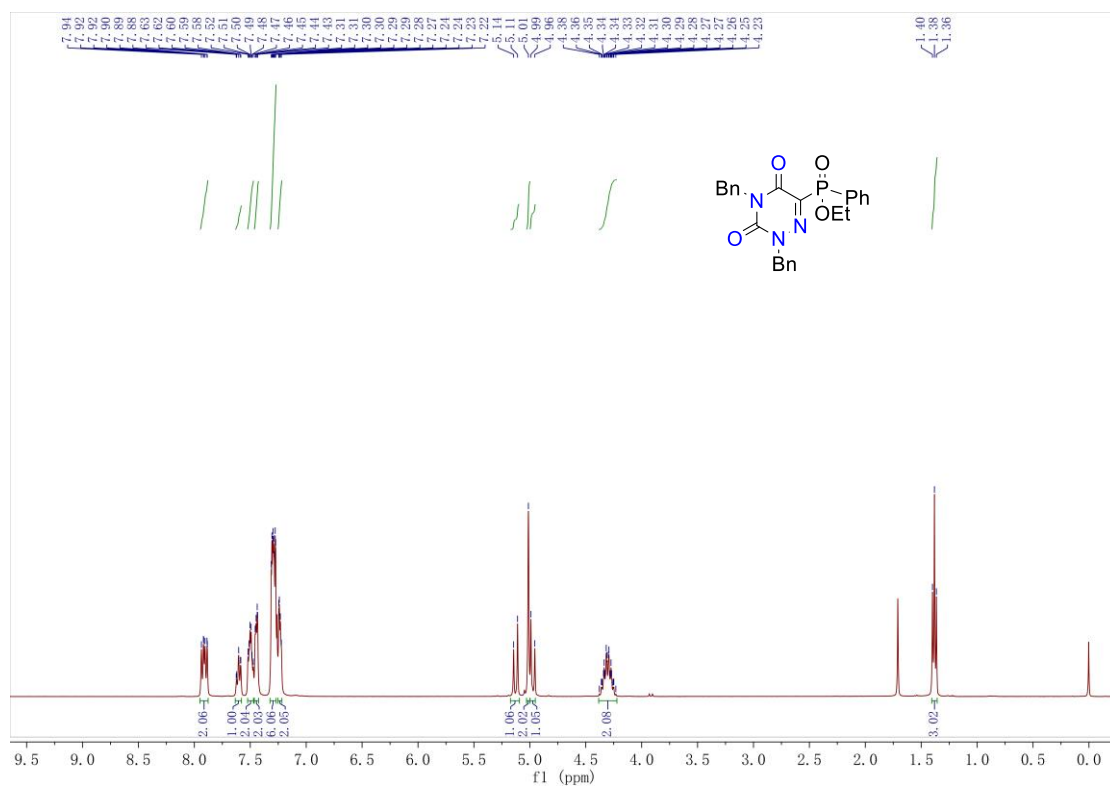

3aa-<sup>31</sup>P

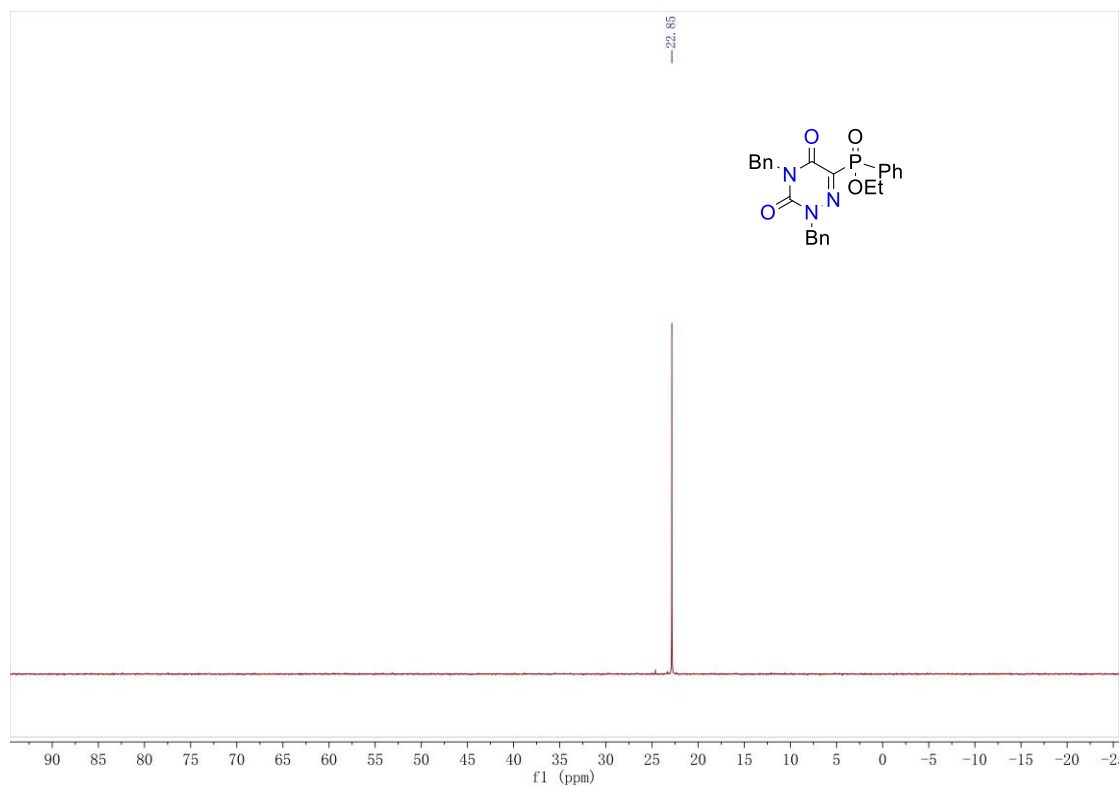

3aa-<sup>13</sup>C

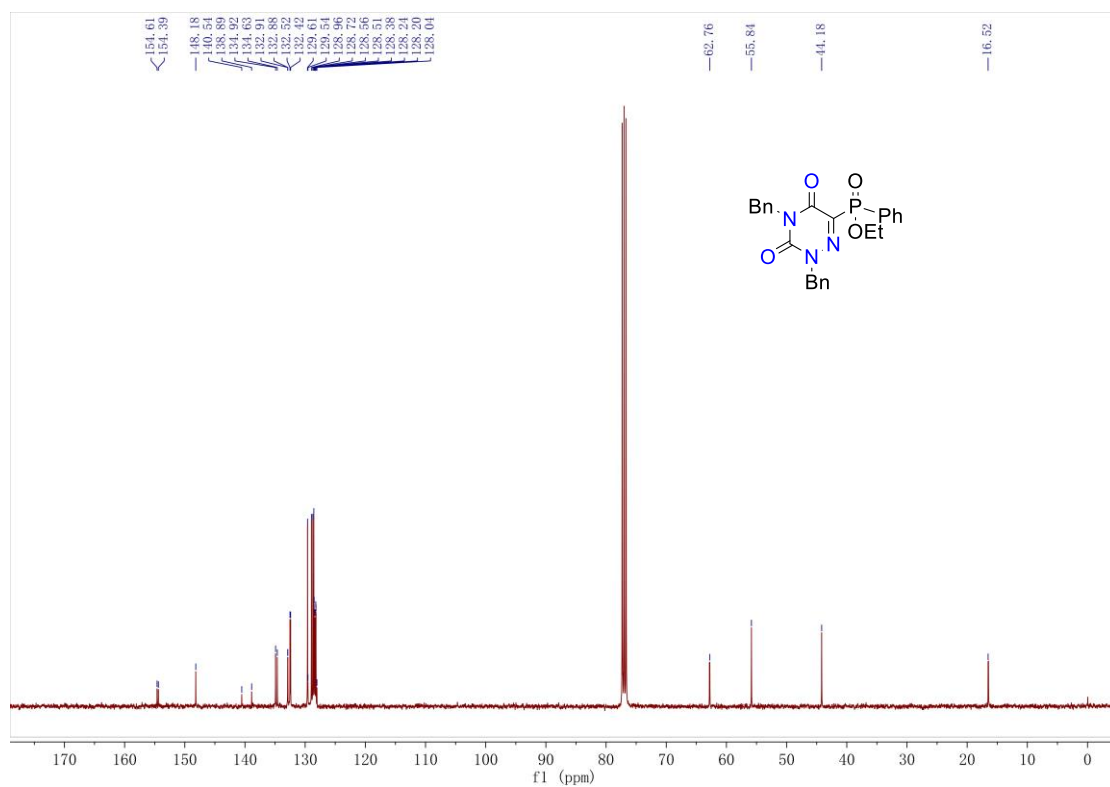

3ab-<sup>1</sup>H

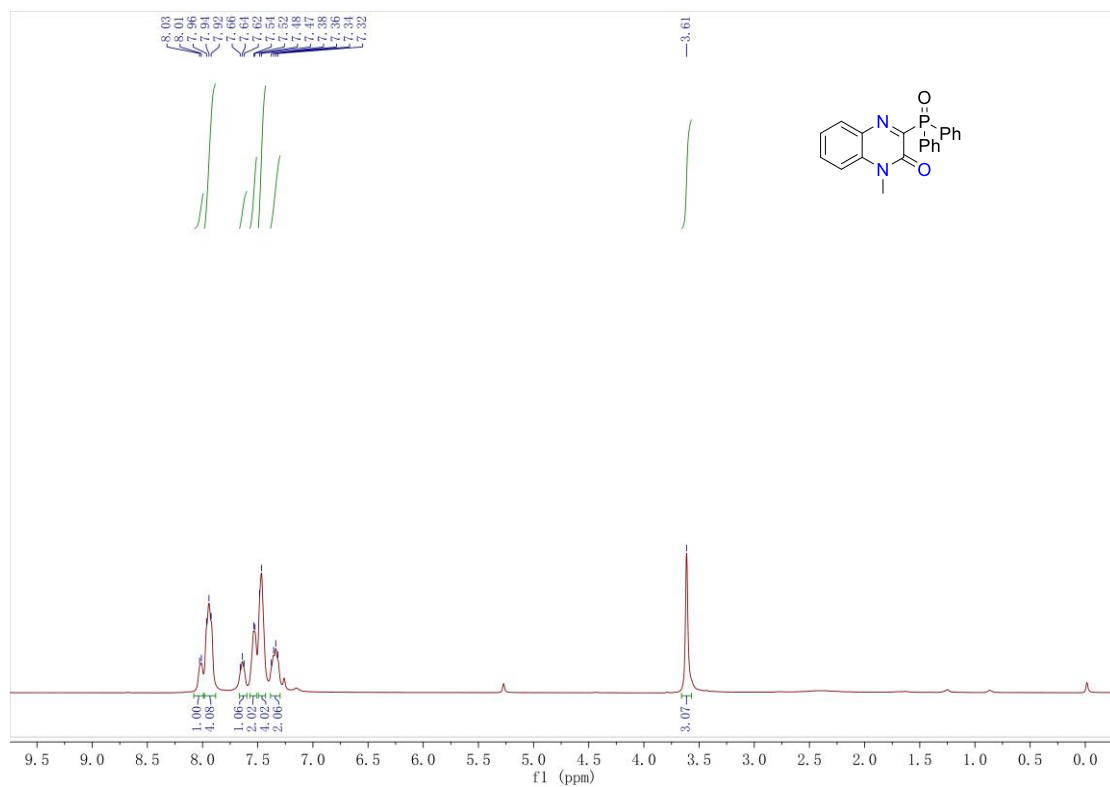

**3ac-<sup>1</sup>H**

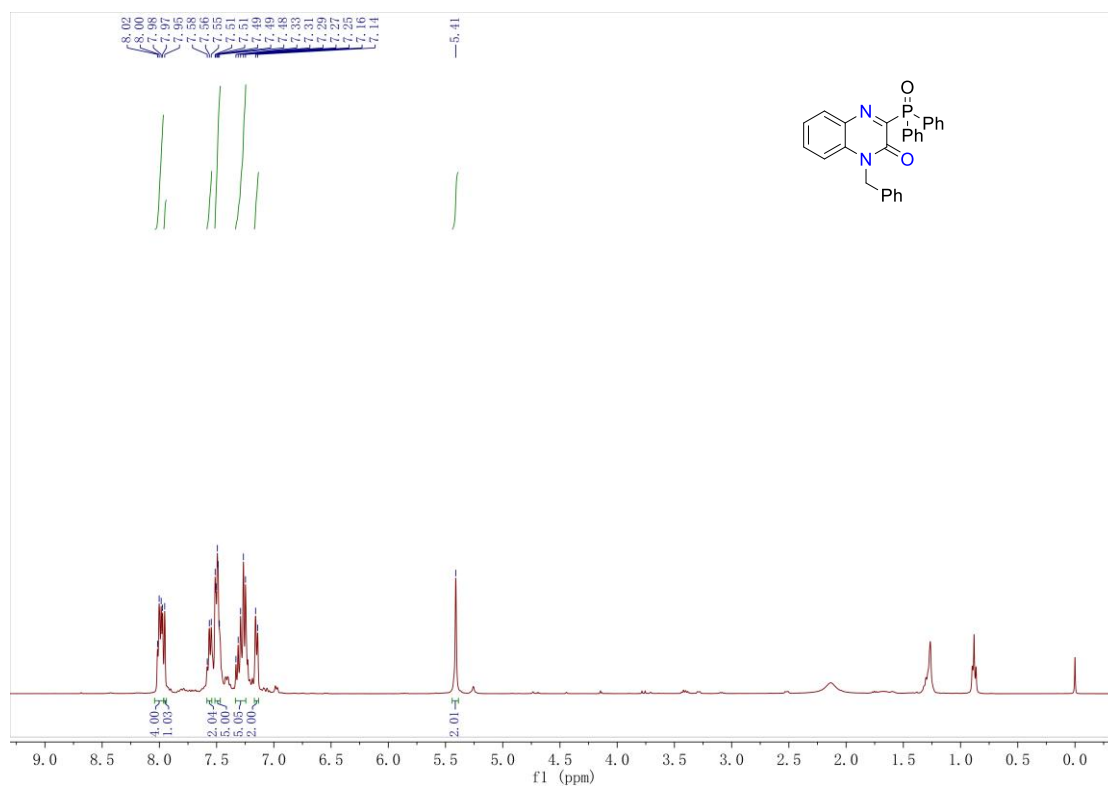

**3ad-<sup>1</sup>H**

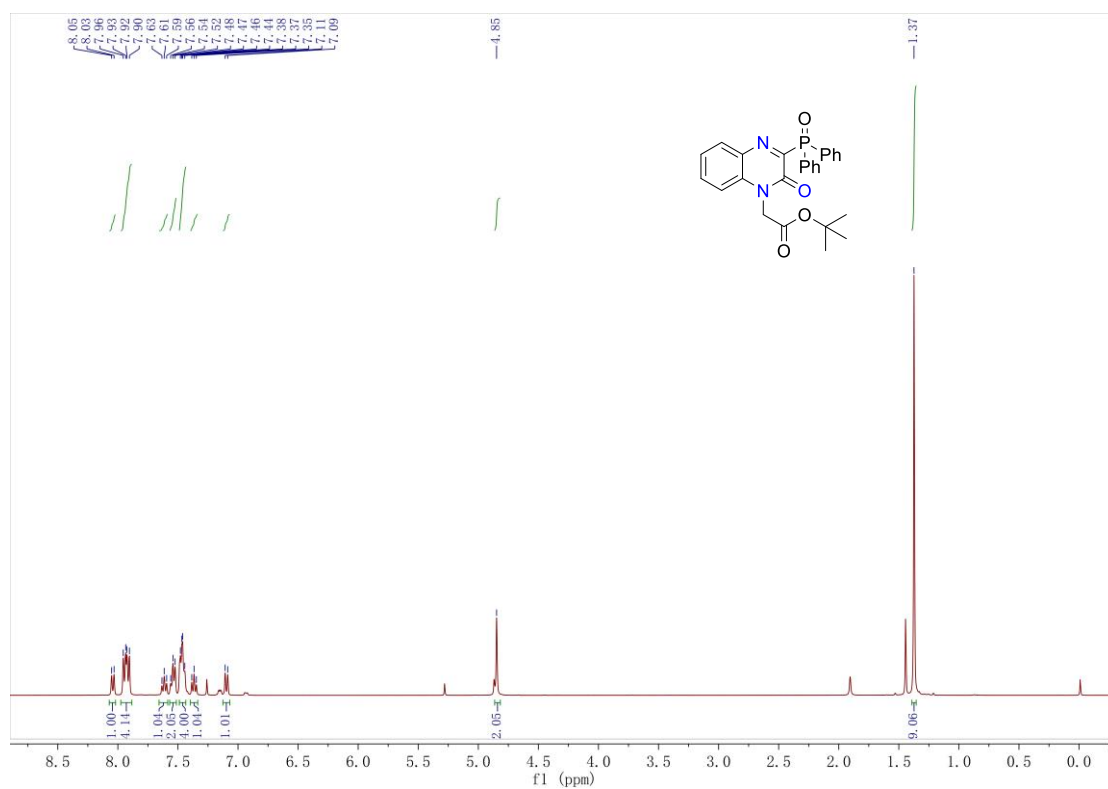

**3ad**-<sup>31</sup>P

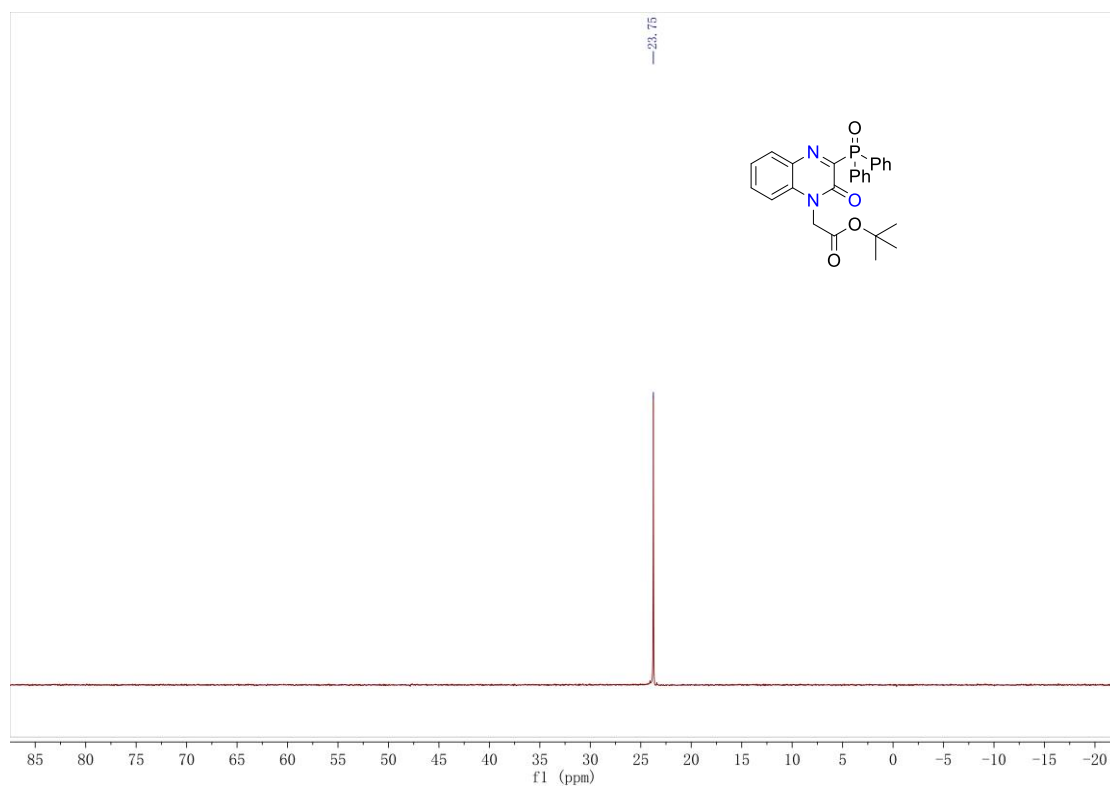

**3ad**-<sup>13</sup>C

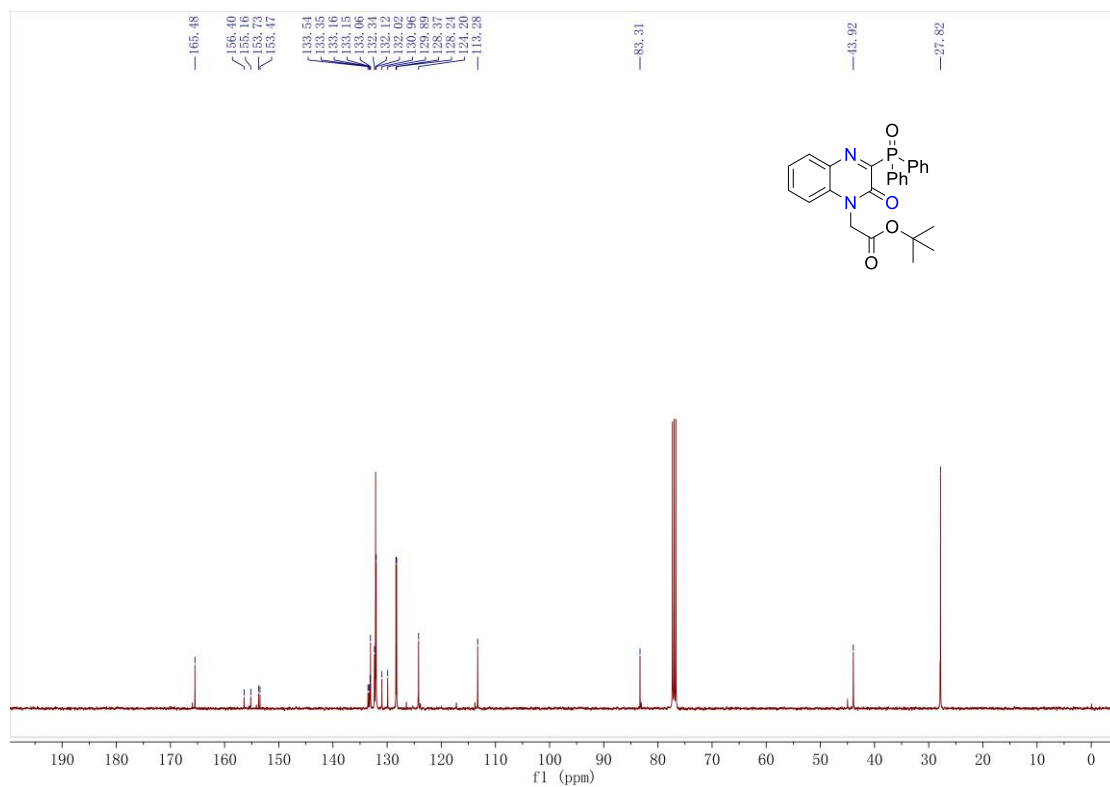

**3ae-<sup>1</sup>H**

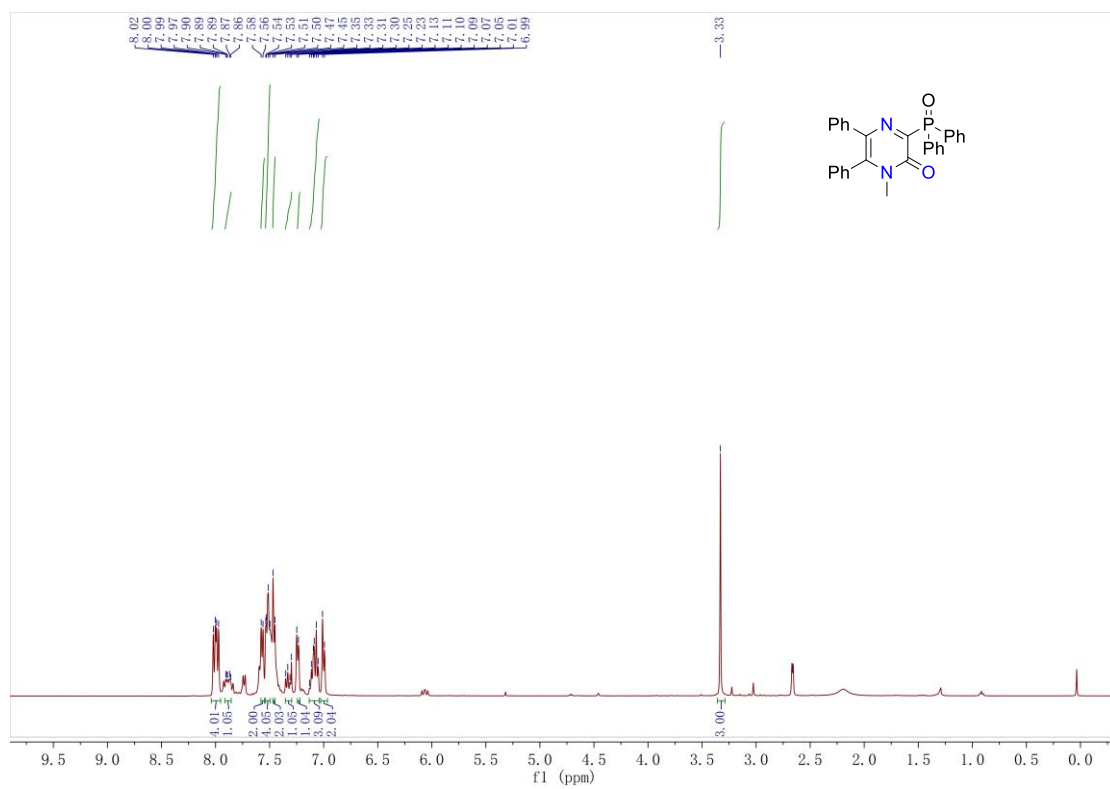

**3ae-<sup>31</sup>P**

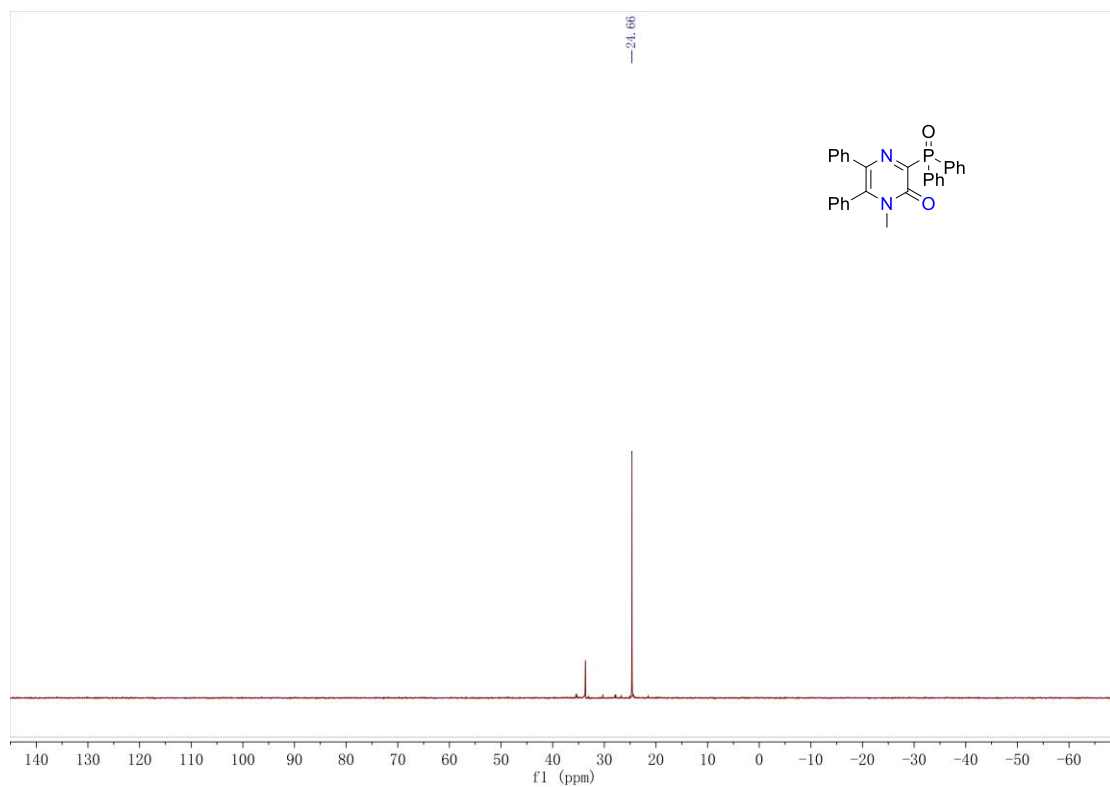

3ae-<sup>13</sup>C

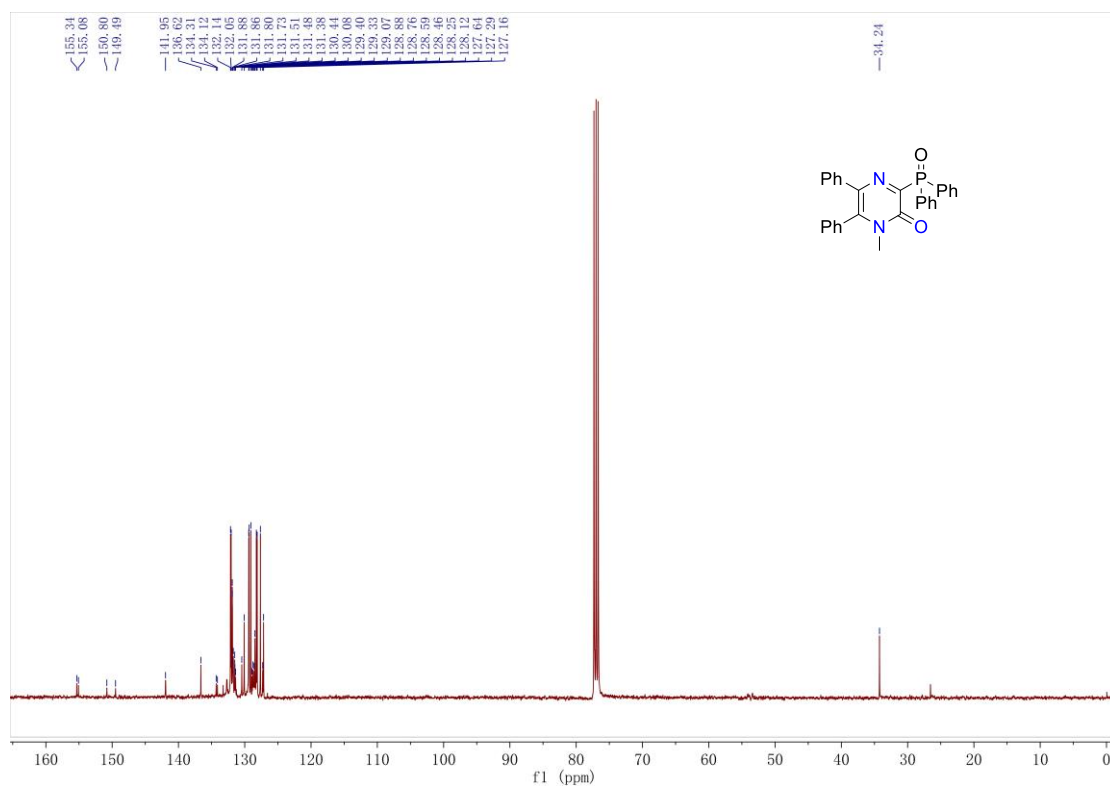

3af-<sup>1</sup>H

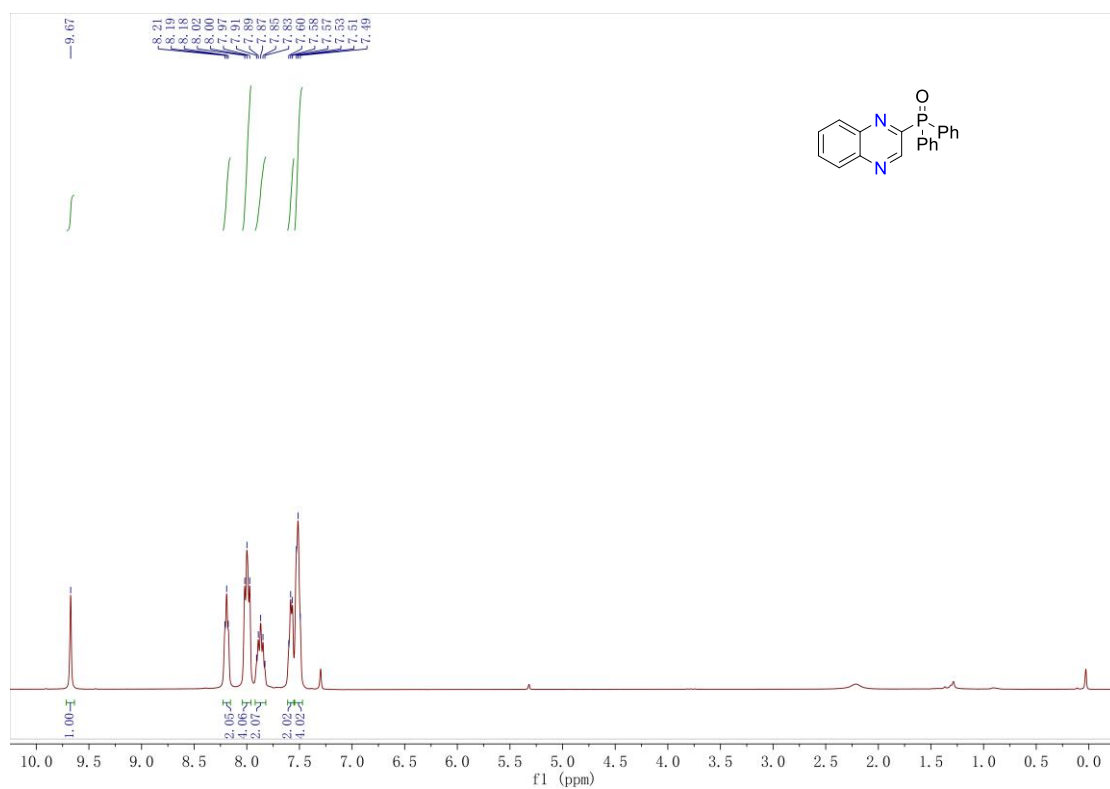

### 3ag-<sup>1</sup>H

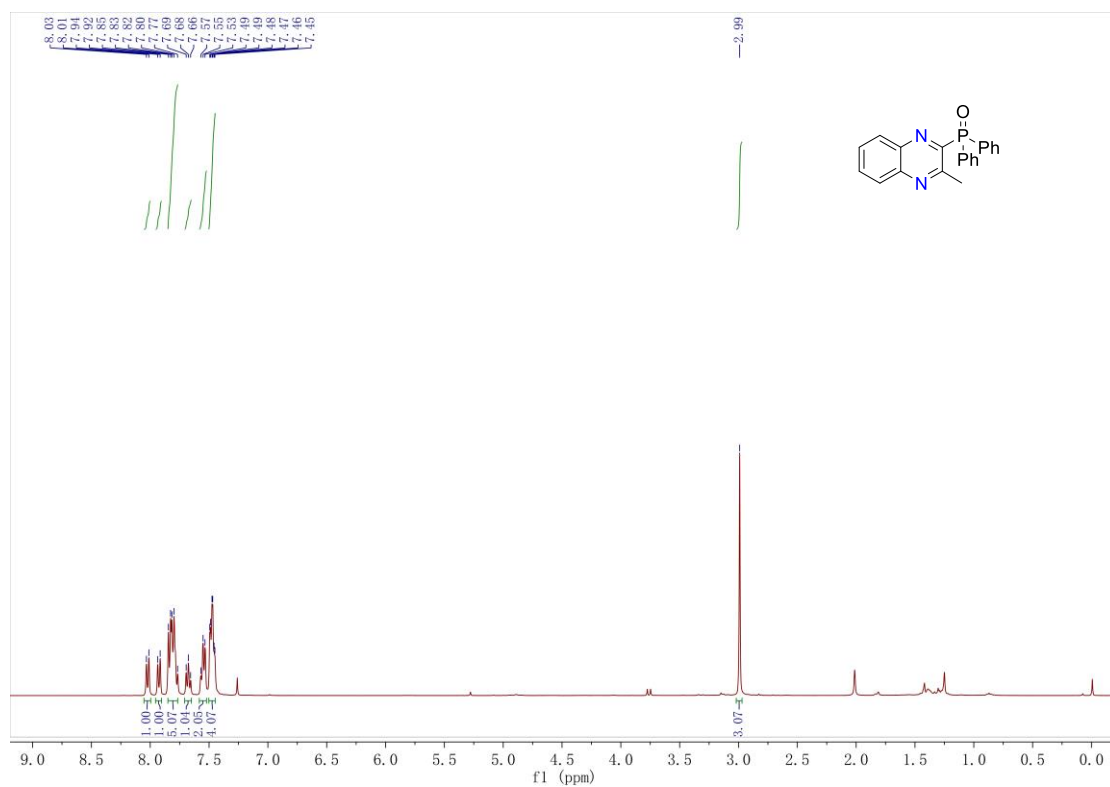

### 3ah-<sup>1</sup>H

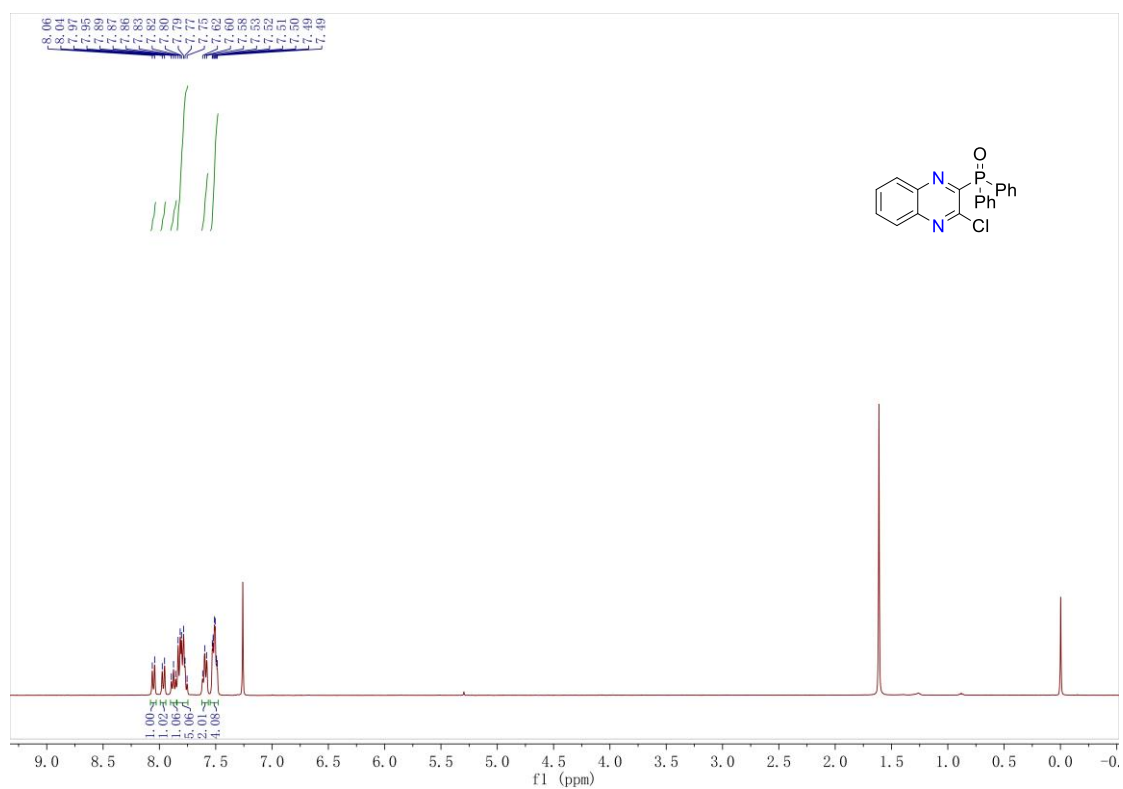

**3ai-<sup>1</sup>H**

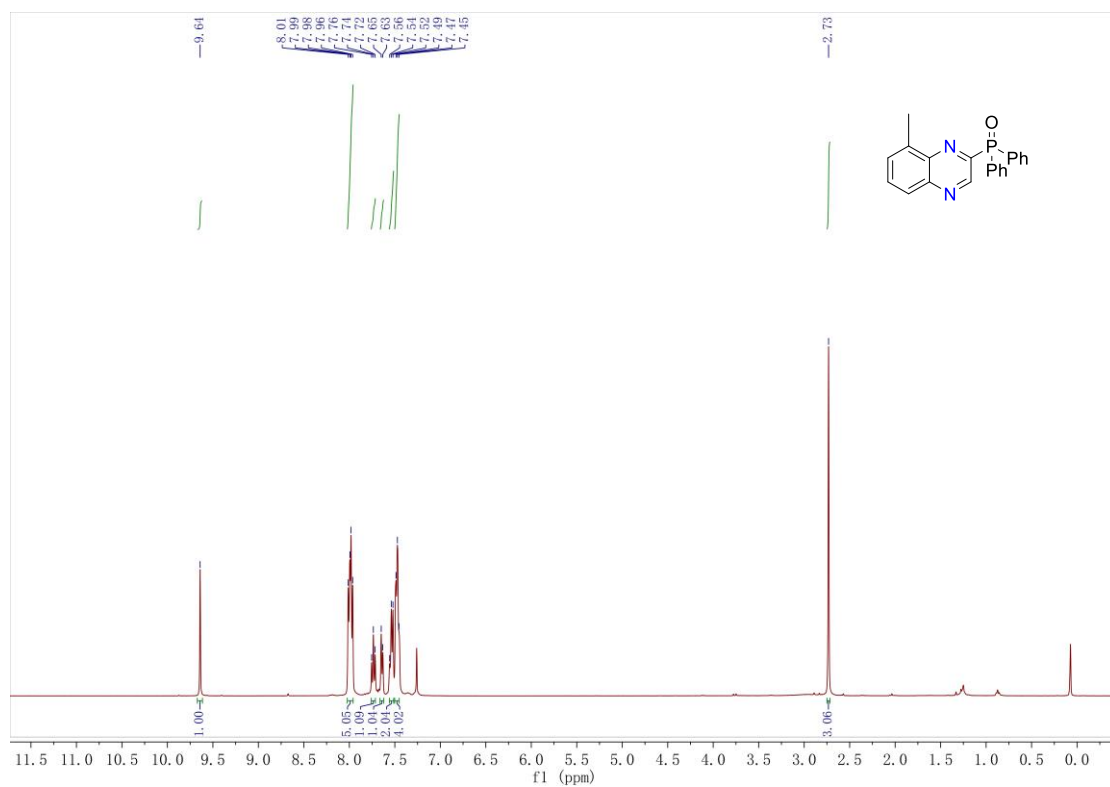

**3ai' -<sup>1</sup>H**

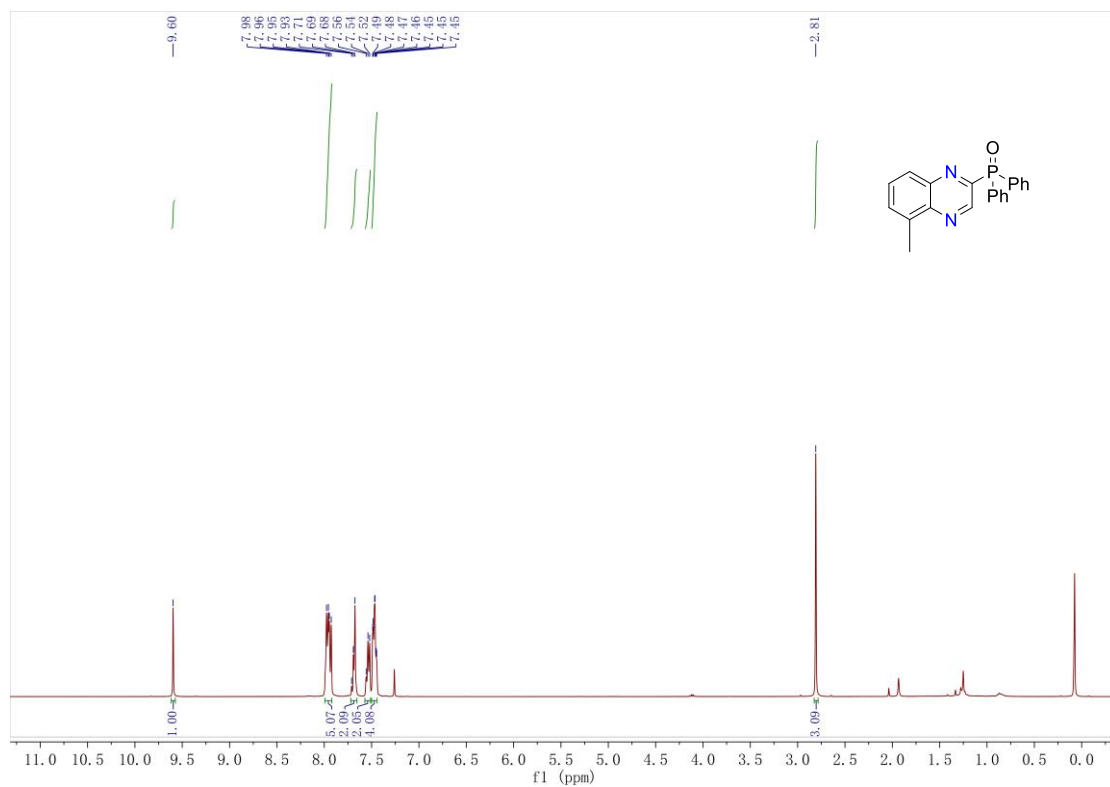



### 3ak-<sup>1</sup>H

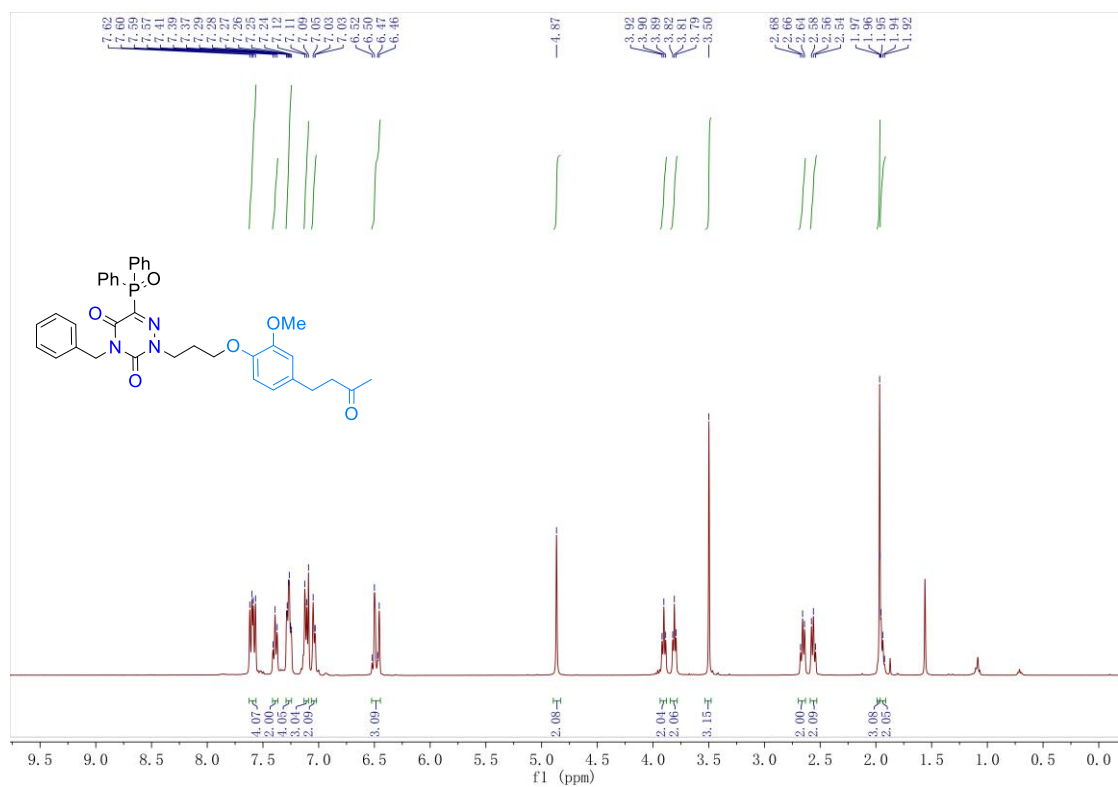

### 3ak-<sup>31</sup>P

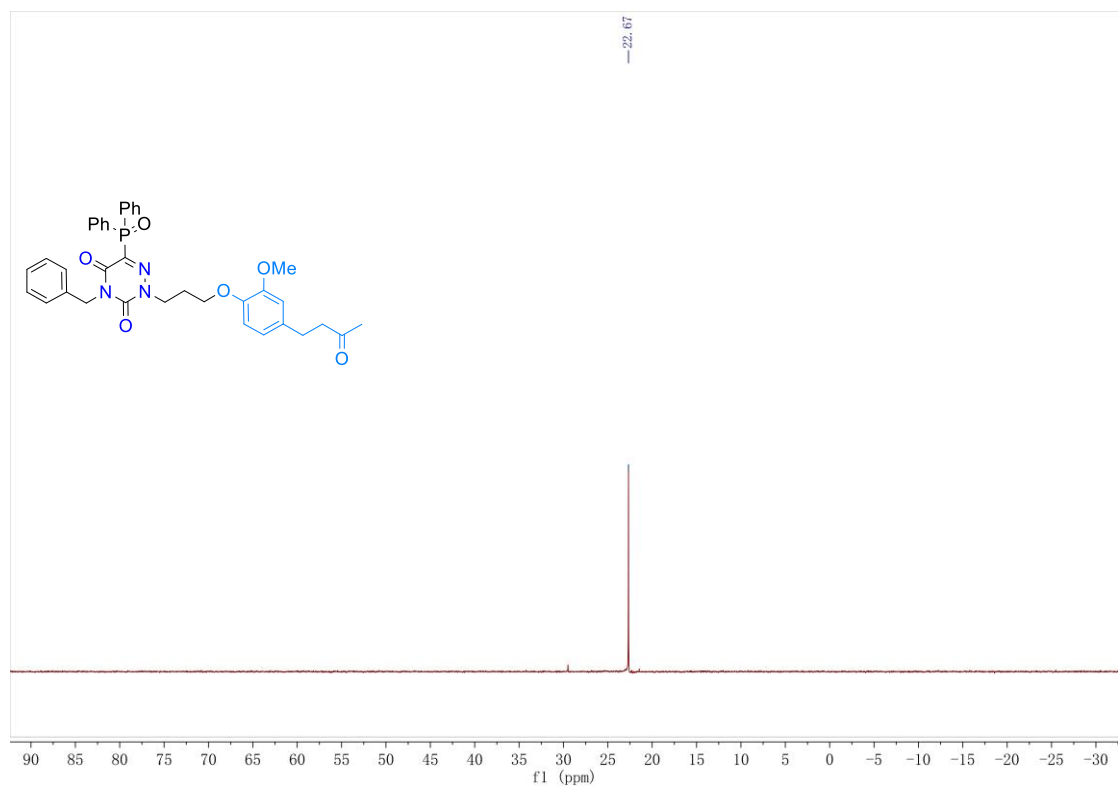

**3ak-<sup>13</sup>C**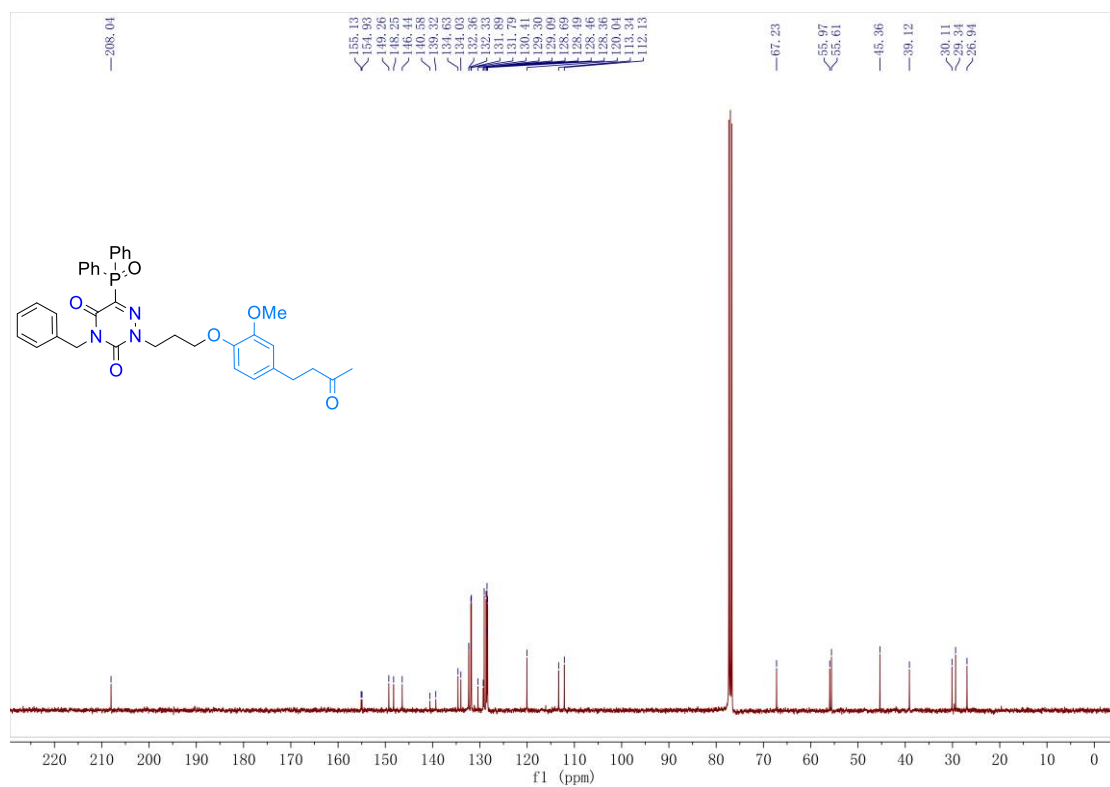**3al-<sup>1</sup>H**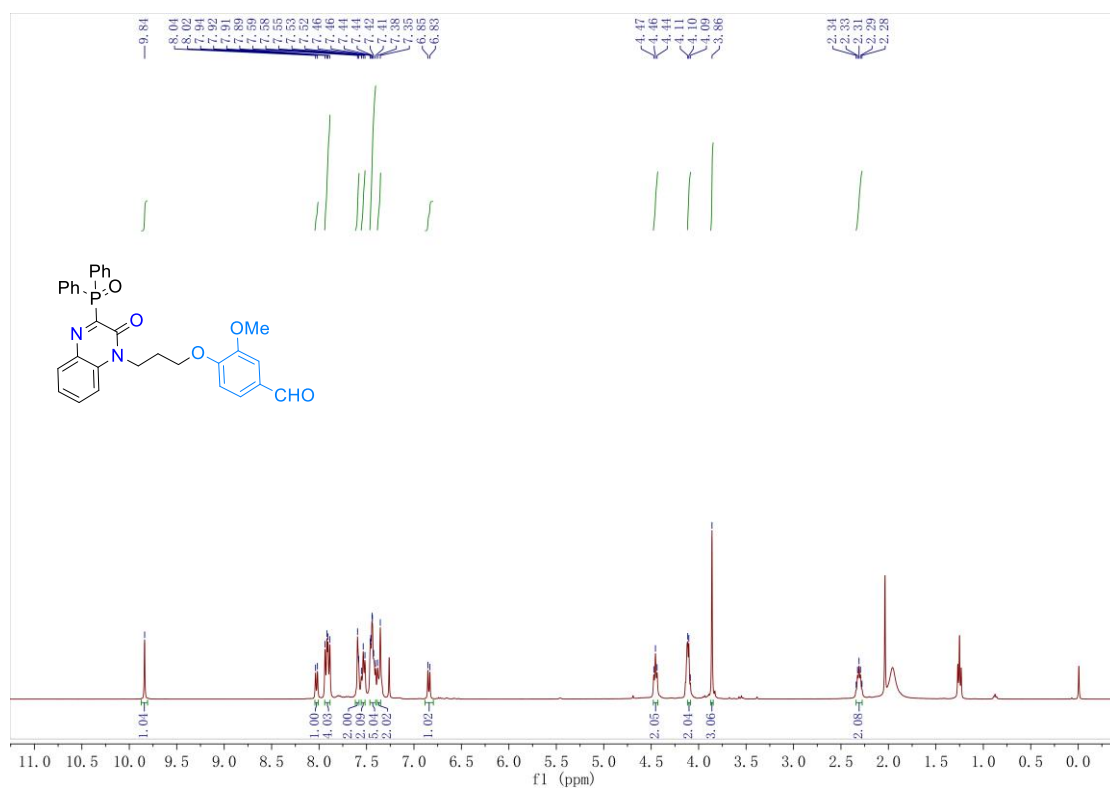

**3a1-<sup>31</sup>P**

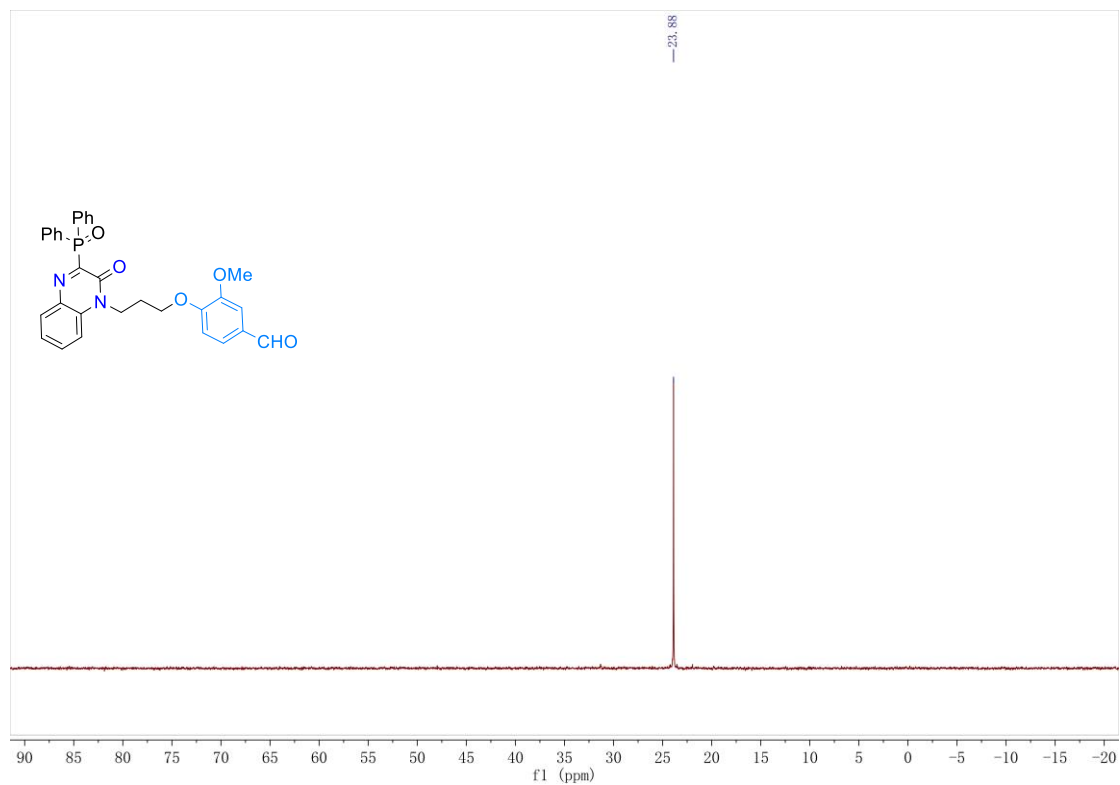

**3a1-<sup>13</sup>C**

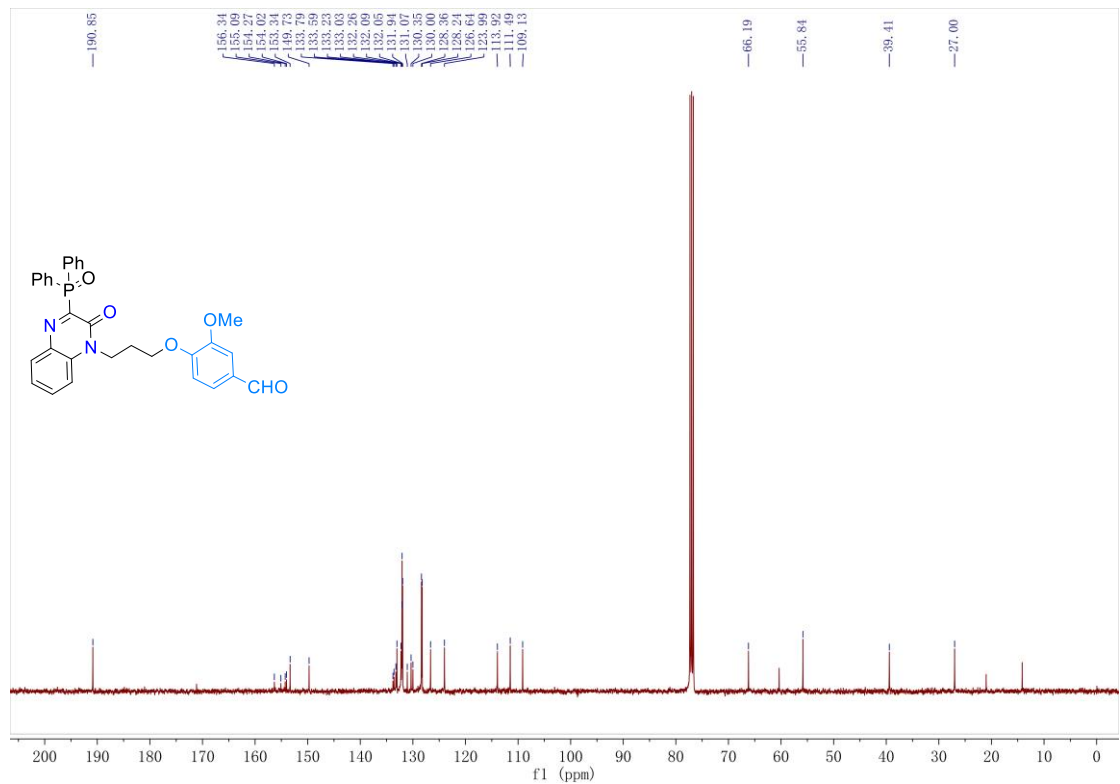

### 3am-<sup>1</sup>H

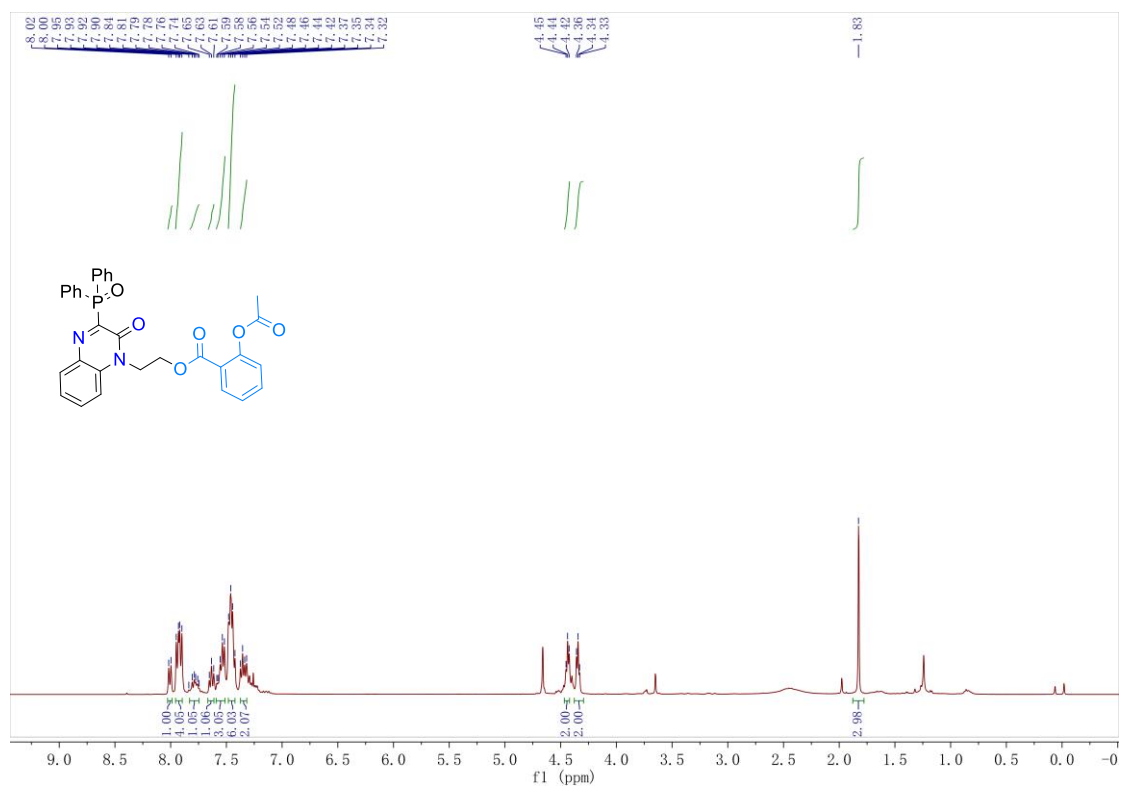

### 3am-<sup>31</sup>P

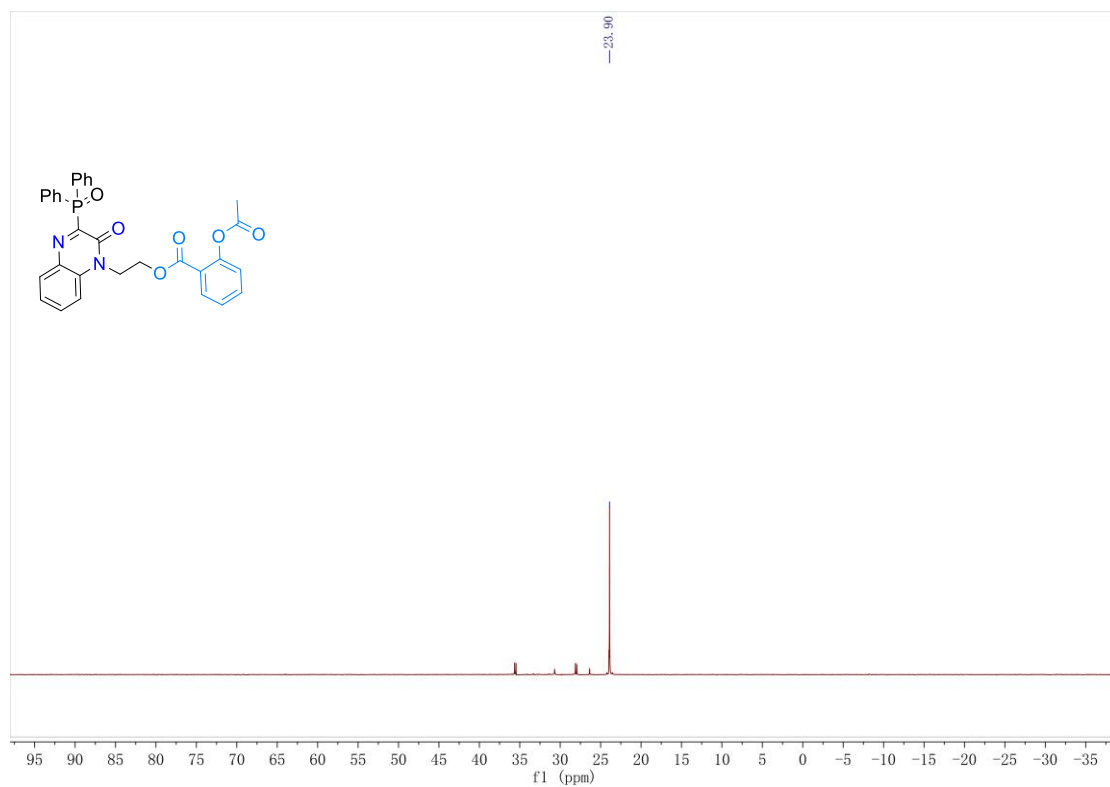

### 3am-<sup>13</sup>C

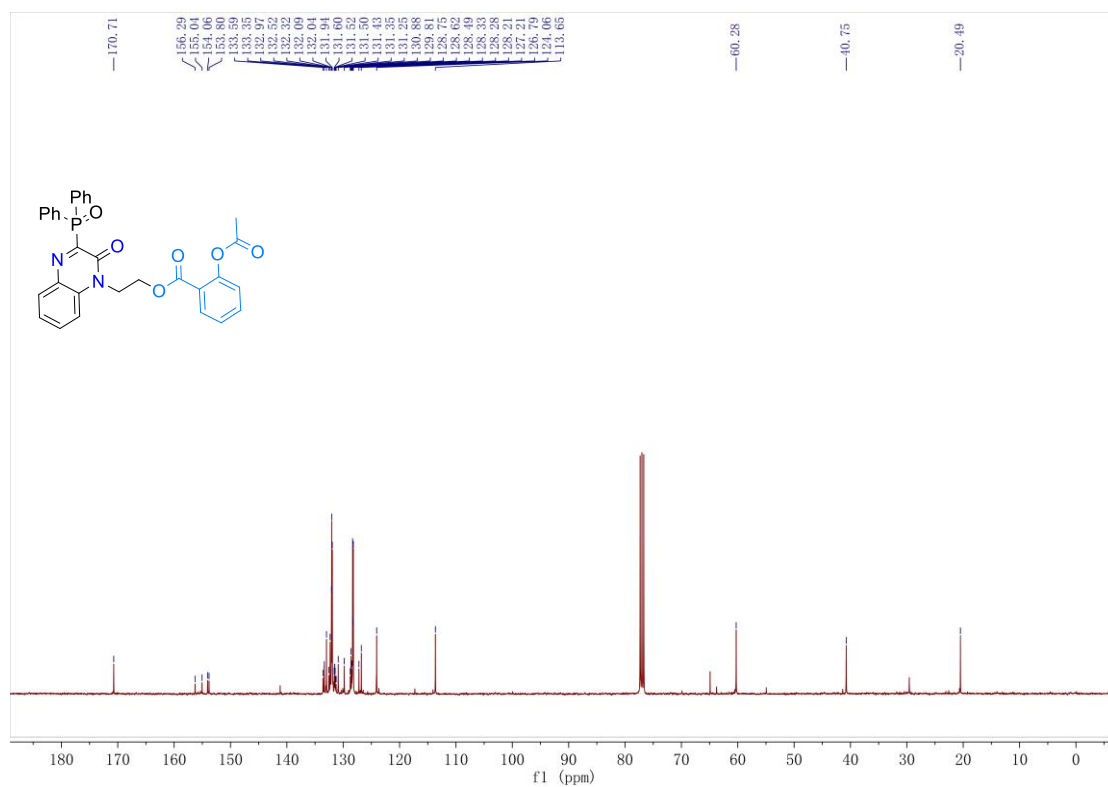

### 3an-<sup>1</sup>H

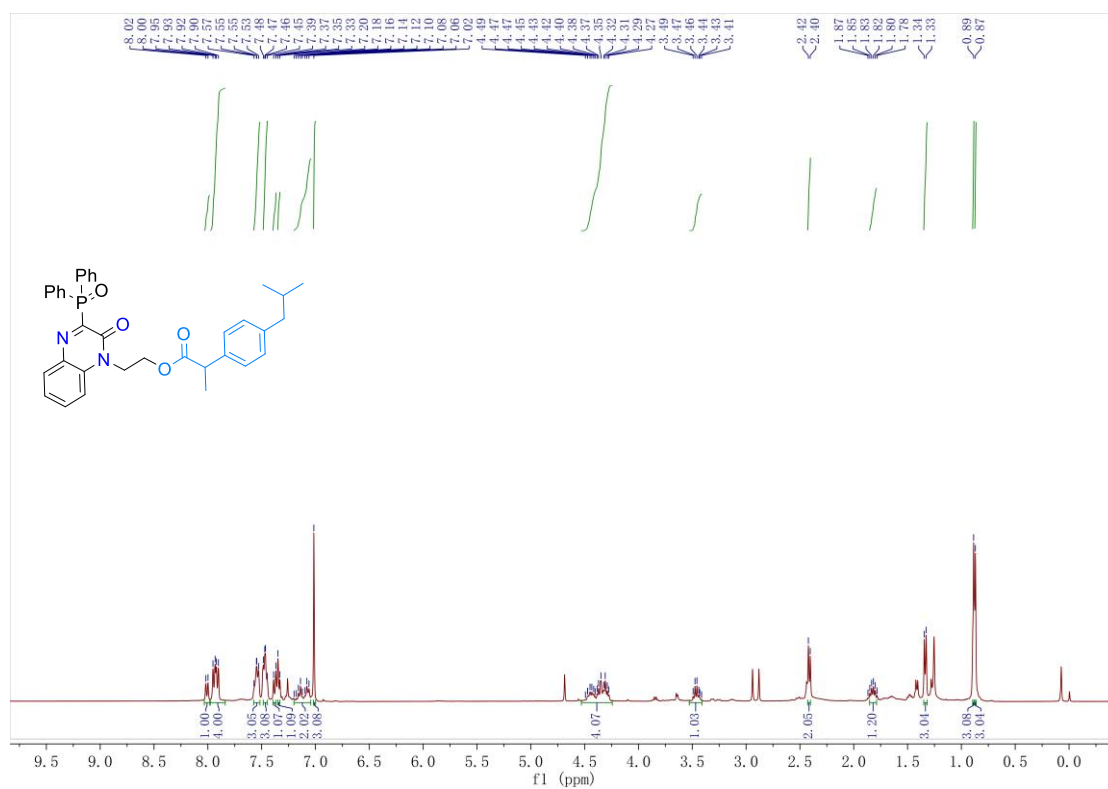

**3an-<sup>31</sup>P**

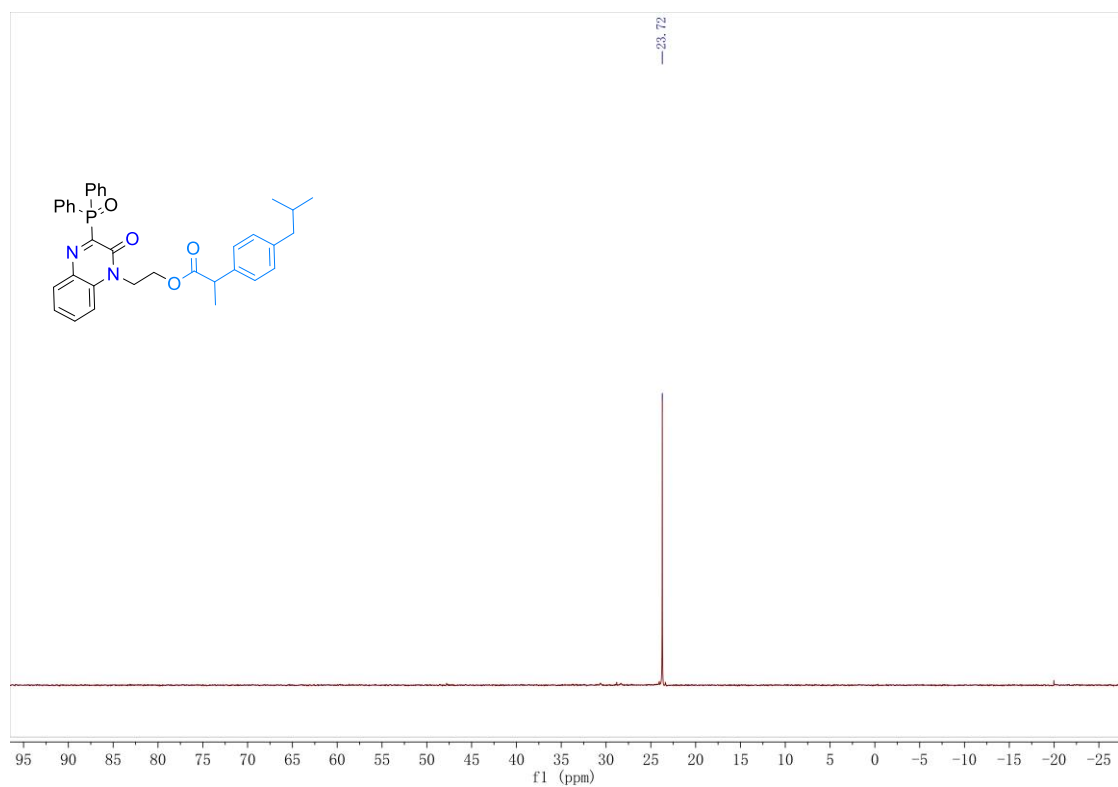

**3an-<sup>13</sup>C**

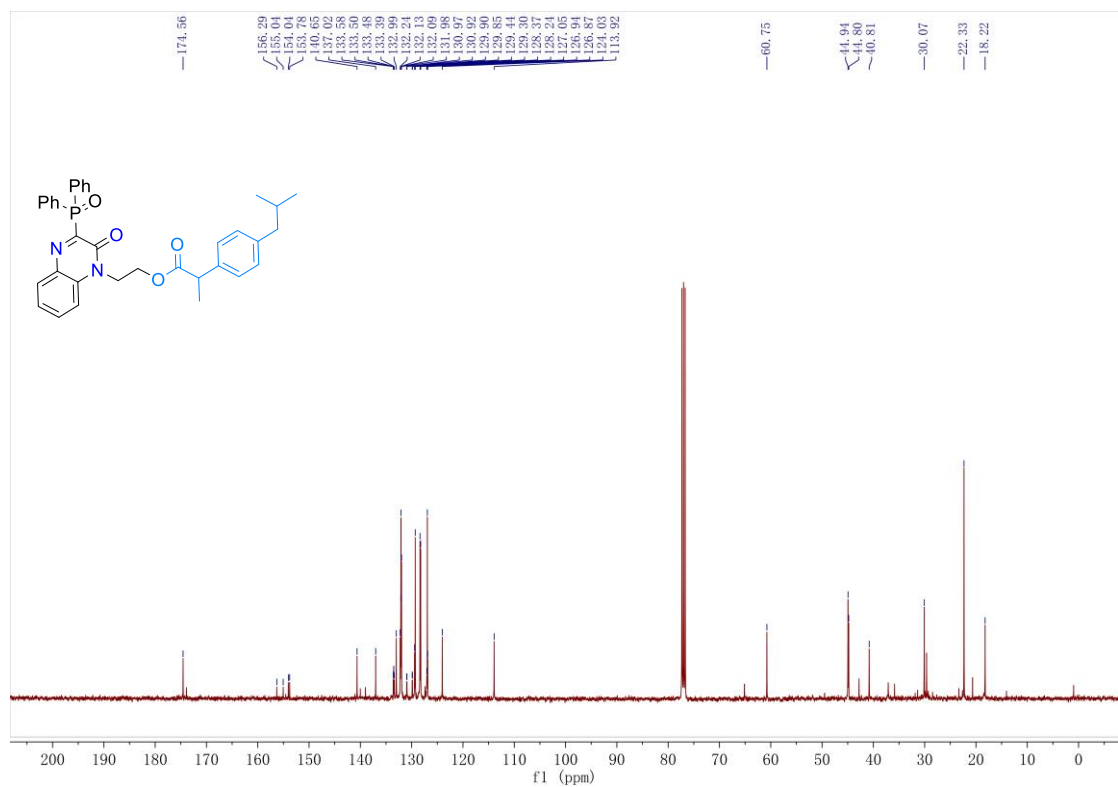

3ao-<sup>1</sup>H

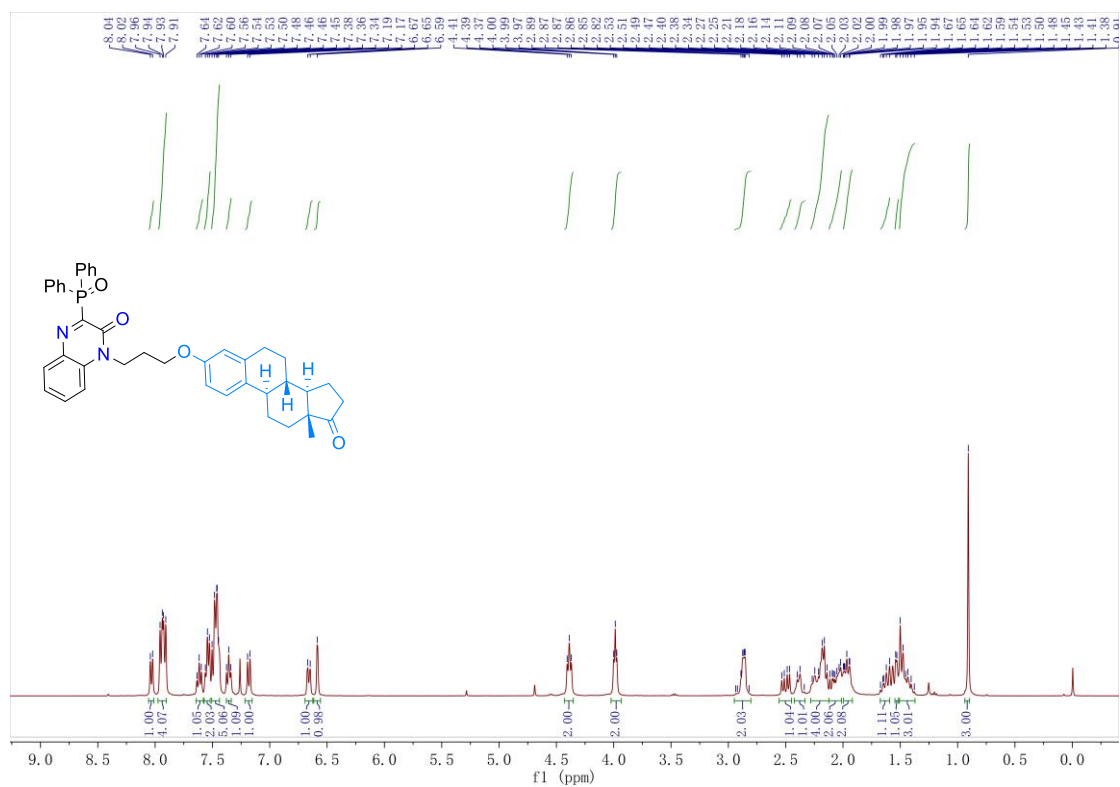

3ao-<sup>31</sup>P

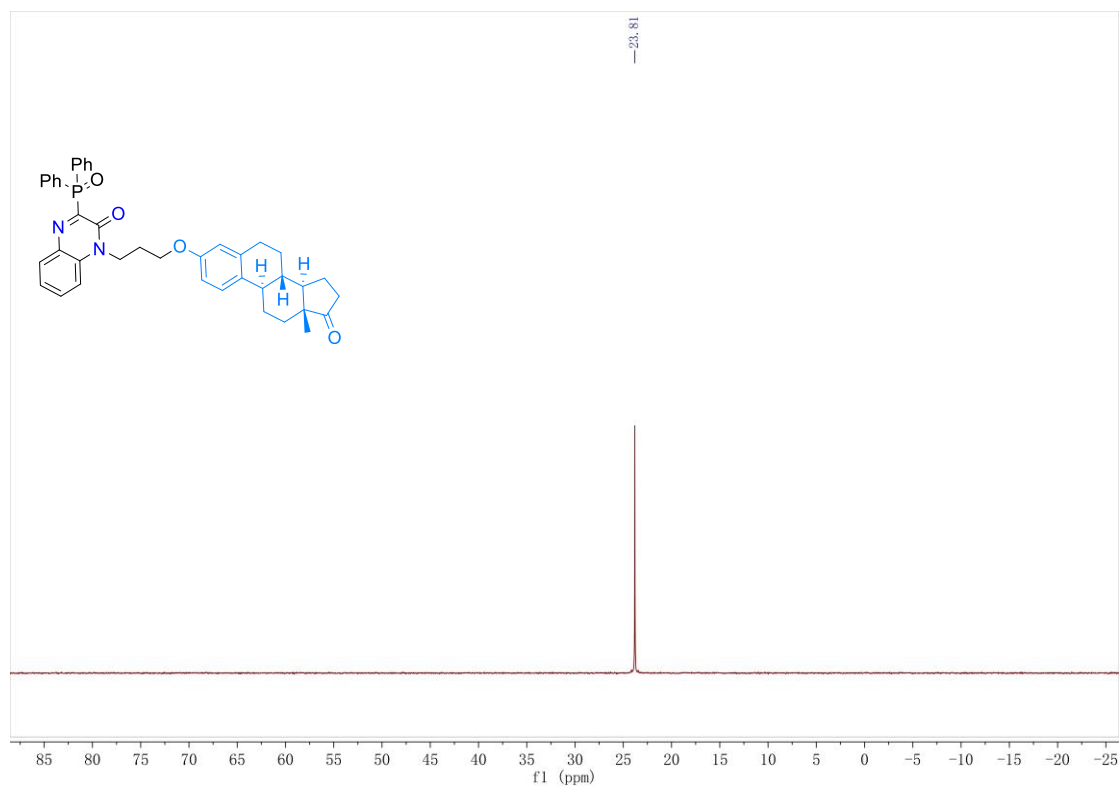

3a0-<sup>13</sup>C

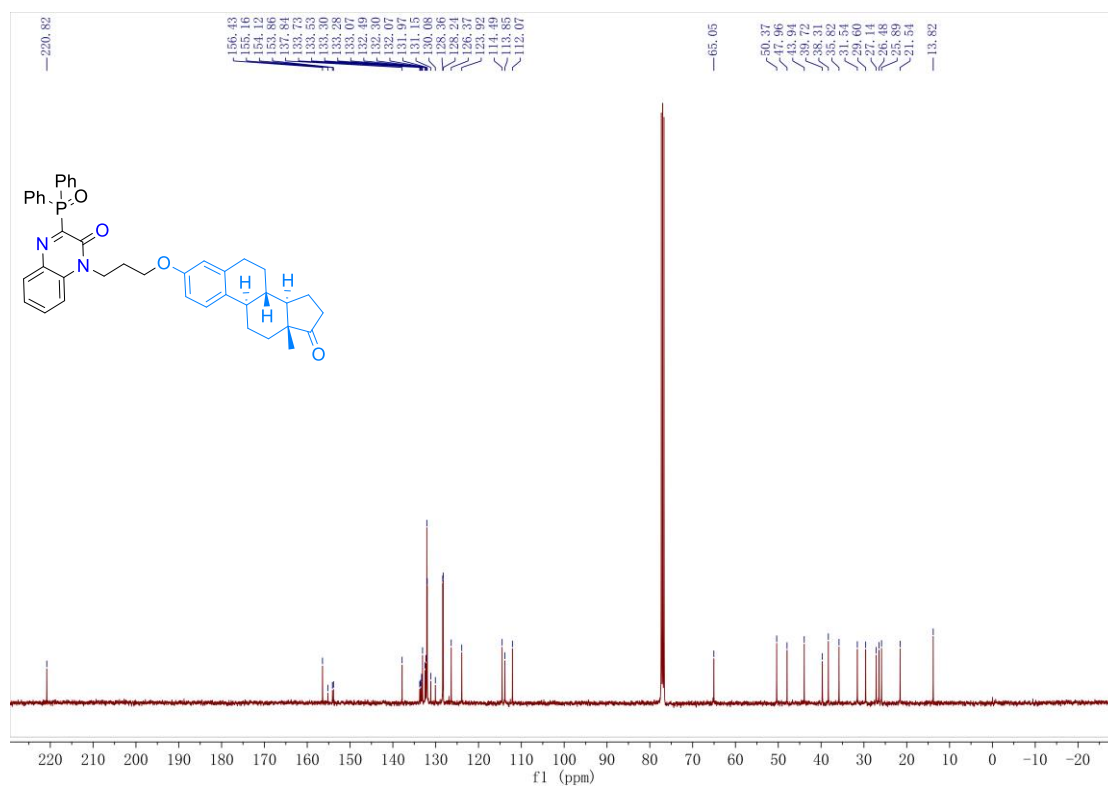

4-<sup>1</sup>H

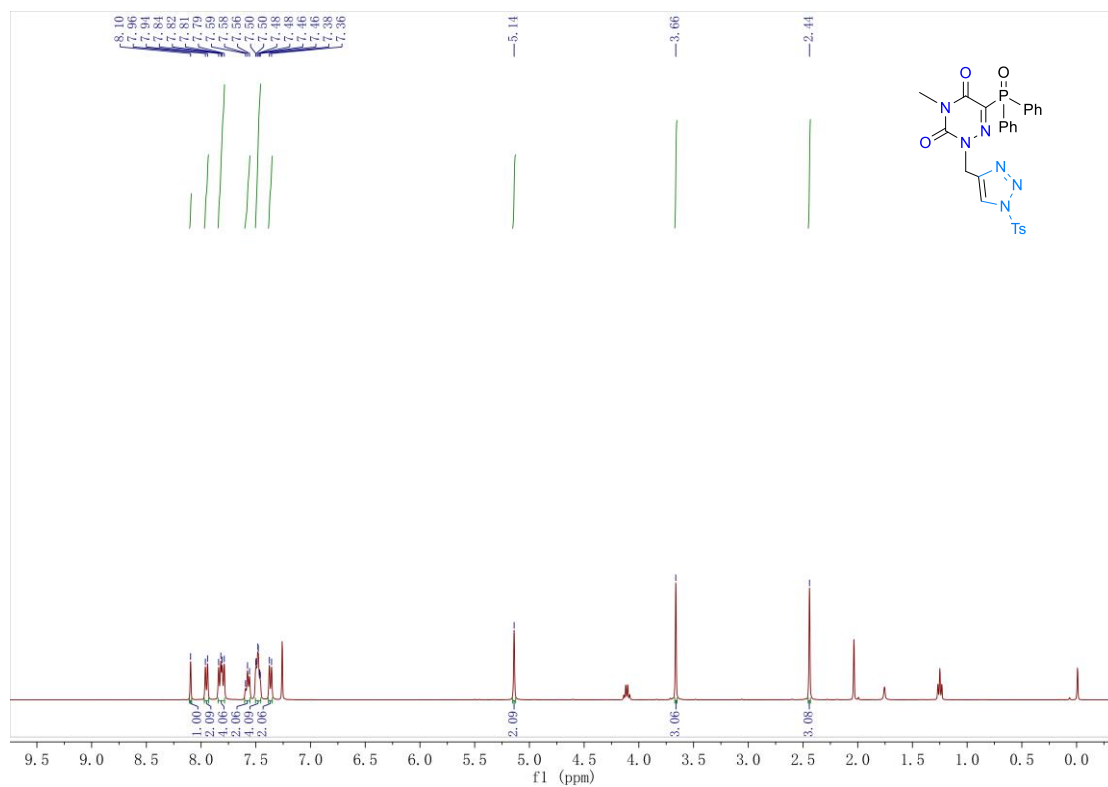



4.<sup>31</sup>P

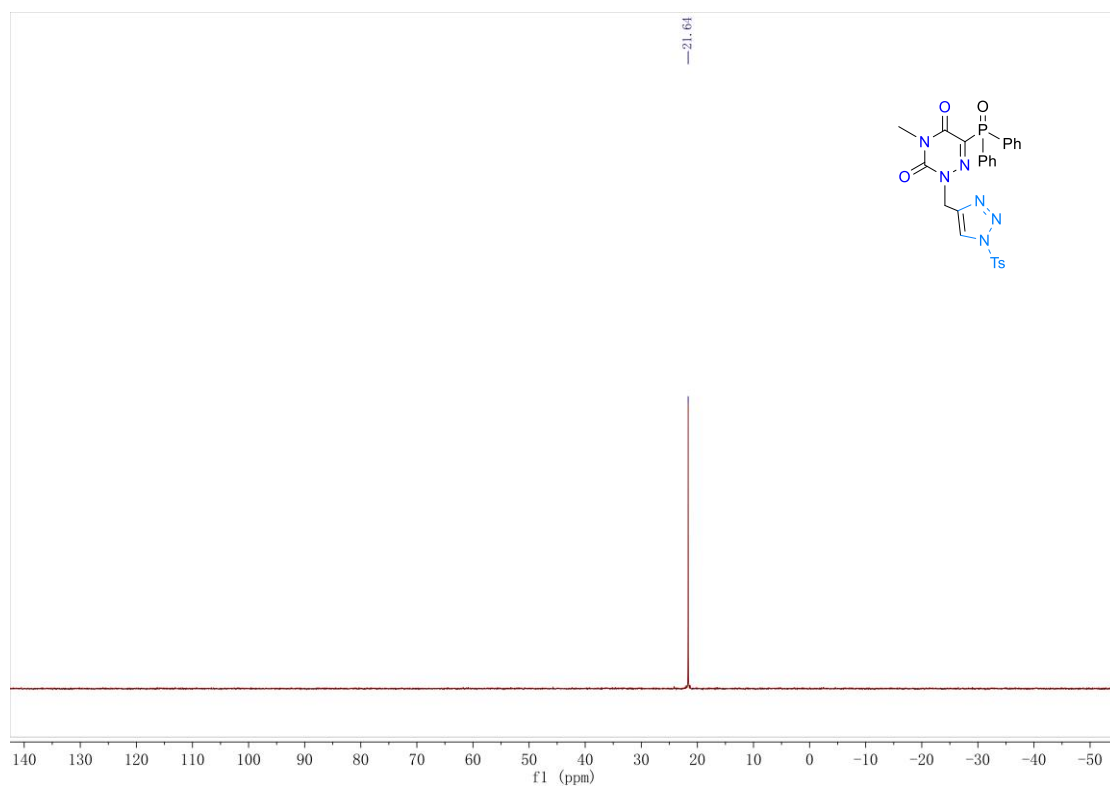

4.<sup>13</sup>C

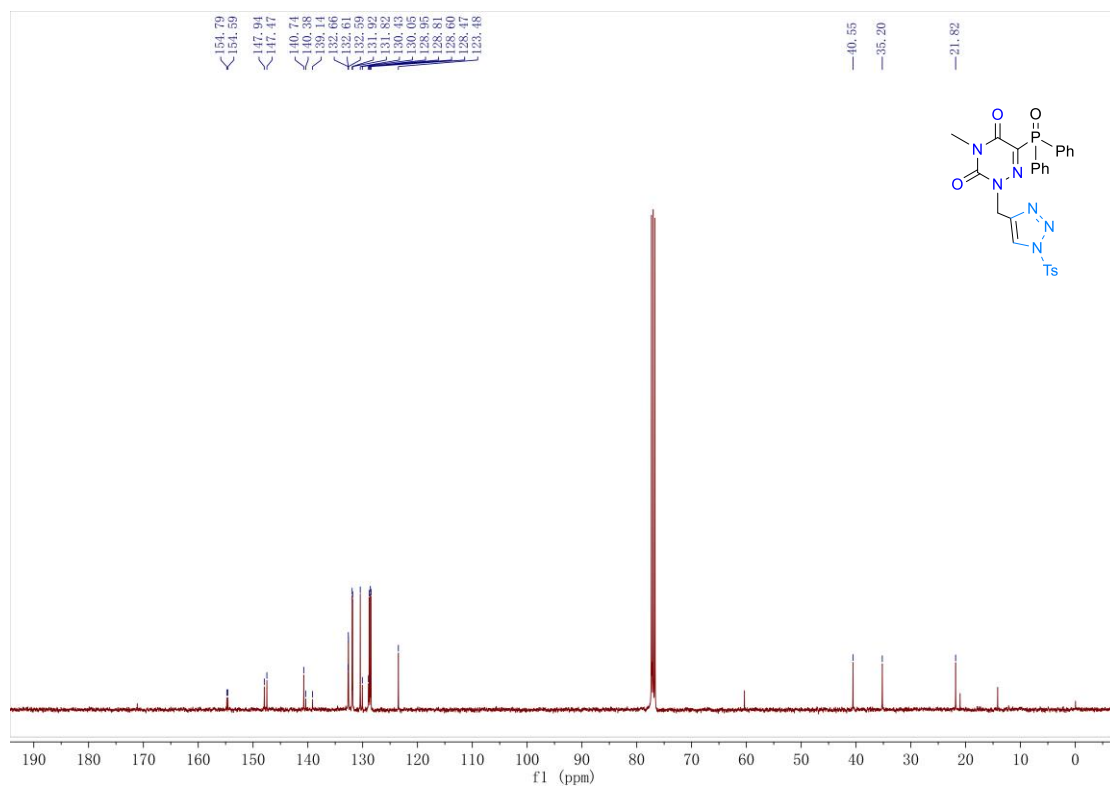

### $^1\text{H}$

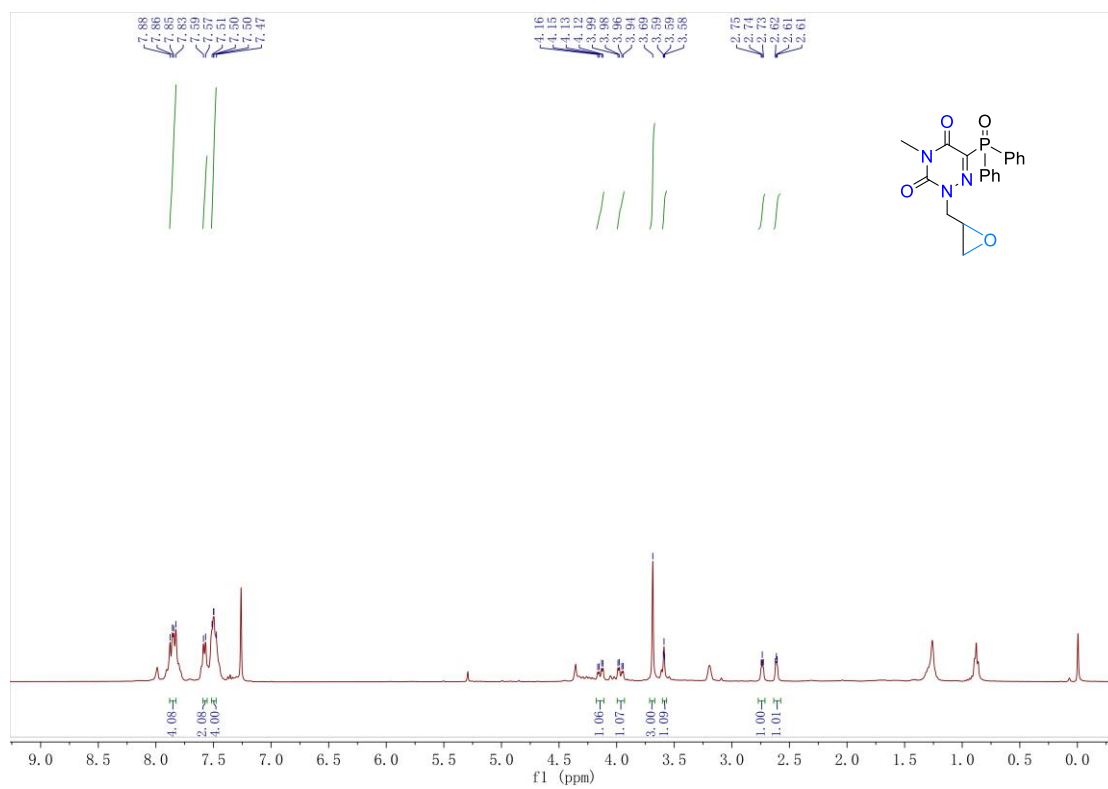

### $^{31}\text{P}$

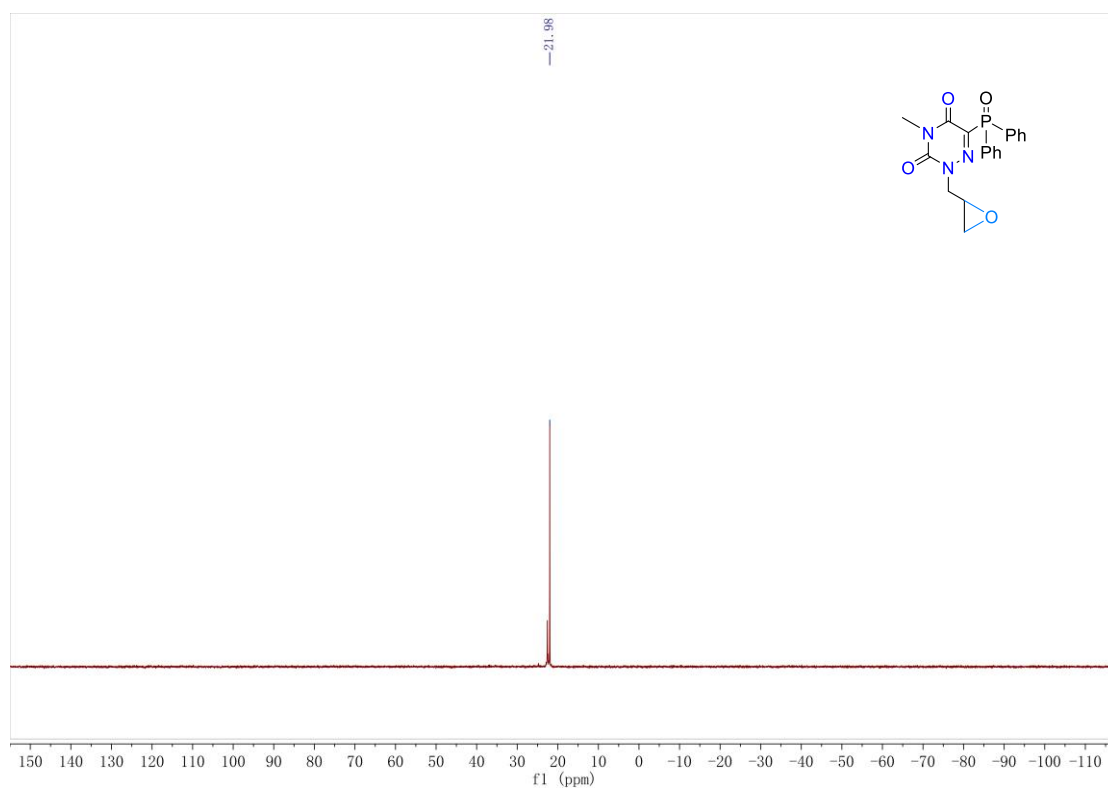

5-<sup>13</sup>C

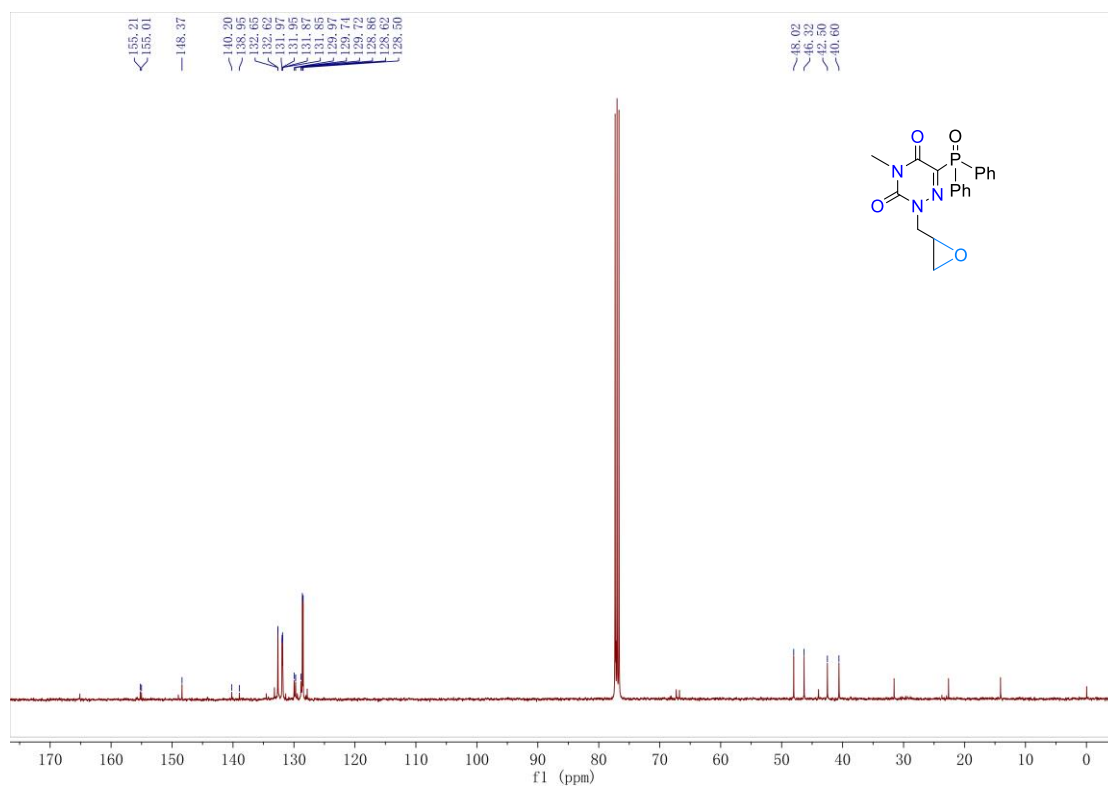

## VIII. References

- 1 P.-J. Huang and K.-H. Lee, *Med. Chem. Res.*, 2010, **20**, 1081-1090.
- 2 L. C. Hwang, S. Y. Yang, C. L. Chuang and G. H. Lee, *Molecules*, 2017, **22**, 1924.
- 3 X. K. He, J. Lu, A. J. Zhang, Q. Q. Zhang, G. Y. Xu and J. Xuan, *Org. Lett.*, 2020, **22**, 5984-5989.
- 4 K. Luo, Y. Z. Chen, L. X. Chen and L. Wu, *J. Org. Chem.*, 2016, **81**, 4682-4689.
- 5 D. Rawat, R. Kumar and A. Subbarayappa, *Green Chem.*, 2020, **22**, 6170-6175.
- 6 M. Gao, Y. Li, L. Xie, R. Chauvin and X. Cui, *Chem. Commun.*, 2016, **52**, 2846-2849.
- 7 Y. Kim and D. Y. Kim, *Tetrahedron Lett.*, 2018, **59**, 2443-2446.
